# Supplementary material
Source: PubMed Central journal article supplement (PMC9969403)

**Alkyne derivatives of SARS-CoV-2 main protease inhibitors including nirmatrelvir inhibit by reacting covalently with the nucleophilic cysteine**

Lennart Brewitz<sup>1,#,\*</sup>, Leo Dumjahn<sup>1,#</sup>, Yilin Zhao<sup>1,#</sup>, C. David Owen<sup>2,3</sup>, Stephen M. Laidlaw<sup>4</sup>, Tika R. Malla<sup>1</sup>, Dung Nguyen<sup>4</sup>, Petra Lukacik<sup>2,3</sup>, Eidarus Salah<sup>1</sup>, Adam D. Crawshaw<sup>2</sup>, Anna J. Warren<sup>2</sup>, Jose Trincao<sup>2</sup>, Claire Strain-Damerell<sup>2,3</sup>, Miles W. Carroll<sup>4</sup>, Martin A. Walsh<sup>2,3</sup>, and Christopher J. Schofield<sup>1,\*</sup>

<sup>1</sup>*Chemistry Research Laboratory, Department of Chemistry and the Ineos Oxford Institute for Antimicrobial Research, University of Oxford, 12 Mansfield Road, OX1 3TA, Oxford, United Kingdom.*

<sup>2</sup>*Diamond Light Source Ltd., Harwell Science and Innovation Campus, OX11 0DE, Didcot, United Kingdom.*

<sup>3</sup>*Research Complex at Harwell, Harwell Science and Innovation Campus, OX11 0FA, Didcot, United Kingdom.*

<sup>4</sup>*Wellcome Centre for Human Genetics, Nuffield Department of Medicine, University of Oxford, OX3 7BN, Oxford, United Kingdom.*

*#These authors contributed equally to this work.*

\*Email: christopher.schofield@chem.ox.ac.uk or lennart.brewitz@chem.ox.ac.uk

**Table of contents**

|                                                                                                                                             |         |
|---------------------------------------------------------------------------------------------------------------------------------------------|---------|
| 1. Supporting Figures                                                                                                                       | S2-S24  |
| 2. Supporting Tables                                                                                                                        | S25-S30 |
| 3. General synthesis information                                                                                                            | S31     |
| 4. General synthetic procedures                                                                                                             | S32-S33 |
| 5. Experimental procedures and compound characterizations                                                                                   | S34-S43 |
| 6. References                                                                                                                               | S44-S45 |
| 7. <sup>1</sup> H and <sup>13</sup> C NMR spectra of novel alkyne-containing SARS-CoV-2 M <sup>pro</sup> inhibitors prepared for this study | S46-S53 |
| 8. HPLC traces of selected SARS-CoV-2 M <sup>pro</sup> inhibitors prepared for this study                                                   | S54-S58 |

## 1. Supporting Figures

**Supporting Figure S1. Synthesis and purification of the N-terminally acetylated 37mer substrate-derived C-terminal product peptide.** (a) Sequence and purification characteristics of the N-terminally acetylated C-terminal product peptide derived from the 37mer M<sup>pro</sup> substrate (ALNDFSNSGSDVLYQPPQTSITSAVLQ/SGFRKMAFPS-NH<sub>2</sub>; '/' indicates the cleavage site)<sup>1,2</sup>, that is: Ac-SGFRKMAFPS-NH<sub>2</sub>. The Ac-SGFRKMAFPS-NH<sub>2</sub> peptide was synthesized as a C-terminal amide using microwave-assisted solid phase peptide synthesis (SPPS) (from the C- to N-terminus). After complete assembly of the protected peptide sequence, the Fmoc group of the N-terminal amino acid residue was cleaved using 20%<sub>v/v</sub> piperidine in DMF. The resultant free N-terminal amine was capped with an acetyl group using commercially-sourced *N*-acetyloxysuccinimide (Tokyo Chemical Industry UK Ltd.) in DMF according to a reported procedure.<sup>3</sup> The N-terminally acetylated peptide was cleaved from the resin and simultaneously deprotected, then purified using a semi-preparative HPLC machine (Shimadzu UK Ltd.) equipped with a reverse phase column (Gemini 00G-4454-U0-AX; phase: NX-C18). The purity (>90%) and mass of the Ac-SGFRKMAFPS-NH<sub>2</sub> peptide was determined using HPLC and solid phase extraction coupled to mass spectrometry (SPE-MS), respectively; (b) mass spectrum (SPE-MS) of the Ac-SGFRKMAFPS-NH<sub>2</sub> peptide.  $m/z = 1068.55$  and  $1190.53$  correspond to the +1 charge state of the Ac-SGFRKMAFPS-NH<sub>2</sub> peptide, the latter observed as the Na<sup>+</sup> ion; the enlarged region shows the  $m/z + 1$  peaks.  $m/z = 584.78$  corresponds to the +2 charge state of the Ac-SGFRKMAFPS-NH<sub>2</sub> peptide. Note,  $m/z$  values refer to the most abundant isotope.

(a) N-Acetylated C-terminal hydrolysis product of the 37mer SARS-CoV-2 M<sup>pro</sup> substrate peptide

Ac-S-G-F-R-K-M-A-F-P-S-NH<sub>2</sub>

HPLC gradient: 2%<sub>v/v</sub> to 45%<sub>v/v</sub> MeCN/H<sub>2</sub>O  
(+0.1%<sub>v/v</sub> TFA) over 37 min

t<sub>R</sub>: 20.4 min

SPE-MS:  $m/z$  calculated for C<sub>53</sub>H<sub>82</sub>N<sub>15</sub>O<sub>13</sub>S [M+H]<sup>+</sup>:  
1168.5932, found: 1168.5492

(b)

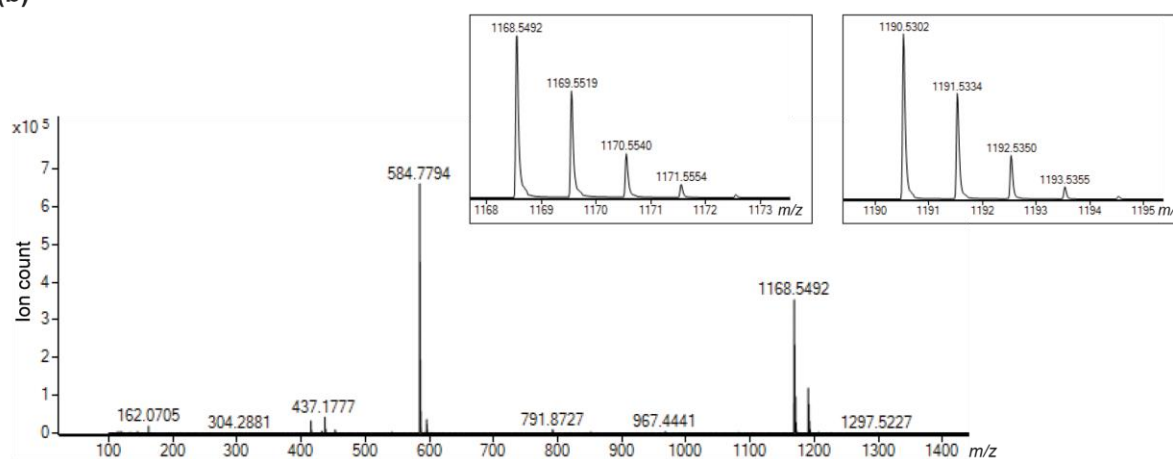

**Supporting Figure S2. The use of the N-terminally acetylated 37mer substrate-derived C-terminal product peptide as an internal standard does not affect SARS-CoV-2 M<sup>pro</sup> catalysis.** (a) The N-terminally acetylated C-terminal product peptide (*i.e.* Ac-SGFRKMAFPS-NH<sub>2</sub>; black circles) derived from the used 37mer SARS-CoV-2 M<sup>pro</sup> substrate ALNDFSNSGSDVLYQPPQTSITSAVLQSGFRKMAFPS-NH<sub>2</sub><sup>1-2</sup> is not a substrate for isolated recombinant SARS-CoV-2 M<sup>pro</sup>, as the corresponding deacylation product (orange diamonds) was not observed by SPE-MS under the assay conditions (conditions: 0.1 μM M<sup>pro</sup> and 2.0 μM Ac-SGFRKMAFPS-NH<sub>2</sub> in 20 mM HEPES, pH 7.5, 50 mM NaCl at ambient temperature). Results are a mean of independent triplicates (n = 3; mean ± standard deviation, SD). Note that the corresponding 37mer-derived N-terminally acetylated N-terminal product peptide is not suitable as an internal standard due to its comparatively poor ionization under the assay conditions; (b) The presence of the N-terminally acetylated C-terminal product peptide Ac-SGFRKMAFPS-NH<sub>2</sub> from the used 37mer SARS-CoV-2 M<sup>pro</sup> substrate (ALNDFSNSGSDVLYQPPQTSITSAVLQSGFRKMAFPS-NH<sub>2</sub><sup>1-2</sup>) in the assay mixture does not affect M<sup>pro</sup> catalysis. SPE-MS analysis reveals that M<sup>pro</sup> catalyzes substrate depletion with similar rates in the absence (blue circles) and presence (pink diamonds) of the Ac-SGFRKMAFPS-NH<sub>2</sub> peptide (conditions: 0.05 μM M<sup>pro</sup>, 2.0 μM ALNDFSNSGSDVLYQPPQTSITSAVLQSGFRKMAFPS-NH<sub>2</sub><sup>1-2</sup>, with or without 0.2 μM Ac-SGFRKMAFPS-NH<sub>2</sub> in 20 mM HEPES, pH 7.5, 50 mM NaCl at ambient temperature). Results are a mean of independent triplicates (n = 3; mean ± SD).

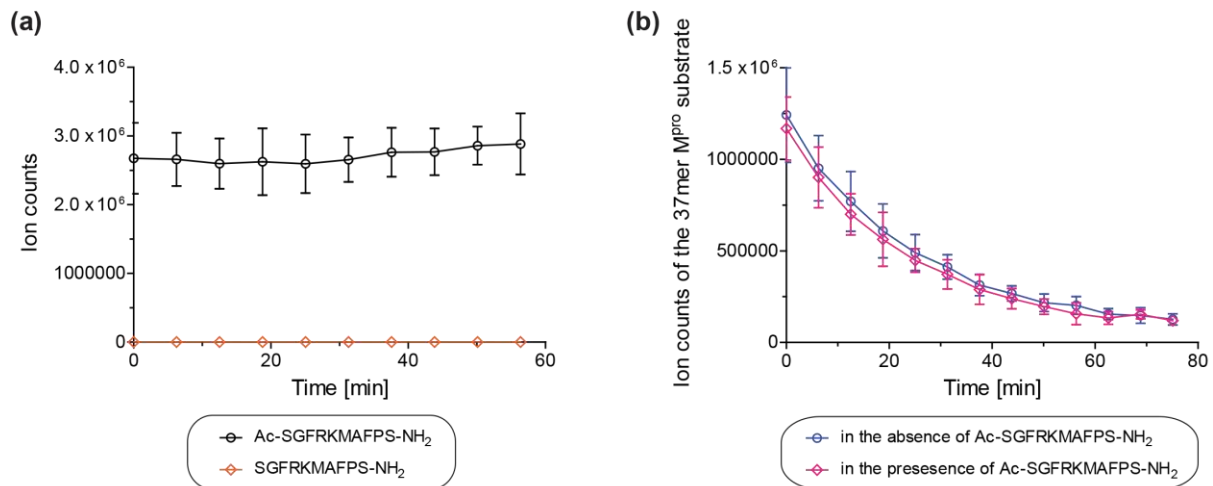

**Supporting Figure S3. Dose-responses observed for nitrile- and alkyne-bearing SARS-CoV-2 M<sup>pro</sup> inhibitors from cell-based experiments used to determine EC<sub>50</sub> values.** Cell-based antiviral assays were performed as described in the Experimental Section. Results are a mean of independent triplicates (n = 3; mean ± SD). Note that dose-response curves are only shown for those inhibitors which were active over the tested concentration range (100 μM top concentration). Dose-response curves of M<sup>pro</sup> inhibitors shown in (a) Table 1, (b) Table 2, and (c) Table 3.

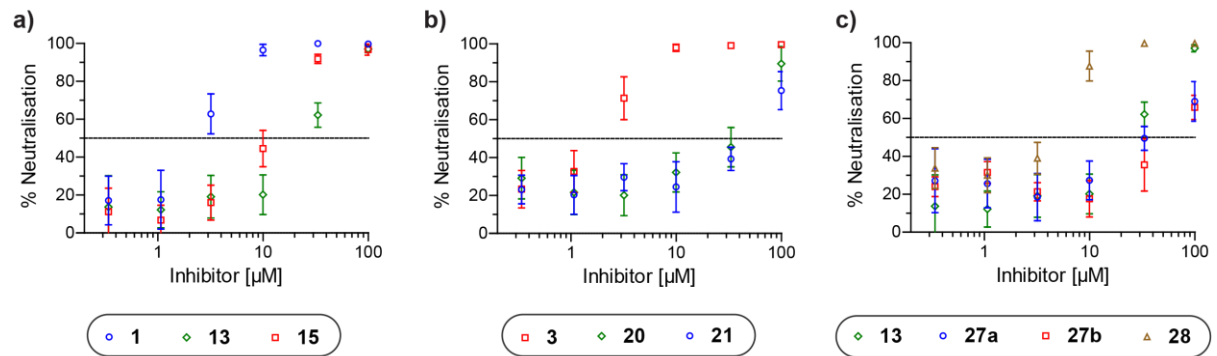

**Supporting Figure S4. Synthesis of alkyne and nitrile derivatives of nirmatrelvir with a methionine at the P1 equivalent position.** Alkyne **14** was synthesized from commercially-sourced Boc-*L*-methionine (**38**) in five steps using the reported methionine alkyne **40**<sup>4</sup> as an intermediate. Thus, Boc-*L*-methionine (**38**) was converted to the corresponding Weinreb amide<sup>5</sup>, which was reduced to aldehyde **39** using LiAlH<sub>4</sub>. Aldehyde **39** was converted to the corresponding alkyne using the Ohira-Bestmann reagent **10**;<sup>6-7</sup> the product was deprotected with HCl, and coupled to the reported acid **12**<sup>8</sup> using COMU<sup>9</sup> to afford **14** in 17% yield, following HPLC purification. Nirmatrelvir methionine nitrile **15** was obtained in two steps from commercially-sourced *L*-methionine amide (**41**), by adapting Pfizer's synthesis of nirmatrelvir (**1**).<sup>8</sup> The commercially-sourced *L*-methionine amide was coupled with the reported acid **12**<sup>8</sup> using COMU,<sup>9</sup> and the intermediate amide was dehydrated using the Burgess reagent (**42**)<sup>10-11</sup> to afford nitrile **15** in 13% yield, following HPLC purification.

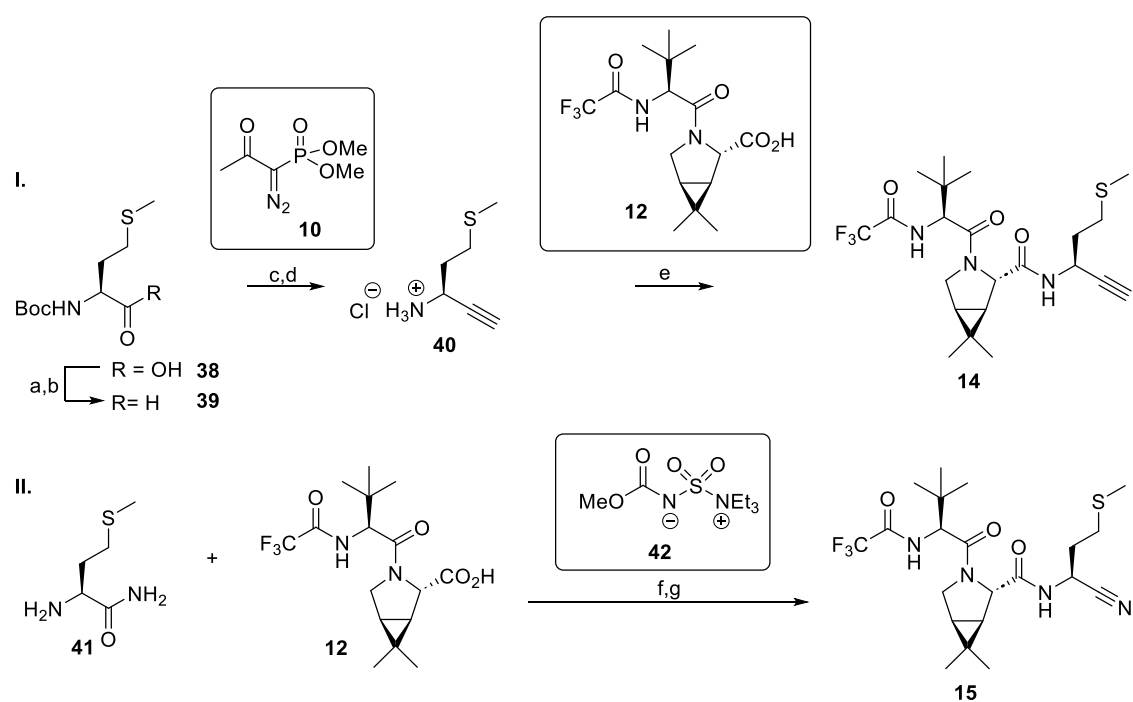

**Reagents and conditions:** a) Me(OMe)NH·HCl, 1,1'-carbonyldiimidazole (CDI), <sup>t</sup>PrNEt<sub>2</sub>, CH<sub>2</sub>Cl<sub>2</sub>, rt, 99%; b) LiAlH<sub>4</sub>, THF/Et<sub>2</sub>O, 0 °C, 94%; c) **10**<sup>6-7</sup>, K<sub>2</sub>CO<sub>3</sub>, MeOH, rt, 47%; d) HCl (4 M in dioxane), CH<sub>2</sub>Cl<sub>2</sub>, rt, app. quant.; e) **12**<sup>8</sup>, COMU<sup>9</sup>, *N*-methylmorpholine (NMM), DMF/CH<sub>2</sub>Cl<sub>2</sub>, 0 °C to rt, 17%; f) **12**<sup>8</sup>, COMU<sup>9</sup>, NMM, DMF/CH<sub>2</sub>Cl<sub>2</sub>, 0 °C to rt, 36%; g) **42**<sup>10-11</sup>, CH<sub>2</sub>Cl<sub>2</sub>, rt, 13%.

**Supporting Figure S5. Robustness of the SARS-CoV-2 M<sup>pro</sup> SPE-MS inhibition assays.** (a) Z'-factors<sup>12</sup> (circles) and (b) signal-to-noise ratios (S/N, boxes) for all SARS-CoV-2 M<sup>pro</sup> inhibition assay plates analyzed to determine IC<sub>50</sub>-values. The Z'-factors >0.5 (grey line) indicate a stable and robust assay of high quality.<sup>12</sup> Z'-factors and S/N-ratios were determined according to the literature using Microsoft Excel.<sup>12</sup>

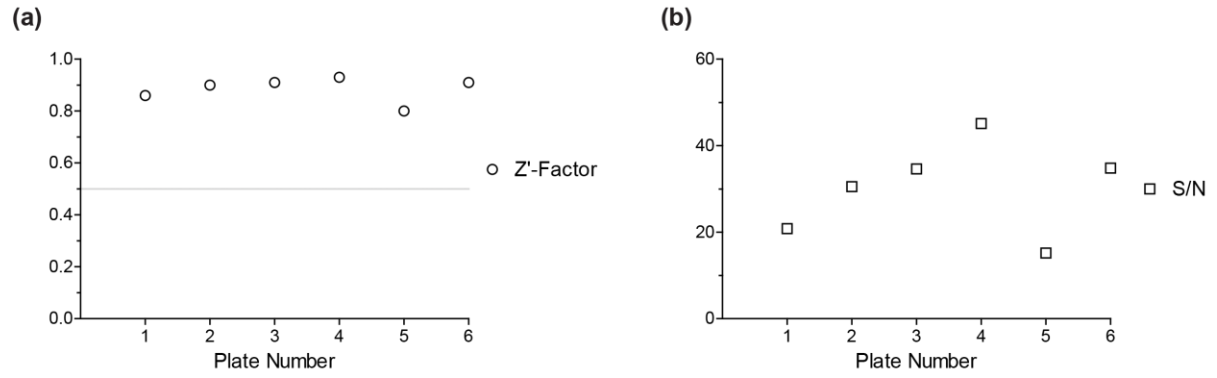

**Supporting Figure S6. Synthesis of the MI-09 derived nitriles 20 and 21.** The nitrile-bearing MI-09 (**4**)<sup>13</sup> derivatives **20** and **21** were synthesized according to procedures for the synthesis of nirmatrelvir (**1**).<sup>8</sup> The reported acids **16**<sup>13</sup> or **17** were coupled with the reported amide **43**<sup>8</sup> using COMU.<sup>9</sup> The intermediate amides were dehydrated using the Burgess reagent (**42**)<sup>10-11</sup> to afford nitriles **20** and **21** in 53% and 58% yield, respectively, following HPLC purification.

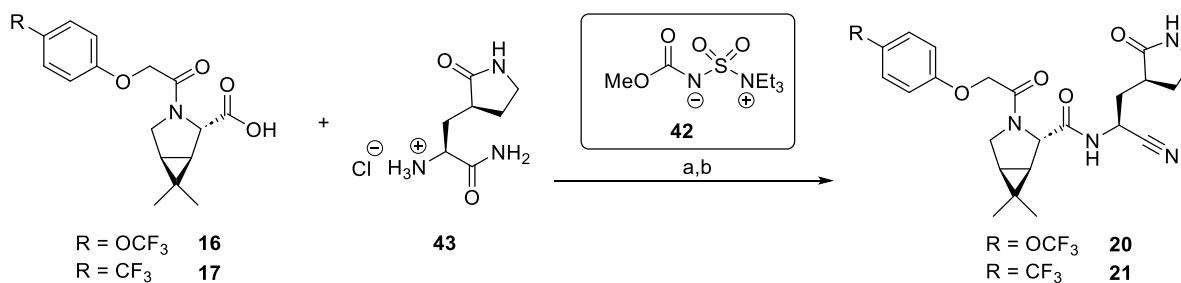

**Reagents and conditions:** a) **16**<sup>13</sup> or **17**, COMU<sup>9</sup>, *N*-methylmorpholine (NMM), DMF/CH<sub>2</sub>Cl<sub>2</sub>, 0 °C to rt, 17% and 41%, respectively; b) **42**<sup>10-11</sup>, CH<sub>2</sub>Cl<sub>2</sub>, rt, 53% and 58%, respectively.

**Supporting Figure S7. Crystallographic analysis of the M<sup>pro</sup>:13 complex.** Color code: SARS-CoV-2 M<sup>pro</sup>: grey; carbon-backbone of **13** in complex with M<sup>pro</sup> is in orange; oxygen: red; nitrogen: blue; sulfur: yellow; fluorine: light blue. (a) Overview of the SARS-CoV-2 M<sup>pro</sup>:**13** complex structure; (b) superimposition of a view from the M<sup>pro</sup>:**13** complex structure with one from the reported M<sup>pro</sup>:**1** complex structure (pale yellow: M<sup>pro</sup>; green: carbon-backbone of nirmatrelvir (**1**) in complex with M<sup>pro</sup>; PDB ID: 7TE0<sup>14</sup>) reveals similar M<sup>pro</sup> conformations (RMSD = 0.313 Å).

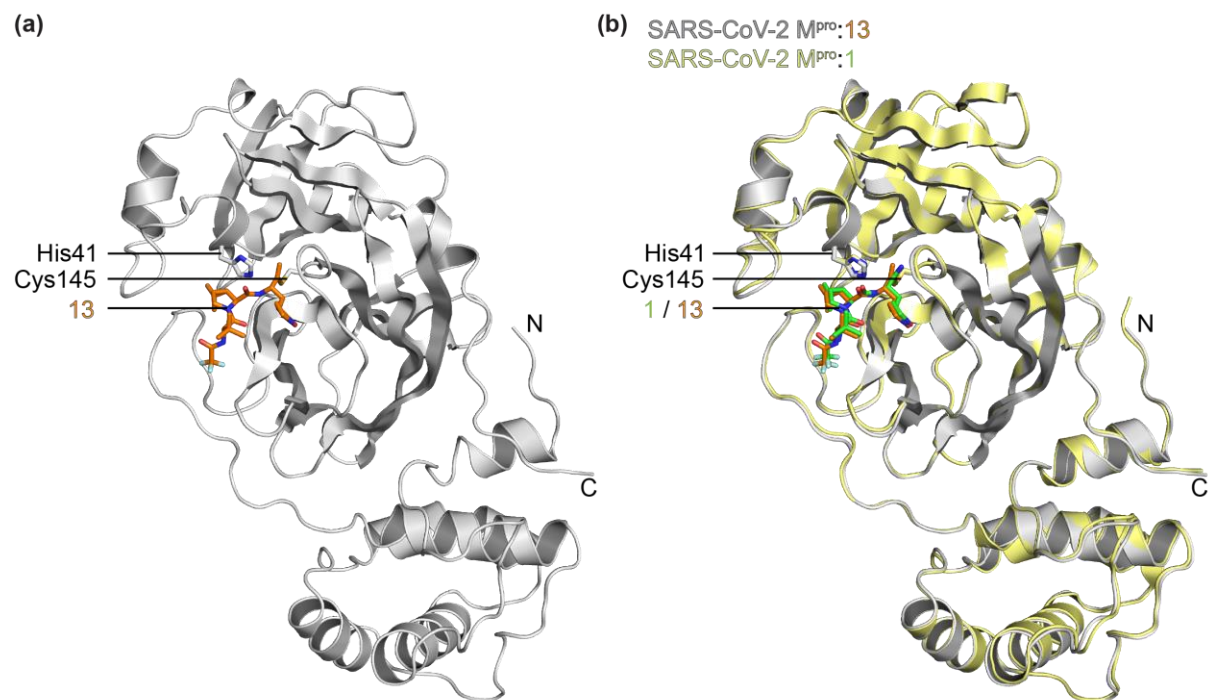



**Supporting Figure S8. Nirmatrelvir (1) and nirmatrelvir-derived alkyne 13 bind with SARS-CoV-2 M<sup>Pro</sup> in a similar overall manner (continues on the following page).** Color code: SARS-CoV-2 M<sup>Pro</sup>: grey; carbon-backbone of **13** in complex with M<sup>Pro</sup> is in orange; oxygen: red; nitrogen: blue; sulfur: yellow; fluorine: light blue. (a and b) View of the surface from the M<sup>Pro</sup>:**13** complex structure active site (a) revealing that the groups at the P1-4 substrate-equivalent positions of **13** occupy the same M<sup>Pro</sup> substrate binding pockets as reported for an M<sup>Pro</sup>:**1** complex structure (b, pale yellow: M<sup>Pro</sup>; green: carbon-backbone of nirmatrelvir (**1**) in complex with M<sup>Pro</sup>; PDB ID: 7TE0<sup>14</sup>), *i.e.* the cycloglutamine groups occupy the S1 pocket, the bicyclic leucine isosteres occupy the hydrophobic S2 pocket, the *tert*-butyl groups are solvent exposed, and the trifluoroacetamide groups occupy the S4 pocket. (c) Alkyne **13** in complex with M<sup>Pro</sup> is covalently bound to Cys145 as a thioether (distance of the Cys145 S-atom to the internal C-atom of the vinyl group: 1.8 Å). The trifluoroacetamide NH of **13** is positioned to interact with the main chain carbonyl O-atom of Glu166 (2.8 Å), the carbonyl O-atom of the *tert*-butylglycine unit of **13** is positioned to interact with the main chain amide NH of Glu166 (2.9 Å), the amide NH linking the bicyclic leucine isostere and the cycloglutamine unit of **13** is positioned to interact with the main chain amide carbonyl O-atom of His164 (3.0 Å), and the carbonyl O-atom of the cycloglutamine side chain of **13** is positioned to interact with an imidazole NH of the His163 side chain (2.7 Å). (d) Nirmatrelvir (**1**) in complex with M<sup>Pro</sup> (pale yellow: M<sup>Pro</sup>; green: carbon-backbone of **1** in complex with M<sup>Pro</sup>; PDB ID: 7TE0<sup>14</sup>) is covalently bound to Cys145 via a thioimide (distance of the Cys145 S-atom to the thioimide C-atom: 1.8 Å). The trifluoroacetamide NH of **1** is positioned to interact with the main chain carbonyl O-atom of Glu166 (2.8 Å), the carbonyl O-atom of the *tert*-butylglycine unit of **1** is positioned to interact with the main chain amide NH of Glu166 (2.8 Å), the amide NH linking the bicyclic leucine isostere and the cycloglutamine unit of **1** is positioned to interact with the main chain amide carbonyl O-atom of His164 (2.9 Å), and the carbonyl O-atom of the cycloglutamine side chain of **1** is positioned to interact with an imidazole NH of the His163 side chain (2.6 Å). The thioimide N-atom of **1** is positioned to interact with the main chain NHs of Cys145 and Gly143 which form the oxyanion hole (distances of the thioimide N-atom to the Cys145 and Gly143 main chain NHs: 3.1 and 3.3 Å, respectively).

(a)

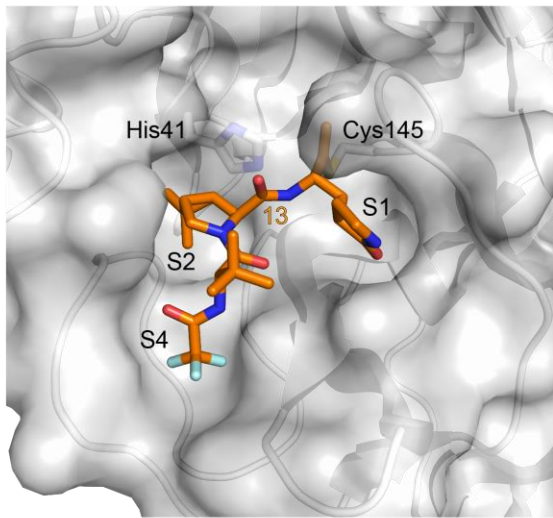

(b) SARS-CoV-2 M<sup>pro</sup>:13  
SARS-CoV-2 M<sup>pro</sup>:1

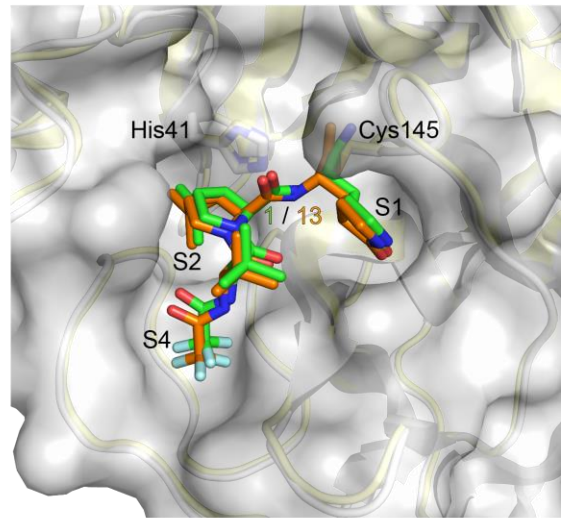

(c)

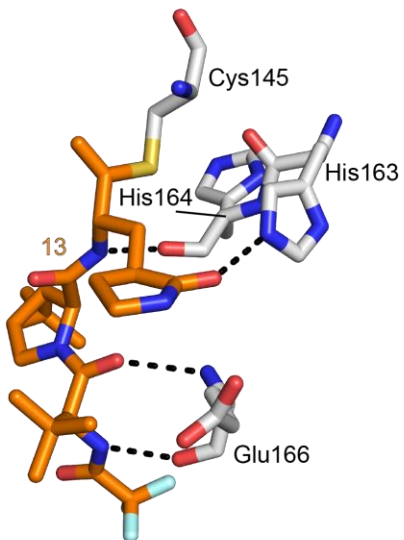

(d)

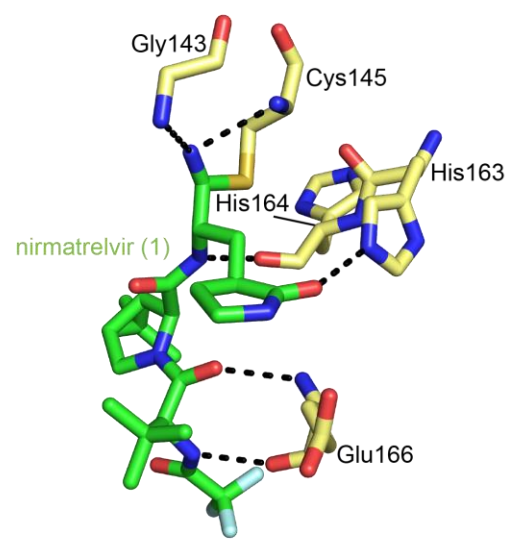

**Supporting Figure S9. Crystallographic analysis reveals that vinyl groups of vinyl thioethers formed with M<sup>pro</sup> Cys145 can occupy different conformations in/adjacent to the oxyanion hole (continues on the following page).** Color code: SARS-CoV-2 M<sup>pro</sup>: grey; carbon-backbone of **13** in complex with M<sup>pro</sup> is in orange; oxygen: red; nitrogen: blue; sulfur: yellow; fluorine: light blue. **(a)** Superimposition of a view from the M<sup>pro</sup>:**13** complex structure with one from the reported M<sup>pro</sup>:**44** complex structure (pale green: M<sup>pro</sup>; slate blue: carbon-backbone of **44** in complex with M<sup>pro</sup>; PDB ID: 5RG2<sup>15</sup>) reveals similar M<sup>pro</sup> conformations (RMSD = 0.503 Å). Note that the mechanism by which the corresponding bromoalkyne of **44** reacts with Cys145 has not been investigated; however, **44** may be a relatively non-specific inhibitor. **(b)** Superimposition of a view from the M<sup>pro</sup>:**13** complex structure with one from the reported M<sup>pro</sup>:**45** complex structure (pale pink: M<sup>pro</sup>; yellow: carbon-backbone of **45** in complex with M<sup>pro</sup>; PDB ID: 5RG3<sup>15</sup>) reveals overall similar M<sup>pro</sup> conformations (RMSD = 0.503 Å). Note that the mechanism by which the corresponding bromoalkyne of **45** reacts with Cys145 has not been investigated; however, **45** may be a relatively non-specific inhibitor. **(c)** The conformation of **44** in the M<sup>pro</sup> active site (PDB ID: 5RG2<sup>15</sup>) differs from that of **13** in complex with M<sup>pro</sup>. **44** is covalently bound to Cys145 as a thioether, its vinyl group faces into the oxyanion hole (distances of the terminal olefin C-atom to the Cys145 and Gly143 main chain NHs: 2.7 and 3.1 Å, respectively); by contrast, the vinyl group of **13** in complex with M<sup>pro</sup> projects out of the oxyanion hole. This observation may reflect the different binding modes of **13** and **44** with M<sup>pro</sup>, *i.e.* **44** is positioned to interact with the main chain of Thr26. **(d)** The conformation of **45** in the M<sup>pro</sup> active site (PDB ID: 5RG3<sup>15</sup>) differs from that of **13** in complex with M<sup>pro</sup>. **45** is covalently bound to Cys145 as a thioether, its vinyl group faces into the oxyanion hole (distances of the terminal olefin C-atom to the Cys145 and Gly143 main chain NHs: 2.9 and 2.9 Å, respectively); by contrast, the vinyl group of **13** in complex with M<sup>pro</sup> projects out of the oxyanion hole. This observation may reflect the different binding modes of **13** and **45** with M<sup>pro</sup>, *i.e.* **45** is positioned to interact with the main chain of Thr26.

(a) SARS-CoV-2 M<sup>pro</sup>:13  
SARS-CoV-2 M<sup>pro</sup>:44

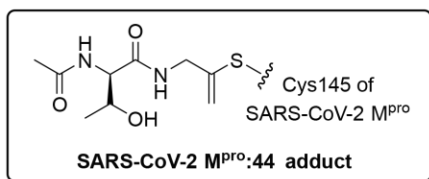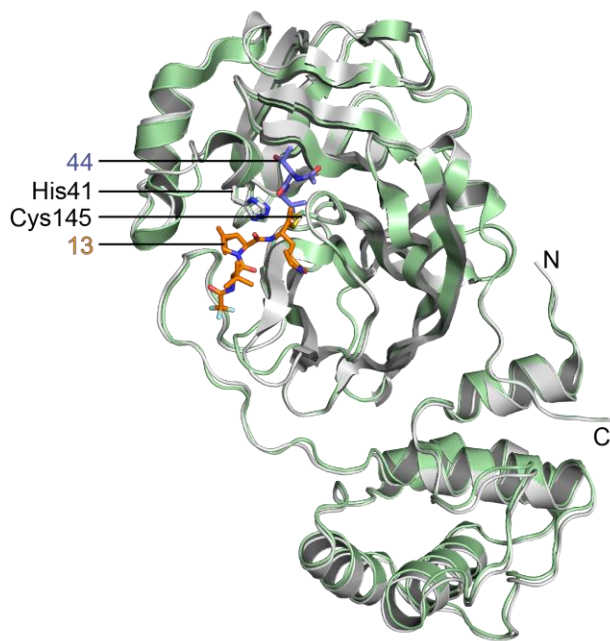

(b) SARS-CoV-2 M<sup>pro</sup>:13  
SARS-CoV-2 M<sup>pro</sup>:45

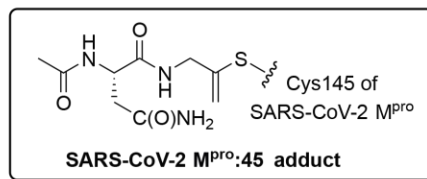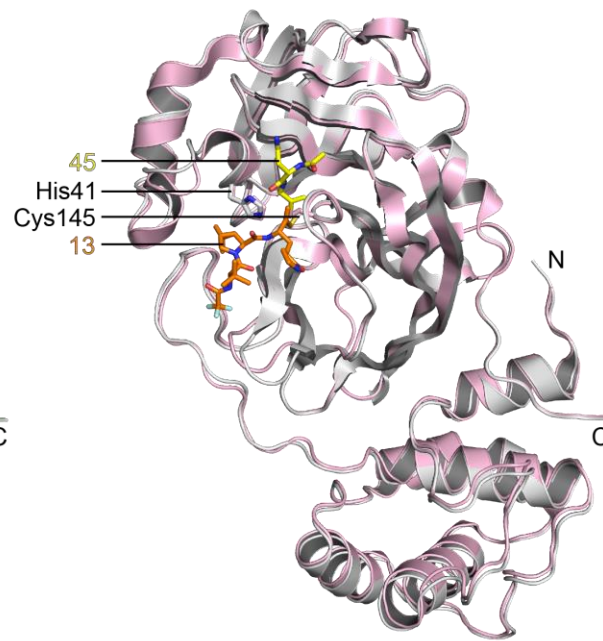

(c) SARS-CoV-2 M<sup>pro</sup>:13  
SARS-CoV-2 M<sup>pro</sup>:44

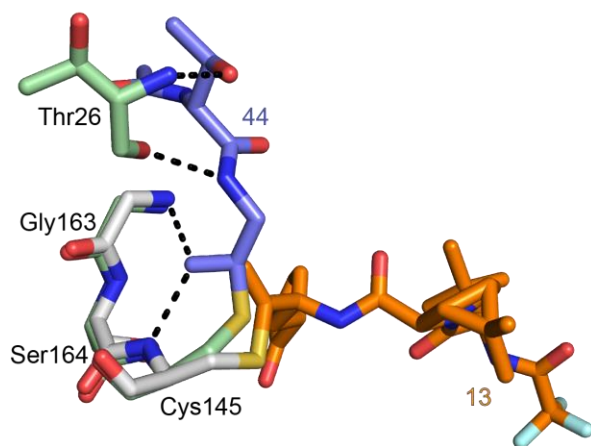

(d) SARS-CoV-2 M<sup>pro</sup>:13  
SARS-CoV-2 M<sup>pro</sup>:45

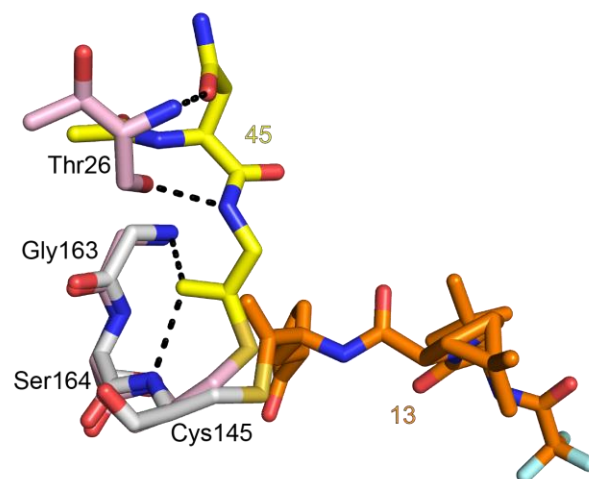

**Supporting Figure S10. Mass spectrometric evidence that nirmatrelvir reacts covalently with the nucleophilic Cys145 of SARS-CoV-2 M<sup>pro</sup>.** Protein-observed MS studies were performed as reported using SPE-MS.<sup>1-2</sup> Conditions: SARS-CoV-2 M<sup>pro</sup> (2.0 μM) was incubated with nirmatrelvir<sup>8</sup> (**1**; 10 μM) in buffer (20 mM HEPES, pH 7.5; 50 μL total reaction volume) for 90 min at ambient temperature, before stopping the reaction by addition of 1%<sub>v/v</sub> aqueous formic acid (5 μL) and analysis by SPE-MS using reported parameters.<sup>1-2</sup>

Nirmatrelvir (**1**) reacts covalently with SARS-CoV-2 M<sup>pro</sup> as revealed by the anticipated ~500 Da mass shift with respect to unmodified M<sup>pro</sup> (33796 Da), an observation which is in accord with crystallographic analysis showing selective reaction with the nucleophilic Cys145 (Figure 1). Note that the minor peak corresponding to a second M<sup>pro</sup> modification (*i.e.* 34796 Da) may be an artefact due to non-active site binding.

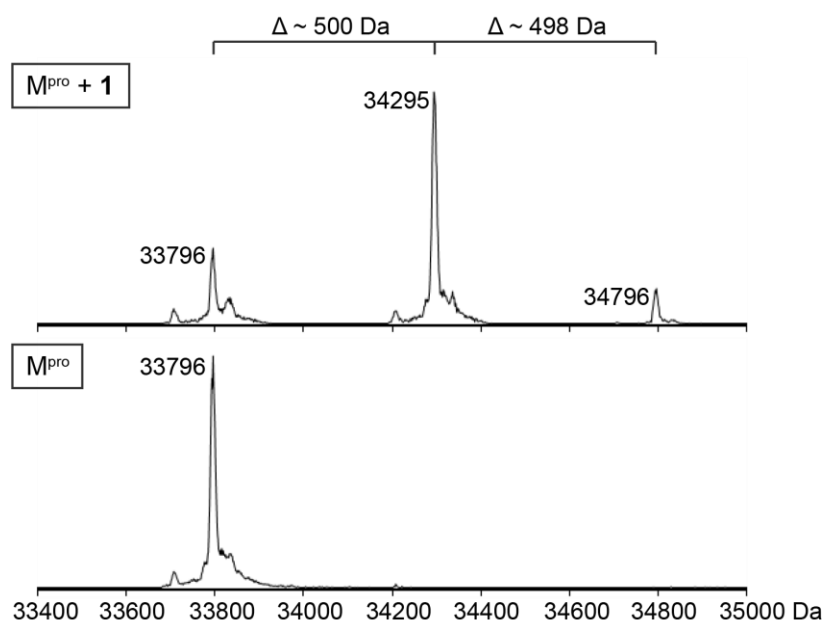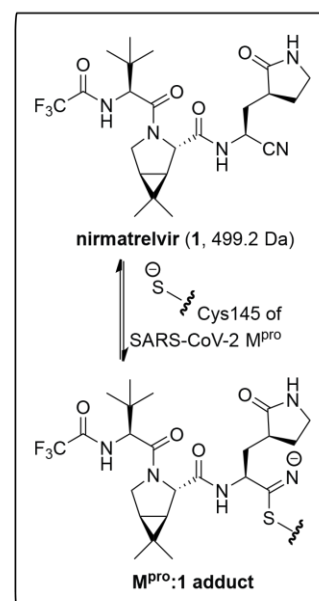

**Supporting Figure S11. Mass spectrometric evidence that alkyne **13** reacts covalently with the nucleophilic Cys145 of SARS-CoV-2 M<sup>pro</sup>.** Protein-observed MS studies were performed as reported using SPE-MS.<sup>1,2</sup> Conditions: SARS-CoV-2 M<sup>pro</sup> (2.0  $\mu$ M) was incubated with nirmatrelvir derivative **13** (10  $\mu$ M) in buffer (20 mM HEPES, pH 7.5; 50  $\mu$ L total reaction volume) for 90 min at ambient temperature, before stopping the reaction by addition of 1%<sub>v/v</sub> aqueous formic acid (5  $\mu$ L) and analysis by SPE-MS using reported parameters.<sup>1-2</sup>

The alkyne **13** reacts covalently with SARS-CoV-2 M<sup>pro</sup> as revealed by the anticipated  $\sim$ 502 Da mass shift with respect to unmodified M<sup>pro</sup> (33796 Da), an observation which is in accord with crystallographic analysis showing selective reaction with the nucleophilic Cys145 (Figure 4). Note that the minor peak corresponding to a second M<sup>pro</sup> modification (*i.e.* 34793 Da) may be an artefact due to non-active site binding. The results indicate that **13** reacts with M<sup>pro</sup> to completion within 90 min.

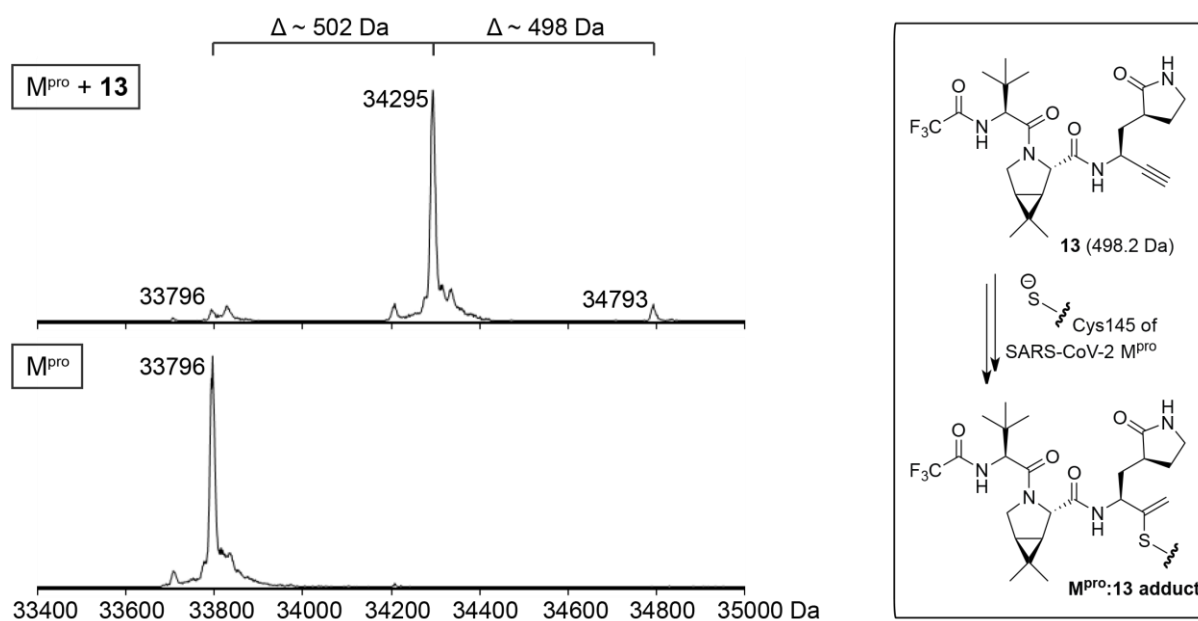

**Supporting Figure S12. Mass spectrometric evidence that methionine alkyne **14** reacts covalently with the nucleophilic Cys145 of SARS-CoV-2 M<sup>pro</sup>.** Protein-observed MS studies were performed as reported using SPE-MS.<sup>1-2</sup> Conditions: SARS-CoV-2 M<sup>pro</sup> (2.0  $\mu$ M) was incubated with nirmatrelvir derivative **14** (10  $\mu$ M) in buffer (20 mM HEPES, pH 7.5; 50  $\mu$ L total reaction volume) for 90 min at ambient temperature, before stopping the reaction by addition of 1%<sub>v/v</sub> aqueous formic acid (5  $\mu$ L) and analysis by SPE-MS using reported parameters.<sup>1-2</sup> The methionine alkyne derivative **14** reacts covalently with SARS-CoV-2 M<sup>pro</sup> as revealed by the anticipated  $\sim$ 475 Da mass shift with respect to unmodified M<sup>pro</sup> (33796 Da), likely with the nucleophilic Cys145 as crystallographically observed by reaction of alkyne **13** with M<sup>pro</sup> (Figure 4). Alkyne **14** appears to react less efficiently with M<sup>pro</sup> than alkyne **13**, in accord with its  $\sim$ 85-fold higher IC<sub>50</sub> value (Table 1).

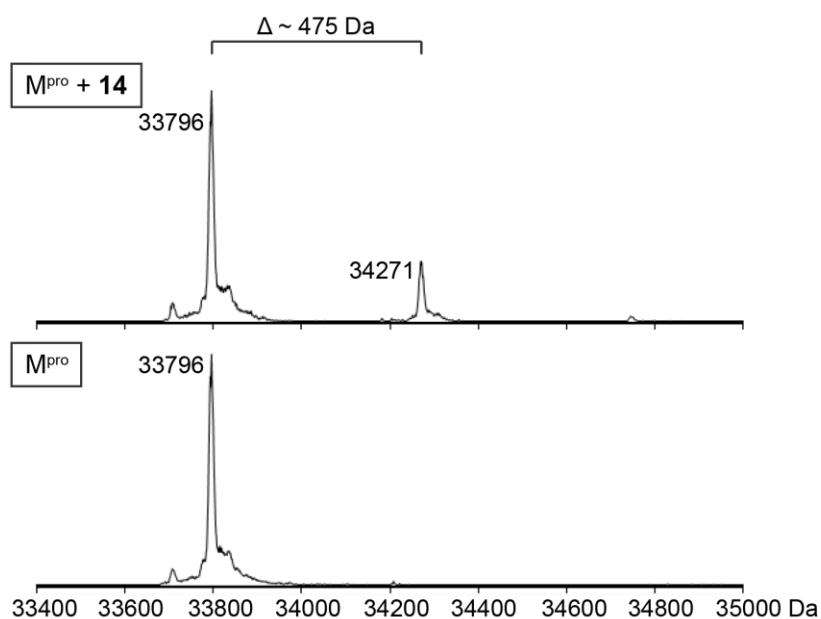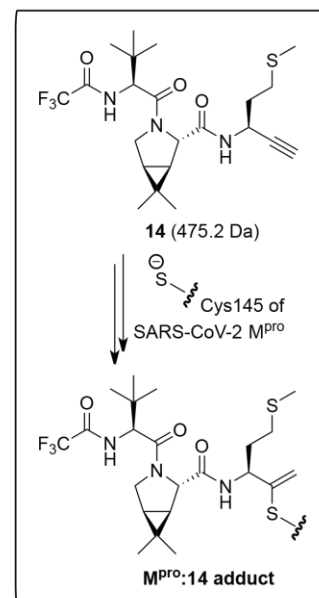

**Supporting Figure S13. Mass spectrometric evidence that methionine nitrile **15** reacts covalently with the nucleophilic Cys145 of SARS-CoV-2 M<sup>pro</sup>.** Protein-observed MS studies were performed as reported using SPE-MS.<sup>1-2</sup> Conditions: SARS-CoV-2 M<sup>pro</sup> (2.0  $\mu$ M) was incubated with nirmatrelvir derivative **15** (10  $\mu$ M) in buffer (20 mM HEPES, pH 7.5; 50  $\mu$ L total reaction volume) for 90 min at ambient temperature, before stopping the reaction by addition of 1%<sub>v/v</sub> aqueous formic acid (5  $\mu$ L) and analysis by SPE-MS using reported parameters.<sup>1-2</sup> The methionine nitrile **15** reacts covalently with SARS-CoV-2 M<sup>pro</sup> as revealed by the anticipated  $\sim$ 476 Da mass shift with respect to unmodified M<sup>pro</sup> (33796 Da), likely with the nucleophilic Cys145 as crystallographically observed by reaction of **1** with M<sup>pro</sup> (Figure 1). Nitrile **15** appears to react less efficiently with M<sup>pro</sup> than nitrile **1**, in accord with its  $\sim$ 35-fold higher IC<sub>50</sub> value (Table 1). Note that the minor peak corresponding to a second M<sup>pro</sup> modification (*i.e.* 34796 Da) may be an artefact due to non-active site binding.

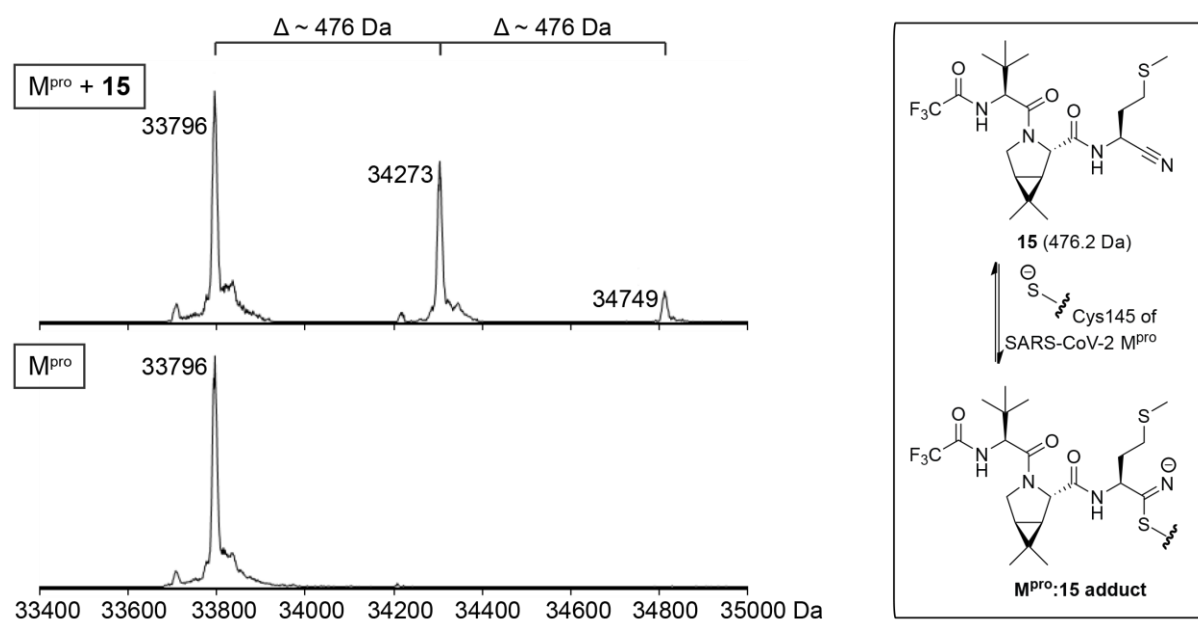



**Supporting Figure S14. Mass spectrometric evidence that the MI-09 alkyne derivative **18** reacts covalently with the nucleophilic Cys145 of SARS-CoV-2 M<sup>pro</sup>.** Protein-observed MS studies were performed as reported using SPE-MS.<sup>1-2</sup> Conditions: SARS-CoV-2 M<sup>pro</sup> (2.0 μM) was incubated with MI-09<sup>13</sup> derivative **18** (10 μM) in buffer (20 mM HEPES, pH 7.5; 50 μL total reaction volume) for 90 min at ambient temperature, before stopping the reaction by addition of 1%<sub>v/v</sub> aqueous formic acid (5 μL) and analysis by SPE-MS using reported parameters.<sup>1-2</sup>

The MI-09<sup>13</sup> alkyne derivative **18** reacts covalently with SARS-CoV-2 M<sup>pro</sup> as revealed by the anticipated ~508 Da mass shift with respect to unmodified M<sup>pro</sup> (33796 Da), likely with the nucleophilic Cys145 as crystallographically observed by reaction of alkyne **13** with M<sup>pro</sup> (Figure 4). Alkyne **18** appears to react less efficiently with M<sup>pro</sup> than alkyne **13**, in accord with its ~20-fold higher IC<sub>50</sub> value (Table 2). Note that the minor peak corresponding to a second M<sup>pro</sup> modification (*i.e.* 34810 Da) may be an artefact due to non-active site binding.

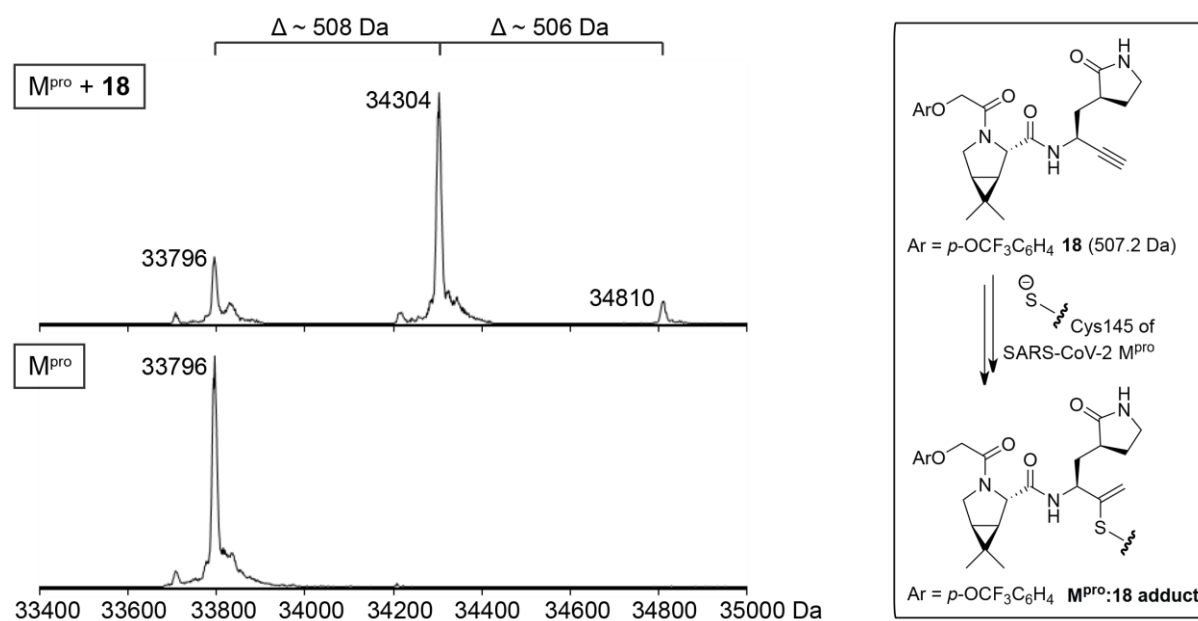

**Supporting Figure S15. Mass spectrometric evidence that the MI-09 alkyne derivative **19** reacts covalently with the nucleophilic Cys145 of SARS-CoV-2 M<sup>pro</sup>.** Protein-observed MS studies were performed as reported using SPE-MS.<sup>1-2</sup> Conditions: SARS-CoV-2 M<sup>pro</sup> (2.0  $\mu$ M) was incubated with MI-09<sup>13</sup> derivative **19** (10  $\mu$ M) in buffer (20 mM HEPES, pH 7.5; 50  $\mu$ L total reaction volume) for 90 min at ambient temperature, before stopping the reaction by addition of 1%<sub>v/v</sub> aqueous formic acid (5  $\mu$ L) and analysis by SPE-MS using reported parameters.<sup>1-2</sup>

The MI-09<sup>13</sup> alkyne derivative **19** reacts covalently with SARS-CoV-2 M<sup>pro</sup> as revealed by the anticipated  $\sim$ 491 Da mass shift with respect to unmodified M<sup>pro</sup> (33796 Da), likely with the nucleophilic Cys145 as crystallographically observed by reaction of alkyne **13** with M<sup>pro</sup> (Figure 4). Alkyne **19** appears to react less efficiently with M<sup>pro</sup> than alkyne **13**, in accord with its  $\sim$ 20-fold higher IC<sub>50</sub> value (Table 2). Note that the minor peak corresponding to a second M<sup>pro</sup> modification (*i.e.* 34779 Da) may be an artefact due to non-active site binding.

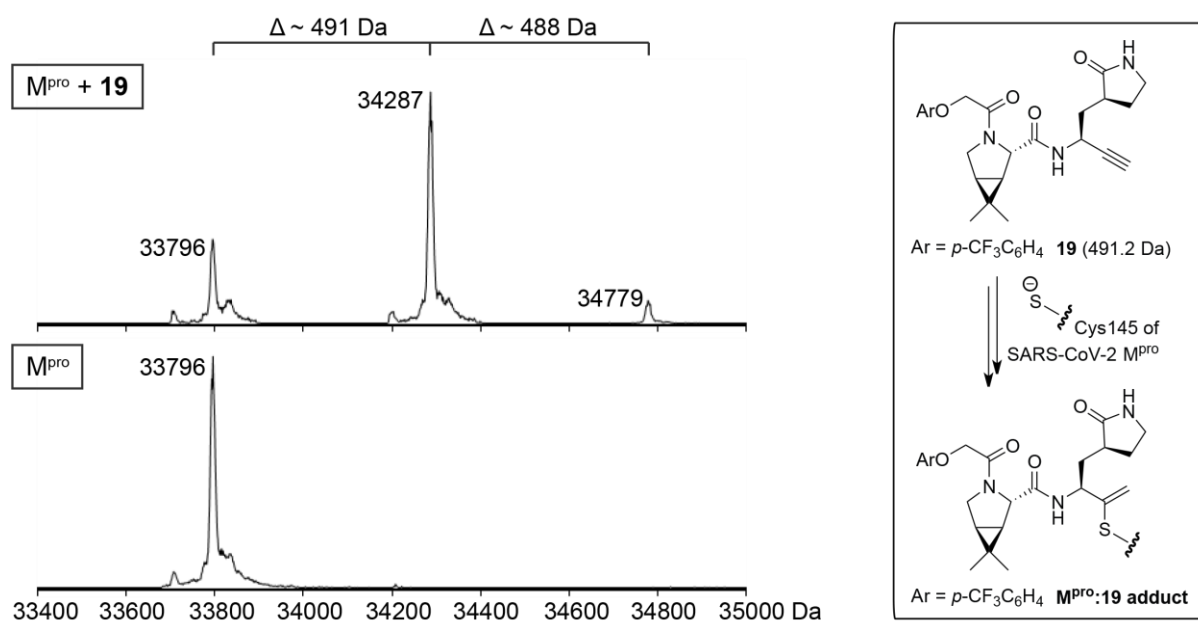

**Supporting Figure S16. Mass spectrometric evidence that the MI-09 nitrile derivative **20** reacts covalently with the nucleophilic Cys145 of SARS-CoV-2 M<sup>pro</sup>.** Protein-observed MS studies were performed as reported using SPE-MS.<sup>1-2</sup> Conditions: SARS-CoV-2 M<sup>pro</sup> (2.0 μM) was incubated with MI-09<sup>13</sup> derivative **20** (10 μM) in buffer (20 mM HEPES, pH 7.5; 50 μL total reaction volume) for 90 min at ambient temperature, before stopping the reaction by addition of 1%<sub>v/v</sub> aqueous formic acid (5 μL) and analysis by SPE-MS using reported parameters.<sup>1-2</sup>

The MI-09<sup>13</sup> nitrile derivative **20** reacts covalently with SARS-CoV-2 M<sup>pro</sup> as revealed by the anticipated ~509 Da mass shift with respect to unmodified M<sup>pro</sup> (33796 Da), likely with the nucleophilic Cys145 as crystallographically observed by reaction of **1** with M<sup>pro</sup> (Figure 1). Nitrile **15** appears to react less efficiently with M<sup>pro</sup> than nitrile **1**, in accord with its ~5-fold higher IC<sub>50</sub> value (Tables 1 and 2). Note that the minor peak corresponding to a second M<sup>pro</sup> modification (*i.e.* 34812 Da) may be an artefact due to non-active site binding.

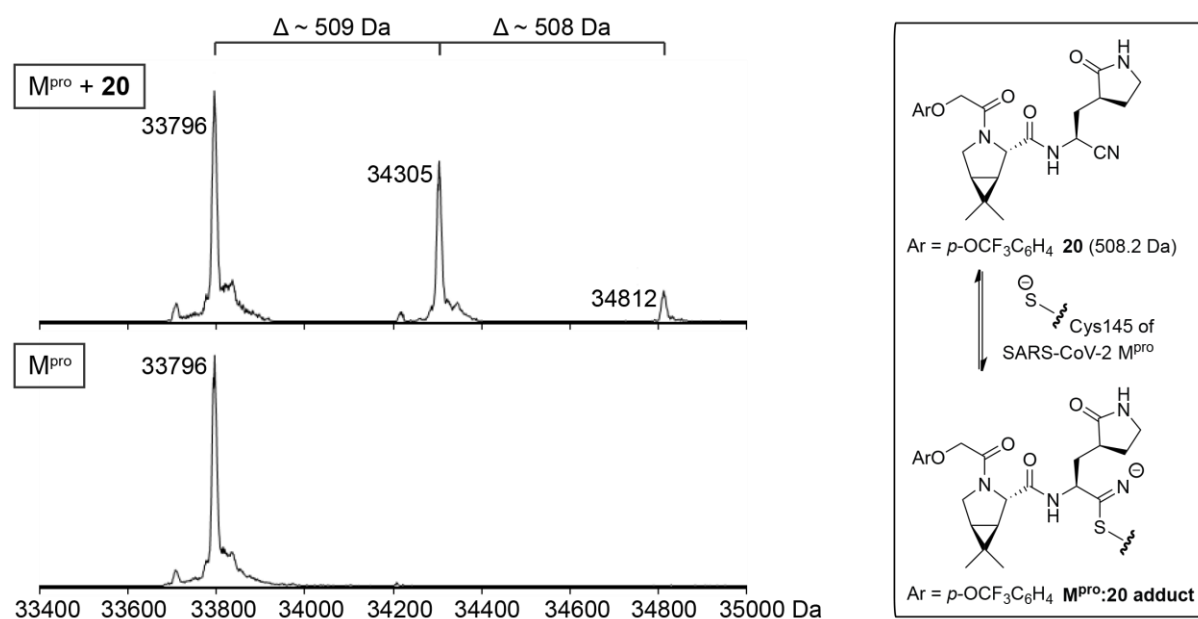

**Supporting Figure S17. Mass spectrometric evidence that the MI-09 nitrile derivative **21** reacts covalently with the nucleophilic Cys145 of SARS-CoV-2 M<sup>pro</sup>.** Protein-observed MS studies were performed as reported using SPE-MS.<sup>1-2</sup> Conditions: SARS-CoV-2 M<sup>pro</sup> (2.0  $\mu$ M) was incubated with MI-09<sup>13</sup> derivative **21** (10  $\mu$ M) in buffer (20 mM HEPES, pH 7.5; 50  $\mu$ L total reaction volume) for 90 min at ambient temperature, before stopping the reaction by addition of 1%<sub>v/v</sub> aqueous formic acid (5  $\mu$ L) and analysis by SPE-MS using reported parameters.<sup>1-2</sup>

The MI-09<sup>13</sup> nitrile derivative **21** reacts covalently with SARS-CoV-2 M<sup>pro</sup> as revealed by the anticipated  $\sim$ 491 Da mass shift with respect to unmodified M<sup>pro</sup> (33796 Da), likely with the nucleophilic Cys145 as crystallographically observed by reaction of **1** with M<sup>pro</sup> (Figure 1). Nitrile **15** appears to react less efficiently with M<sup>pro</sup> than nitrile **1**, in accord with its  $\sim$ 5-fold higher IC<sub>50</sub> value (Tables 1 and 2), but with similar efficiency as nitrile **20**. Note that the minor peak corresponding to a second M<sup>pro</sup> modification (*i.e.* 34779 Da) may be an artefact due to non-active site binding.

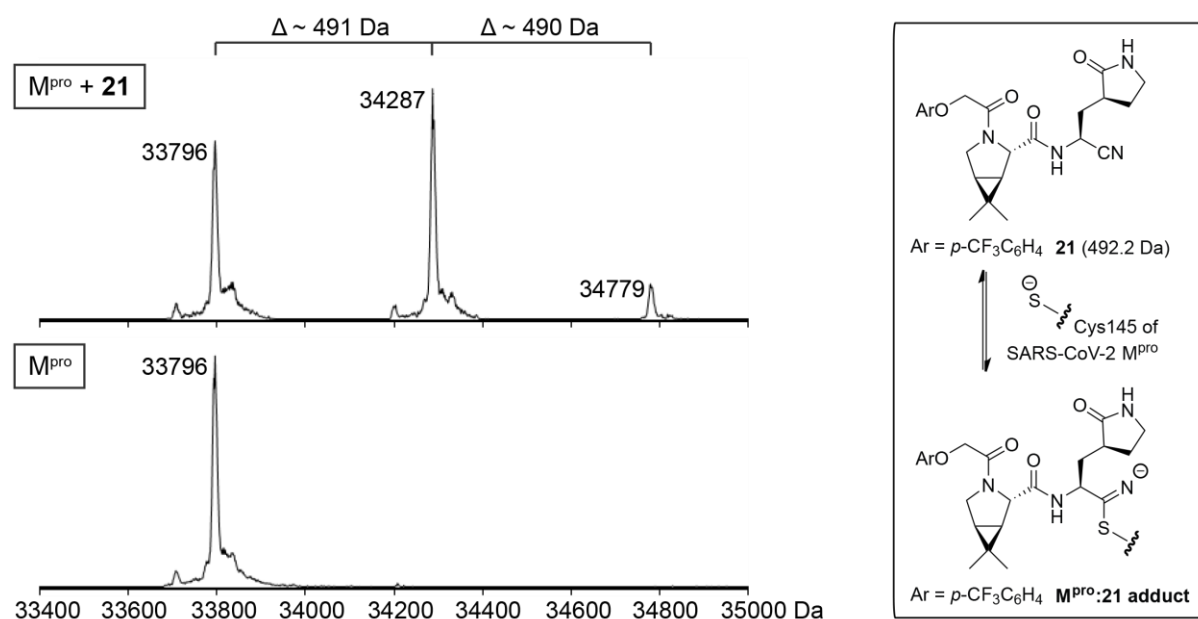

**Supporting Figure S18. Mass spectrometric evidence that the GC376 alkyne derivative **23** reacts covalently with the nucleophilic Cys145 of SARS-CoV-2 M<sup>pro</sup>.** Protein-observed MS studies were performed as reported using SPE-MS.<sup>1-2</sup> Conditions: SARS-CoV-2 M<sup>pro</sup> (2.0  $\mu$ M) was incubated with GC376<sup>16</sup> derivative **23** (10  $\mu$ M) in buffer (20 mM HEPES, pH 7.5; 50  $\mu$ L total reaction volume) for 90 min at ambient temperature, before stopping the reaction by addition of 1%<sub>v/v</sub> aqueous formic acid (5  $\mu$ L) and analysis by SPE-MS using reported parameters.<sup>1-2</sup>

The GC376<sup>16</sup> alkyne derivative **23** reacts covalently with SARS-CoV-2 M<sup>pro</sup> as revealed by the anticipated  $\sim$ 399 Da mass shift with respect to unmodified M<sup>pro</sup> (33796 Da), likely with the nucleophilic Cys145 as crystallographically observed by reaction of alkyne **13** with M<sup>pro</sup> (Figure 4). Alkyne **23** appears to react less efficiently with M<sup>pro</sup> than alkyne **13**, in accord with its  $\sim$ 30-fold higher IC<sub>50</sub> value (Tables 1 and 2).

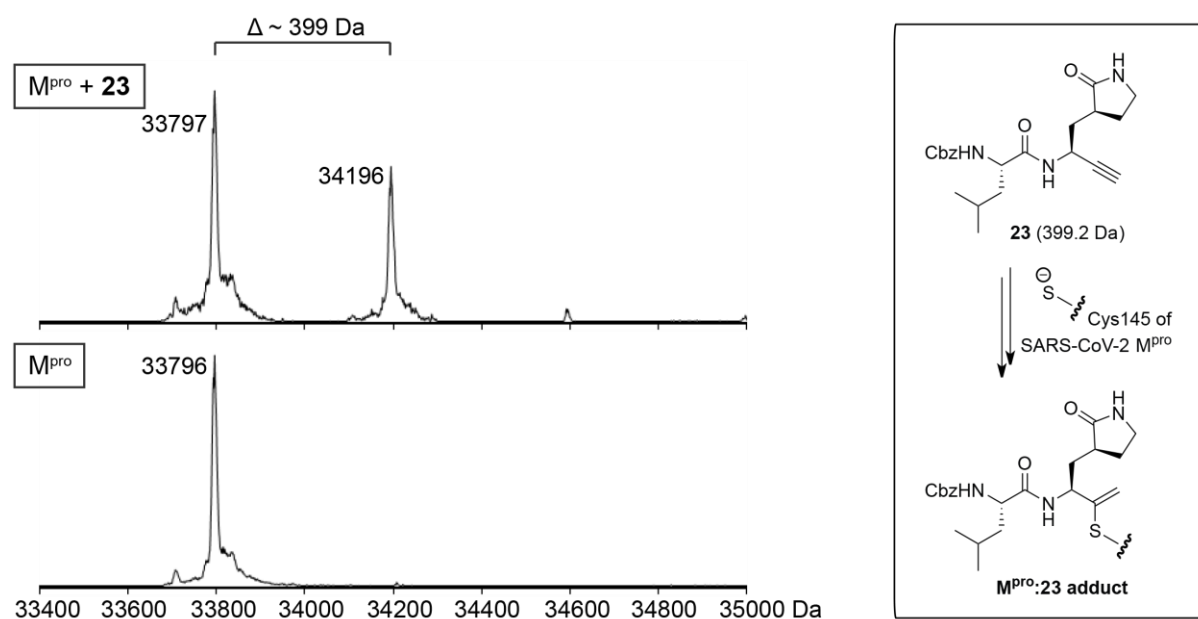

**Supporting Figure S19. Mass spectrometric evidence that the alkyne **27a** reacts covalently with the nucleophilic Cys145 of SARS-CoV-2 M<sup>pro</sup>.** Protein-observed MS studies were performed as reported using SPE-MS.<sup>1-2</sup> Conditions: SARS-CoV-2 M<sup>pro</sup> (2.0  $\mu$ M) was incubated with nirmatrelvir derivative **27a** (10  $\mu$ M) in buffer (20 mM HEPES, pH 7.5; 50  $\mu$ L total reaction volume) for 90 min at ambient temperature, before stopping the reaction by addition of 1%<sub>v/v</sub> aqueous formic acid (5  $\mu$ L) and analysis by SPE-MS using reported parameters.<sup>1-2</sup> The alkyne derivative **27a** reacts covalently with SARS-CoV-2 M<sup>pro</sup> as revealed by the anticipated  $\sim$ 572 Da mass shift with respect to unmodified M<sup>pro</sup> (33796 Da), likely with the nucleophilic Cys145 as crystallographically observed by reaction of alkyne **13** with M<sup>pro</sup> (Figure 4). Alkyne **27a** appears to react substantially less efficiently with M<sup>pro</sup> than alkyne **13**, in accord with its  $\sim$ 80-fold higher IC<sub>50</sub> value (Tables 1 and 3).

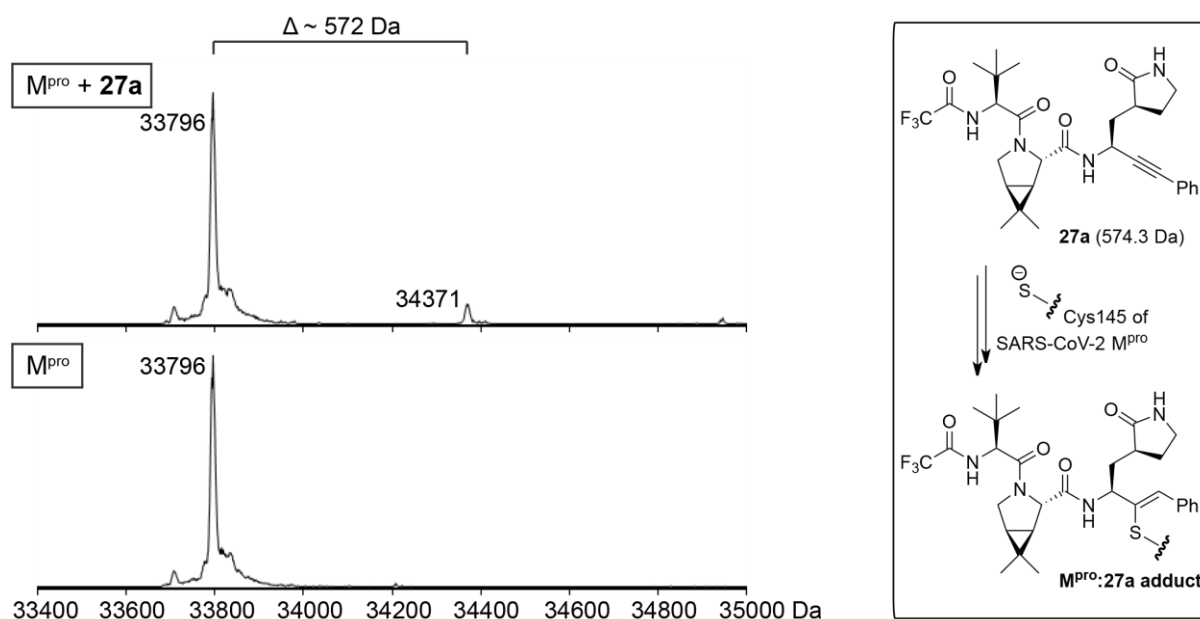

**Supporting Figure S20. Mass spectrometric evidence that the alkyne **27b** reacts covalently with the nucleophilic Cys145 of SARS-CoV-2 M<sup>pro</sup>.** Protein-observed MS studies were performed as reported using SPE-MS.<sup>1-2</sup> Conditions: SARS-CoV-2 M<sup>pro</sup> (2.0  $\mu$ M) was incubated with nirmatrelvir derivative **27b** (10  $\mu$ M) in buffer (20 mM HEPES, pH 7.5; 50  $\mu$ L total reaction volume) for 90 min at ambient temperature, before stopping the reaction by addition of 1%<sub>v/v</sub> aqueous formic acid (5  $\mu$ L) and analysis by SPE-MS using reported parameters.<sup>1-2</sup> The alkyne derivative **27b** reacts covalently with SARS-CoV-2 M<sup>pro</sup> as revealed by the anticipated  $\sim$ 619 Da mass shift with respect to unmodified M<sup>pro</sup> (33796 Da), likely with the nucleophilic Cys145 as crystallographically observed by reaction of alkyne **13** with M<sup>pro</sup> (Figure 4). Alkyne **27b** appears to react substantially less efficiently with M<sup>pro</sup> than alkyne **13**, in accord with its  $\sim$ 50-fold higher IC<sub>50</sub> value, but apparently slightly more efficient than alkyne **27a** (Tables 1 and 3).

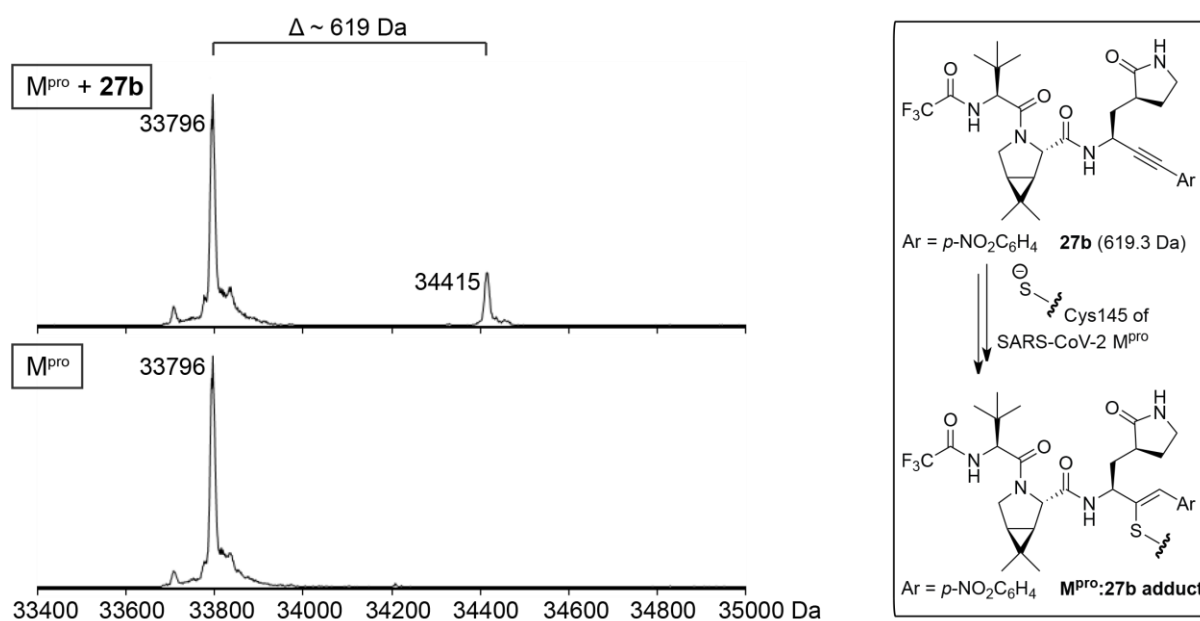

**Supporting Figure S21. Mass spectrometric evidence that the alkyne **28** reacts covalently with the nucleophilic Cys145 of SARS-CoV-2 M<sup>pro</sup>.** Protein-observed MS studies were performed as reported using SPE-MS.<sup>1-2</sup> Conditions: SARS-CoV-2 M<sup>pro</sup> (2.0  $\mu$ M) was incubated with nirmatrelvir derivative **28** (10  $\mu$ M) in buffer (20 mM HEPES, pH 7.5; 50  $\mu$ L total reaction volume) for 90 min at ambient temperature, before stopping the reaction by addition of 1%<sub>v/v</sub> aqueous formic acid (5  $\mu$ L) and analysis by SPE-MS using reported parameters.<sup>1-2</sup> The alkyne derivative **28** reacts covalently with SARS-CoV-2 M<sup>pro</sup> as revealed by the anticipated  $\sim$ 572 Da mass shift with respect to unmodified M<sup>pro</sup> (33796 Da), likely with the nucleophilic Cys145 as crystallographically observed by reaction of alkyne **13** with M<sup>pro</sup> (Figure 4). Alkyne **28** appears to react substantially less efficiently with M<sup>pro</sup> than alkyne **13**, despite their similar IC<sub>50</sub> values (Tables 1 and 3). Note, however, that time course experiments have not yet been performed to validate this observation.

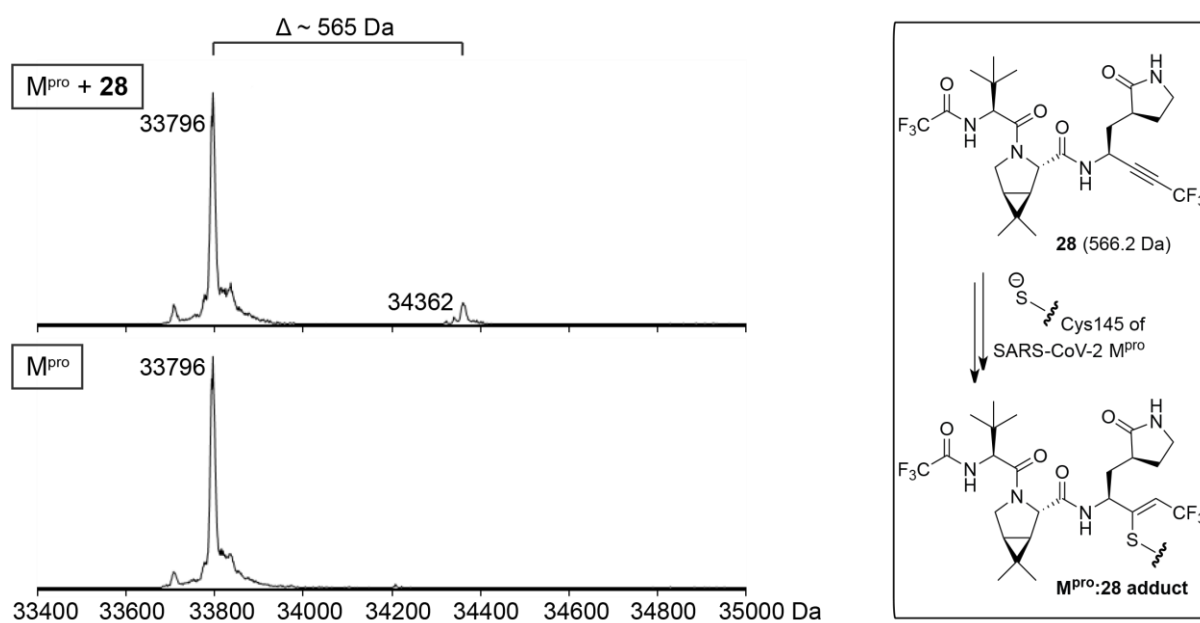



## 2. Supporting Tables

**Supporting Table S1. Cell viability assays indicate that nirmatrelvir and selected derivatives are not cytotoxic over the tested concentration range.**

|     | Nirmatrelvir derivative | <sup>a)</sup> Cytotoxicity [ $\mu$ M] |
|-----|-------------------------|---------------------------------------|
| i   | <br>nirmatrelvir (1)    | >100                                  |
| ii  | <br>13                  | >100                                  |
| iii | <br>15                  | >100                                  |

a) Inhibitor toxicity was assayed using the MTT (3-(4,5-dimethylthiazol-2-yl)-2,5-diphenyltetrazolium bromide) Cell Proliferation assay kit (Abcam – Ab211091) as per the manufacturers' recommendation (for details, see Experimental Section). Results are a mean of independent triplicates (n = 3; mean  $\pm$  standard deviation, SD).

**Supporting Table S2. Alkyne- and nitrile bearing SARS-CoV-2 M<sup>pro</sup> inhibitors retain activity against the S144A SARS-CoV-2 M<sup>pro</sup> variant (continues on the following page).** SPE-MS SARS-CoV-2 M<sup>pro</sup> inhibition assays were performed as described (Experimental Section). Note that the S144A M<sup>pro</sup> inhibition assays differed from those of wildtype (WT) M<sup>pro</sup> by use of twice the M<sup>pro</sup> concentration (0.1 μM instead of 0.05 μM used for WT M<sup>pro</sup>).

Consistent with the literature,<sup>17-18</sup> the SPE-MS results reveal that nirmatrelvir (**1**) inhibits S144A M<sup>pro</sup> less efficiently than WT M<sup>pro</sup> (~4-fold; Entry i). Similarly, the inhibition efficiency of the alkyne derivatives **13**, **14**, and **28** for inhibiting S144A M<sup>pro</sup> decreased ~4- to ~6-fold compared to WT M<sup>pro</sup> (Entries, ii, iii, and xii), whereas the inhibition efficiency of the phenyl-capped derivatives **27a** and **27b** appeared to decrease less (Entries x and xi). Note, however, that the standard deviation of the inhibition results obtained for S144A M<sup>pro</sup> appeared to be higher than those obtained for WT M<sup>pro</sup>, which, at least in part, reflects the reduced robustness of the S144A M<sup>pro</sup> inhibition assay as indicated by typically lower Z'-factors<sup>12</sup> than observed for the WT M<sup>pro</sup> inhibition assays (Supporting Figure S5); however, Z'-factors<sup>12</sup> of the S144A M<sup>pro</sup> inhibition assays were >0.5.

Interestingly, MI-09<sup>13</sup> derived nitrile **20** appeared to inhibit S144A M<sup>pro</sup> ~20-fold less efficiently than WT M<sup>pro</sup>, whereas the corresponding alkyne **18** appeared to inhibit S144A M<sup>pro</sup> only ~3-fold less efficiently than WT M<sup>pro</sup> (Entries iv and v). This observation indicates that the effect of M<sup>pro</sup> active site variations on the inhibition efficiency of alkyne- and nitrile-based inhibitors may differ. This observation also highlights the possibility that alkyne-based inhibitors of WT M<sup>pro</sup> and M<sup>pro</sup> active site variants can be developed that are more efficient than nirmatrelvir or other covalent inhibitors with functional groups other than nitriles, provided that the P2-P4 equivalent positions are carefully optimized. By contrast, GC376 (**3**)<sup>16</sup> and its alkyne derivative **23** both inhibited S144A M<sup>pro</sup> ~3-fold less efficiently than WT M<sup>pro</sup> (Entries viii and ix).

|     | SARS-CoV-2 M <sup>pro</sup> inhibitor                                                                            | <sup>a</sup> IC <sub>50</sub> WT M <sup>pro</sup> [μM] | <sup>b</sup> IC <sub>50</sub> S144A M <sup>pro</sup> [μM] |    | SARS-CoV-2 M <sup>pro</sup> inhibitor                                                                                                                   | <sup>a</sup> IC <sub>50</sub> WT M <sup>pro</sup> [μM] | <sup>b</sup> IC <sub>50</sub> S144A M <sup>pro</sup> [μM] |
|-----|------------------------------------------------------------------------------------------------------------------|--------------------------------------------------------|-----------------------------------------------------------|----|---------------------------------------------------------------------------------------------------------------------------------------------------------|--------------------------------------------------------|-----------------------------------------------------------|
| i   | 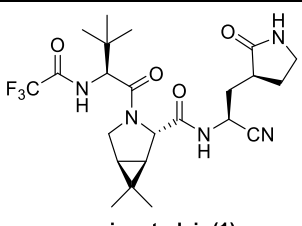<br>nirmatrelvir ( <b>1</b> ) | ≤0.025                                                 | 0.09 ± 0.01                                               | iv | <br>Ar = p-OCF <sub>3</sub> C <sub>6</sub> H <sub>4</sub> <b>20</b> | 0.16 ± 0.03                                            | 3.2 ± 0.8                                                 |
| ii  | <br><b>13</b>                 | 0.14 ± 0.03                                            | 0.58 ± 0.14                                               | v  | <br>Ar = p-OCF <sub>3</sub> C <sub>6</sub> H <sub>4</sub> <b>18</b> | 2.8 ± 0.8                                              | 7.5 ± 3.1                                                 |
| iii | <br><b>14</b>                 | 11.9 ± 1.2                                             | 49.8 ± 17.4                                               | vi | <br>Ar = p-CF <sub>3</sub> C <sub>6</sub> H <sub>4</sub> <b>19</b>  | 3.0 ± 0.4                                              | 14.5 ± 11.9                                               |

|      | SARS-CoV-2 M <sup>pro</sup> inhibitor                                                                                                                       | <sup>a)</sup> IC <sub>50</sub> WT M <sup>pro</sup> [ $\mu$ M] | <sup>b)</sup> IC <sub>50</sub> S144A M <sup>pro</sup> [ $\mu$ M] |     | SARS-CoV-2 M <sup>pro</sup> inhibitor                                                            | <sup>a)</sup> IC <sub>50</sub> WT M <sup>pro</sup> [ $\mu$ M] | <sup>b)</sup> IC <sub>50</sub> S144A M <sup>pro</sup> [ $\mu$ M] |
|------|-------------------------------------------------------------------------------------------------------------------------------------------------------------|---------------------------------------------------------------|------------------------------------------------------------------|-----|--------------------------------------------------------------------------------------------------|---------------------------------------------------------------|------------------------------------------------------------------|
| vii  | 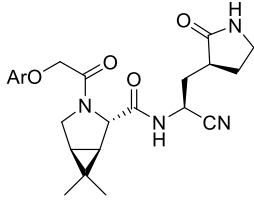<br>Ar = <i>p</i> -CF <sub>3</sub> C <sub>6</sub> H <sub>4</sub> <b>21</b> | 0.16 ± 0.05                                                   | 4.4 ± 1.4                                                        | x   | <br><b>27a</b> | 11.0 ± 3.5                                                    | 15.8 ± 10.3                                                      |
| viii | <br><b>GC376 (3)</b>                                                       | ≤0.025                                                        | 0.08 ± 0.01                                                      | xi  | <br><b>27b</b> | 7.1 ± 2.6                                                     | 20.1 ± 12.2                                                      |
| ix   | <br><b>23</b>                                                             | 4.7 ± 1.8                                                     | 14.0 ± 8.1                                                       | xii | <br><b>28</b> | 0.23 ± 0.02                                                   | 1.3 ± 0.2                                                        |

a) Inhibition assays were performed using SPE-MS as described employing SARS-CoV-2 M<sup>pro</sup> (0.05  $\mu$ M) and ALNDFSNSGSDVLYQPPQTSITS AVLQ/SGFRKMAFPS-NH<sub>2</sub> as a substrate (2.0  $\mu$ M) in the presence of an internal standard (Supporting Figures S1 and S2);<sup>1-2</sup> b) S144A SARS-CoV-2 M<sup>pro</sup> inhibition assays were performed using SPE-MS employing SARS-CoV-2 S144A M<sup>pro</sup> (0.1  $\mu$ M) and ALNDFSNSGSDVLYQPPQTSITS AVLQ/SGFRKMAFPS-NH<sub>2</sub> as a substrate (2.0  $\mu$ M) in the presence of an internal standard as described for WT M<sup>pro</sup>; note that the concentration of S144A M<sup>pro</sup> was double that of WT M<sup>pro</sup> to account for its reduced catalytic activity. Data are presented as a mean of independent triplicates, each composed of technical duplicates (n = 3; mean ± SD).

**Supporting Table S3. Alkyne- and nitrile bearing SARS-CoV-2 M<sup>pro</sup> inhibitors do not inhibit SARS-CoV-2 PL<sup>pro</sup> (continues on the following page).** SPE-MS SARS-CoV-2 PL<sup>pro</sup> inhibition assays were performed as reported using isolated recombinant PL<sup>pro</sup>.<sup>3</sup> Ebselen (Entry i), which is a reported efficient M<sup>pro</sup> and PL<sup>pro</sup> inhibitor, was used as a positive inhibition control and inhibits PL<sup>pro</sup> in the expected range (IC<sub>50</sub> ~ 0.1 μM, Entry i; reported IC<sub>50</sub> ~ 0.3 μM<sup>3</sup>).

Nirmatrelvir (1) and the other trialed nitrile-bearing SARS-CoV-2 M<sup>pro</sup> inhibitors **15**, **20**, and **21** did not inhibit PL<sup>pro</sup> over the tested concentration range (Entries ii-v), in accord with the reported lack of PL<sup>pro</sup> inhibition by **1**.<sup>3</sup> Although covalent alkyne SARS-CoV-2 PL<sup>pro</sup> inhibitors have been reported,<sup>19-20</sup> alkyne derivatives **13**, **14**, **27a**, **27b**, and **28** did not inhibit PL<sup>pro</sup> over the tested concentration range (Entries vi-x). In addition, neither the MI-09<sup>13</sup> derived alkynes **18** and **19**, nor GC376 (**3**)<sup>16</sup> and its alkyne derivative **23** inhibited isolated recombinant SARS-CoV-2 PL<sup>pro</sup> at substantial levels (Entries xi-xiv).

|     | SARS-CoV-2 M <sup>pro</sup> inhibitor                                                                                                                          | <sup>a</sup> IC <sub>50</sub> [μM] |      | SARS-CoV-2 M <sup>pro</sup> inhibitor                                                              | <sup>a</sup> IC <sub>50</sub> [μM] |
|-----|----------------------------------------------------------------------------------------------------------------------------------------------------------------|------------------------------------|------|----------------------------------------------------------------------------------------------------|------------------------------------|
| i   | 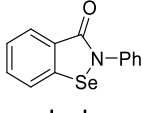<br><b>ebselen</b>                                                            | 0.10 ± 0.01                        | vi   | <br><b>13</b>    | >100                               |
| ii  | <br><b>nirmatrelvir (1)</b>                                                  | >100                               | vii  | <br><b>14</b>   | >100                               |
| iii | <br><b>15</b>                                                               | >100                               | viii | <br><b>27a</b> | >100                               |
| iv  | <br>Ar = <i>p</i> -OCF <sub>3</sub> C <sub>6</sub> H <sub>4</sub> <b>20</b> | >100                               | ix   | <br><b>27b</b> | >100                               |
| v   | <br>Ar = <i>p</i> -CF <sub>3</sub> C <sub>6</sub> H <sub>4</sub> <b>21</b>  | >100                               | x    | <br><b>28</b>  | >100                               |

|     | SARS-CoV-2 M <sup>pro</sup> inhibitor                                                                                                                        | <sup>a)</sup> IC <sub>50</sub> [μM] |      | SARS-CoV-2 M <sup>pro</sup> inhibitor                                                                  | <sup>a)</sup> IC <sub>50</sub> [μM] |
|-----|--------------------------------------------------------------------------------------------------------------------------------------------------------------|-------------------------------------|------|--------------------------------------------------------------------------------------------------------|-------------------------------------|
| xi  | 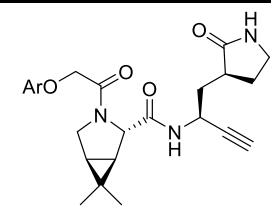<br>Ar = <i>p</i> -OCF <sub>3</sub> C <sub>6</sub> H <sub>4</sub> <b>18</b> | >100                                | xiii | <br><b>GC376 (3)</b> | >100                                |
| xii | <br>Ar = <i>p</i> -CF <sub>3</sub> C <sub>6</sub> H <sub>4</sub> <b>19</b>  | >100                                | xiv  | <br><b>23</b>        | >100                                |

a) SARS-CoV-2 PL<sup>pro</sup> inhibition assays were performed using SPE-MS as reported<sup>3</sup>. Data are presented as a mean of independent duplicates, each composed of technical duplicates (n = 2; mean ± SD).

**Supporting Table S4. Data collection and refinement statistics for the SARS-CoV-2 M<sup>pro</sup>:13 complex.**

| SARS-CoV-2 M <sup>pro</sup> :13 complex             |                                          |
|-----------------------------------------------------|------------------------------------------|
| <b>PDB ID</b>                                       | 8B2T                                     |
| <b>Data collection</b>                              |                                          |
| Space group                                         | <i>P</i> 2 <sub>1</sub> 2 <sub>1</sub> 2 |
| Symmetry                                            | orthorhombic                             |
| Cell dimensions                                     |                                          |
| <i>a</i> , <i>b</i> , <i>c</i> (Å)                  | 46.20, 64.65, 101.81                     |
| $\alpha$ , $\beta$ , $\gamma$ (°)                   | 90.0, 90.0, 90.0                         |
| Resolution (Å)                                      | 11.53-1.89 (1.94-1.89)                   |
| <i>R</i> <sub>merge</sub>                           | 0.543 (7.22)                             |
| <i>I</i> / $\sigma$ <i>I</i>                        | 7.6 (1.5)                                |
| CC (1/2)                                            | 0.98 (0.48)                              |
| Completeness (%)                                    | 79.1 (51.8)                              |
| Redundancy                                          | 16.4 (22.4)                              |
| <b>Refinement</b>                                   |                                          |
| Resolution (Å)                                      | 22.54-1.90                               |
| No. reflections                                     | 23137                                    |
| <i>R</i> <sub>work</sub> / <i>R</i> <sub>free</sub> | 0.182 / 0.2223                           |
| No. atoms                                           |                                          |
| Protein                                             | 2370                                     |
| Ligand/ion                                          | 35                                       |
| Water                                               | 83                                       |
| <i>B</i> -factors                                   |                                          |
| Protein                                             | 32.9                                     |
| Ligand/ion                                          | 26.9                                     |
| Water                                               | 33.3                                     |
| R.m.s. deviations                                   |                                          |
| Bond lengths (Å)                                    | 0.006                                    |
| Bond angles (°)                                     | 1.42                                     |

\*Values in parentheses are for highest-resolution shell.

### 3. General synthesis information

All reagents were from commercial sources (Sigma-Aldrich, Inc.; Fluorochem Ltd; Ambeed, Inc.) and used as received. Anhydrous solvents (Sigma-Aldrich, Inc.) were kept under an atmosphere of nitrogen. Nirmatrelvir (**1**) was synthesized according to Pfizer's published synthesis<sup>8</sup> and, in addition, commercially-sourced (AstaTech, Inc.).

(1*R*,2*S*,5*S*)-3-((*S*)-3,3-Dimethyl-2-(2,2,2-trifluoroacetamido)butanoyl)-6,6-dimethyl-3-azabicyclo[3.1.0]hexane-2-carboxylic acid (**12**) was synthesized from commercially-sourced materials as reported,<sup>8</sup> with the exception that COMU<sup>9</sup> was used instead of HATU as amide coupling reagent. Note that final compounds were purified by reverse phase high performance liquid chromatography (HPLC) rather than crystallization/titration due to the smaller synthesis scale compared to Pfizer's synthesis.<sup>8</sup>

Purifications were performed using a Biotage Isolera One or a Biotage Selekt purification machine (wavelength monitored: 254 and 280 nm) equipped with pre-packed Biotage<sup>®</sup> SFär flash chromatography cartridges. The cartridge type and size as well as solvent gradients (in column volumes, CV) used, are specified in the individual experimental procedures. HPLC grade solvents (Sigma-Aldrich Inc.) were used for purifications, reaction work-ups, and extractions. Reversed-phase HPLC purifications were performed using a semi-preparative HPLC machine (Shimadzu UK Ltd.) equipped with a reverse phase column (ACE 10 AQ, dimensions: 250 mm length, 21.2 mm inner diameter, 10.0  $\mu$ m particle size). A linear gradient of acetonitrile in water (each containing 0.1%<sub>v/v</sub> formic acid) was used as eluent (flow rate: 20 mL/min; wavelength monitored: 220 nm). Fractions were lyophilized and analyzed using <sup>1</sup>H NMR.

Thin layer chromatography (TLC) was carried out using Merck silica gel 60 F<sub>254</sub> TLC plates and visualized using UV light or ninhydrin stain. Infrared (IR) spectroscopy was performed using a Bruker Tensor-27 Fourier transform infrared (FT-IR) spectrometer. High-resolution mass spectrometry (HRMS) was performed using electrospray ionization (ESI) mass spectrometry (MS) in the positive or negative ionization mode employing a Thermo Scientific Exactive mass spectrometer (ThermoFisher Scientific); data are presented as a mass-to-charge ratio (*m/z*).

Nuclear magnetic resonance (NMR) spectroscopy was performed using a Bruker AVANCE AVIIIHD 600 machine equipped with a 5 mm BB-F/1H Prodigy N<sub>2</sub> cryoprobe or a Bruker AVIIIHD 400 nanobay machine. Chemical shifts for protons are reported in parts per million (ppm) downfield from tetramethylsilane and are referenced to residual protium in the NMR solvent (*i.e.* DMSO-*d*<sub>6</sub>:  $\delta$  = 2.49 ppm; CD<sub>3</sub>OD:  $\delta$  = 3.31 ppm; D<sub>2</sub>O:  $\delta$  = 4.79 ppm; CDCl<sub>3</sub>:  $\delta$  = 7.28 ppm). For <sup>13</sup>C NMR, chemical shifts are reported in the scale relative to the NMR solvent (*i.e.* DMSO-*d*<sub>6</sub>:  $\delta$  = 39.52 ppm; CDCl<sub>3</sub>:  $\delta$  = 77.0 ppm). For <sup>19</sup>F NMR, chemical shifts are reported in the scale relative to CFCl<sub>3</sub>. NMR data are reported as follows: chemical shift, multiplicity (s: singlet, d: doublet, dd: doublet of doublets, t: triplet, q: quartet, m: multiplet, br: broad signal), coupling constant (*J*, Hz; accurate to 0.1 Hz), and integration. The number of C-atoms in brackets indicates overlapping signals in <sup>13</sup>C NMR; chemical shift numbers in brackets indicate close signals that can be differentiated by considering the second decimal numbers. All compounds are >95% pure by NMR and HPLC analysis unless stated otherwise, NMR spectra are shown in Section 7 of the Supporting Information.

In agreement with the reported NMR spectra of nirmatrelvir (**1**) and derivatives,<sup>8</sup> minor amounts of additional species were present in NMR spectra, which are likely rotamers as their ratio changes depending on the solvent used.

#### 4. General synthetic procedures

**General Procedure A.** To a solution of a methyl ester (1.0 equiv.) in anhydrous tetrahydrofuran (THF; 0.3 M) was added an aqueous LiOH solution (2 M; 3.0 equiv.) under an ambient atmosphere at 0 °C. The reaction mixture was stirred overnight whilst slowly warming to ambient temperature, before THF was evaporated. The pH of the aqueous phase was adjusted to pH 2 using aqueous HCl (1 M), followed by extraction with ethyl acetate (three times). The combined organic extracts were washed with brine, dried over anhydrous Na<sub>2</sub>SO<sub>4</sub>, filtered, and evaporated to afford the corresponding carboxylic acid, which was used in the next step without further purification.

**General Procedure B.** To a solution of a Boc-protected amino acid (1.0 equiv.) in anhydrous CH<sub>2</sub>Cl<sub>2</sub> (0.25 M) was added 1,1'-carbonyldiimidazole (1.2 equiv.) at ambient temperature under a nitrogen atmosphere. The reaction mixture was stirred until CO<sub>2</sub> evolution ceased (at least 30 min), before being cooled to 0 °C followed by the subsequent addition of *N,N*-diisopropylethylamine (1.5 equiv.) and *N,O*-dimethyl hydroxylamine hydrochloride (1.5 equiv.). The reaction mixture was stirred overnight (~14 h) under nitrogen atmosphere whilst slowly warming up to room temperature, before being diluted with deionized water at 0 °C. The mixture was extracted with CH<sub>2</sub>Cl<sub>2</sub> (three times); the combined organic extracts were washed with brine, dried over anhydrous Na<sub>2</sub>SO<sub>4</sub>, filtered, evaporated, and purified by column chromatography to afford the corresponding Weinreb amide.

**General Procedure C.** To a solution of the Ohira-Bestmann reagent **10**<sup>6-7</sup> (1.2 equiv.) in anhydrous methanol (0.6 M) was added K<sub>2</sub>CO<sub>3</sub> (2.0 equiv.) and the resultant suspension was stirred for 10 min under nitrogen atmosphere at ambient temperature. Then, a solution of an aldehyde (1.0 equiv.) in anhydrous methanol (1 M) was added to the suspension and the reaction mixture was stirred at room temperature overnight (~14 h), before being diluted with deionized water. The mixture was extracted with diethyl ether (three times); the combined organic extracts were washed with brine, dried over anhydrous Na<sub>2</sub>SO<sub>4</sub>, filtered, evaporated, and purified by column chromatography to afford the corresponding terminal alkyne.

**General Procedure D.** To a solution of a *N*-Boc-protected amine (1.0 equiv.) in anhydrous CH<sub>2</sub>Cl<sub>2</sub> (1 M) was added a HCl solution (4 N in 1,4 dioxane; 5.0 equiv.). The reaction mixture was stirred overnight (~14 h) at ambient temperature under an ambient atmosphere, before being evaporated to afford the corresponding amine hydrochloride salt, which was used in the next step without further purification.

**General Procedure E.** To a solution of an amine hydrochloride salt (1.0 equiv.) and a carboxylic acid (1.2 equiv.) in a 1:1 (v/v) mixture of anhydrous DMF (0.46 M) and anhydrous CH<sub>2</sub>Cl<sub>2</sub> (0.46 M) were sequentially added *N*-methyl morpholine (NMM; 3.0 equiv.) and (1-cyano-2-ethoxy-2-oxoethylideneaminoxy)dimethylamino-morpholino-carbenium hexafluorophosphate (COMU)<sup>9</sup> (1.2 equiv.) at 0 °C. The reaction mixture was stirred overnight (~14 h) under nitrogen atmosphere whilst slowly warming up to room temperature, before being diluted with aqueous HCl solution (1 M). The mixture was extracted with ethyl acetate (three times); the combined organic extracts were sequentially washed with a saturated aqueous NaHCO<sub>3</sub> solution and brine, dried over anhydrous Na<sub>2</sub>SO<sub>4</sub>, filtered, evaporated, and purified using HPLC. Fractions containing the corresponding pure amide coupling product were lyophilized.

**General Procedure F.** To a solution of an amide (1.0 equiv.) in anhydrous CH<sub>2</sub>Cl<sub>2</sub> (0.22 M) was added the Burgess reagent (**42**)<sup>10-11</sup> (2.48 equiv.). The reaction mixture was stirred at ambient temperature under nitrogen atmosphere for 1 h, before being diluted with a 2:1 (v/v) mixture of a saturated aqueous NaHCO<sub>3</sub> solution and brine. The organic layer was separated, dried over anhydrous Na<sub>2</sub>SO<sub>4</sub>, filtered, evaporated, and purified using HPLC.



Fractions containing the corresponding pure nitrile coupling product were lyophilized.

**General Procedure G.** A solution of alkyne **24** (1.0 equiv.) and an aryl iodide (1.3 equiv.) in a 1:1 (v/v) mixture of anhydrous THF and triethylamine (0.2 M) was degassed with nitrogen for 5 min in a reaction tube. Bis(triphenylphosphine)palladium(II) dichloride (2.5 mol%) and CuI (5 mol%) were added to the mixture and the resultant suspension was degassed for another 5 min with nitrogen. The reaction tube was then sealed and the mixture was stirred at 80 °C for 3 h, before being cooled to room temperature. The mixture was diluted with ethyl acetate and sequentially washed with a saturated aqueous NH<sub>4</sub>Cl solution, water, and brine; the organic layer was dried over anhydrous Na<sub>2</sub>SO<sub>4</sub>, filtered, evaporated, and purified by column chromatography to afford the corresponding aryl substituted alkyne.

## 5. Experimental procedures and compound characterizations

**(S)-2-((tert-Butoxycarbonyl)amino)-3-((S)-2-oxopyrrolidin-3-yl)propanoic acid (46).** According to General

Procedure A, carboxylic acid **46** (2.78 g, 83%) was obtained from commercially-sourced methyl (S)-2-((tert-butoxycarbonyl)amino)-3-((S)-2-oxopyrrolidin-3-yl)propanoate (**8**; 3.5 g, 12.2 mmol). **46** was used in the next step without further purification. White amorphous solid; <sup>1</sup>H NMR (600 MHz, 300 K, DMSO-*d*<sub>6</sub>): δ = 12.50 (s, 1H), 7.61 (s, 1H), 7.22 (d, *J* = 8.2 Hz, 1H), 3.93–3.89 (m, 1H), 3.16–3.10 (m, 2H), 2.27–2.21 (m, 1H), 2.16–2.11 (m, 1H), 1.98–1.93 (m, 1H), 1.65–1.58 (m, 1H), 1.57–1.50 (m, 1H), 1.37 ppm (s, 9H); <sup>13</sup>C NMR (150 MHz, 300 K, DMSO-*d*<sub>6</sub>): δ = 178.2, 174.0, 155.6, 78.0, 51.8, 37.8, 32.4, 30.7, 28.2, 27.3 ppm; IR (film):  $\tilde{\nu}$  = 3319, 2977, 1688, 1524, 1444, 1393, 1367, 1249, 1164, 1051 cm<sup>-1</sup>; HRMS (ESI): *m/z* calculated for C<sub>12</sub>H<sub>21</sub>O<sub>5</sub>N<sub>2</sub> [M+H]<sup>+</sup>: 273.1445, found: 273.1442.

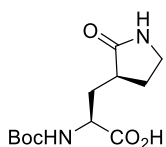

**tert-Butyl ((S)-1-(methoxy(methyl)amino)-1-oxo-3-((S)-2-oxopyrrolidin-3-yl)propan-2-yl)carbamate (47).**

According to General Procedure B, amide **47** (1857 mg, 58%) was obtained from carboxylic acid **46** (2750 mg, 10.1 mmol), following column chromatography (50 g Sfär cartridge; 120 mL/min; initially, 100%<sub>v/v</sub> cyclohexane (2 CV), followed by a linear gradient (15 CV): 0%<sub>v/v</sub> → 100%<sub>v/v</sub> acetone in cyclohexane). White amorphous solid; <sup>1</sup>H NMR (600 MHz, 300 K, DMSO-*d*<sub>6</sub>): δ = 7.60 (s, 1H), 7.16 (brd, *J* = 8.3 Hz, 1H), 4.42–4.40 (m, 1H), 3.71 (s, 3H), 3.14–3.12 (m, 2H), 3.09 (s, 3H), 2.27–2.25 (m, 1H), 2.17–2.13 (m, 1H), 1.91–1.87 (m, 1H), 1.64–1.59 (m, 1H), 1.40–1.38 (m, 1H), 1.36 ppm (s, 9H); <sup>13</sup>C NMR (150 MHz, 300 K, DMSO-*d*<sub>6</sub>): δ = 178.1, 172.7 (br), 155.6, 78.0, 61.1, 49.1, 37.7, 32.3, 32.0, 28.2, 28.1, 27.2 ppm; IR (film):  $\tilde{\nu}$  = 3304, 2980, 1689, 1524, 1442, 1392, 1367, 1253, 1168, 1049, 1018 cm<sup>-1</sup>; HRMS (ESI): *m/z* calculated for C<sub>14</sub>H<sub>26</sub>O<sub>5</sub>N<sub>3</sub> [M+H]<sup>+</sup>: 316.1867, found: 316.1861.

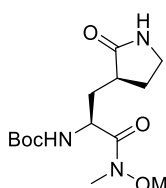

**tert-Butyl ((S)-1-((S)-2-oxopyrrolidin-3-yl)but-3-yn-2-yl)carbamate (24).** To a solution of amide **47** (500 mg,

1.59 mmol, 1.0 equiv.) in anhydrous tetrahydrofuran (0.25 M) was added a LiAlH<sub>4</sub> solution (4.0 M in diethyl ether; 1.67 mmol, 417 μL, 1.2 equiv.) dropwise at -78 °C under nitrogen atmosphere. The resultant mixture was stirred for 1 h at -78 °C under nitrogen atmosphere. Then, the reaction was quenched at -78 °C by addition of a saturated aqueous NH<sub>4</sub>Cl solution and warmed to 0 °C. The mixture was extracted with ethyl acetate (three times) and the combined organic extracts were dried over anhydrous Na<sub>2</sub>SO<sub>4</sub>, filtered, and evaporated to afford the crude aldehyde **9** (380 mg, 93%), which was used in the next step without further purification. Characteristic analytical data of aldehyde (**9**): <sup>1</sup>H NMR (400 MHz, 300 K, CDCl<sub>3</sub>): δ = 9.58 (s, 1H), 6.18–6.14 (m, 2H), 4.23–4.20 (m, 1H), 3.39–3.35 (m, 3H), 2.53–2.42 (m, 2H), 2.02–1.94 (m, 1H), 1.89–1.82 (m, 1H), 1.47 ppm (s, 9H); <sup>13</sup>C NMR (100 MHz, 300 K, CDCl<sub>3</sub>): δ = 200.3, 179.8, 156.1, 80.0, 58.7, 40.4, 37.8, 30.4, 28.6, 28.3 ppm; HRMS (ESI): *m/z* calculated for C<sub>12</sub>H<sub>21</sub>O<sub>4</sub>N<sub>2</sub> [M+H]<sup>+</sup>: 257.1496, found: 257.1495.

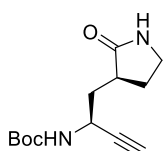

According to General Procedure C, alkyne **24** (124 mg, 43%) was obtained from aldehyde **9** (293 mg, 1.14 mmol), following column chromatography (10 g Sfär cartridge; 40 mL/min; initially, 100%<sub>v/v</sub> cyclohexane (2 CV), followed by a linear gradient (15 CV): 0%<sub>v/v</sub> → 60%<sub>v/v</sub> acetone in cyclohexane). <sup>1</sup>H NMR analysis indicated the that low levels of epimerization occurred α to the aldehyde; the diastereomer was not separated. Clear colorless oil; <sup>1</sup>H NMR (600 MHz, 300 K, DMSO-*d*<sub>6</sub>): δ = 7.58 (s, 1H), 7.32 (brd, *J* = 8.6 Hz, 1H), 4.38 (dd, *J* = 14.9, 7.1 Hz, 1H), 3.16–3.09 (m, 3H), 2.24–2.15 (m, 2H), 1.96–1.92 (m, 1H), 1.67–1.61 (m, 1H), 1.51–1.47 (m, 1H), 1.37 ppm (s, 9H); <sup>13</sup>C NMR (150 MHz, 300 K, DMSO-*d*<sub>6</sub>): δ = 178.1, 154.9, 84.7, 78.1, 72.9, 40.4, 39.2 (assigned using HSQC), 37.6, 36.8, 28.2, 27.7 ppm; IR (film):  $\tilde{\nu}$  = 3287, 2980, 2110, 1690, 1522, 1459, 1367, 1252, 1167, 1031 cm<sup>-1</sup>; HRMS (ESI): *m/z* calculated for C<sub>13</sub>H<sub>21</sub>O<sub>3</sub>N<sub>2</sub> [M+H]<sup>+</sup>: 253.1547, found: 253.1544.

**(S)-3-((S)-2-Aminobut-3-yn-1-yl)pyrrolidin-2-one hydrochloride (11).** According to General Procedure D, alkyne **11** (93 mg, app. quant.) was obtained from alkyne **24** (123 mg, 0.49 mmol) as a hydrochloride salt, which

was used in the next step without further purification. Pale brown solid;  $^1\text{H NMR}$  (600 MHz, 300 K,  $\text{D}_2\text{O}$ ):  $\delta = 4.43\text{--}4.40$  (m, 1H), 3.44–3.37 (m, 2H), 3.06 (dd,  $J = 2.3, 0.9$  Hz, 1H), 2.83–2.78 (m, 1H), 2.49–2.44 (m, 1H), 2.25–2.21 (m, 1H), 2.04 (ddd,  $J = 14.3, 8.0, 6.4$  Hz, 1H), 1.98–1.93 ppm (m, 1H);  $^{13}\text{C NMR}$  (150 MHz, 300 K,  $\text{D}_2\text{O}$ ):  $\delta = 181.3, 77.5, 77.2, 41.7, 40.8, 38.9, 34.2, 27.3$  ppm; IR (film):  $\tilde{\nu} = 3659, 3217, 2981, 2887, 2119, 1666, 1613, 1494, 1459, 1384, 1302, 1276, 1262, 1167, 1087, 1053$   $\text{cm}^{-1}$ ; HRMS (ESI):  $m/z$  calculated for  $\text{C}_8\text{H}_{13}\text{ON}_2$   $[\text{M}-\text{Cl}]^+$ : 153.1022, found: 153.1020.

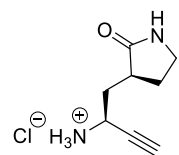

**(1R,2S,5S)-3-((S)-3,3-Dimethyl-2-(2,2,2-trifluoroacetamido)butanoyl)-6,6-dimethyl-N-((S)-1-((S)-2-oxopyrrolidin-3-yl)but-3-yn-2-yl)-3-azabicyclo[3.1.0]hexane-2-carboxamide (13).** According to General

Procedure E, nirmatrelvir alkyne derivative **13** (69 mg, 17%) was obtained from alkyne **11** (150 mg, 0.80 mmol) and carboxylic acid **12**<sup>8</sup> (348 mg, 0.95 mmol), following HPLC purification (ACE 10 AQ 250  $\times$  21.2 mm column; 20 mL/min; using a linear gradient of 2%<sub>v/v</sub>  $\rightarrow$  67%<sub>v/v</sub> acetonitrile (+0.1%<sub>v/v</sub> formic acid) in water (+0.1%<sub>v/v</sub> formic acid) over 30 min;  $t_R = 24.5$  min). White amorphous solid;  $^1\text{H NMR}$  (600 MHz, 300 K,  $\text{DMSO}-d_6$ ):  $\delta = 9.38$  (d,  $J = 8.4$  Hz, 1H), 8.56 (d,  $J = 9.0$  Hz, 1H), 7.53 (s, 1H), 4.68–4.64 (m, 1H), 4.40 (d,  $J = 8.3$  Hz, 1H), 4.17 (s, 1H), 3.89 (dd,  $J = 10.3, 5.5$  Hz, 1H), 3.67 (d,  $J = 10.4$  Hz, 1H), 3.20 (d,  $J = 2.3$  Hz, 1H), 3.11–3.08 (m, 1H), 3.01–2.97 (m, 1H), 2.40–2.34 (m, 1H), 2.14–2.10 (m, 1H), 2.06–2.02 (m, 1H), 1.64–1.57 (m, 1H), 1.52 (dd,  $J = 7.5, 5.6$  Hz, 1H), 1.49–1.44 (m, 1H), 1.24 (d,  $J = 7.7$  Hz, 1H), 1.01 (s, 3H), 0.97 (s, 9H), 0.83 ppm (s, 3H);  $^{13}\text{C NMR}$  (150 MHz, 300 K,  $\text{DMSO}-d_6$ ):  $\delta = 178.2, 170.0, 167.3, 156.9$  (q,  $J = 37.1$  Hz), 115.8 (q,  $J = 287.2$  Hz), 84.2, 72.9, 60.1, 58.2, 47.7, 39.4 (assigned using HSQC), 37.8, 37.5, 37.0, 34.6, 30.5, 27.4, 27.2, 26.3, 25.8, 18.7, 12.4 ppm;  $^{19}\text{F NMR}$  (565 MHz, 300 K,  $\text{DMSO}-d_6$ ):  $\delta = -72.9$  ppm (s, 3F); IR (film):  $\tilde{\nu} = 3274, 3056, 2930, 2874, 1670, 1541, 1507, 1457, 1438, 1353, 1265, 1230, 1197, 1162, 1112, 1084, 1060, 1012$   $\text{cm}^{-1}$ ; HRMS (ESI):  $m/z$  calculated for  $\text{C}_{24}\text{H}_{34}\text{O}_4\text{N}_4\text{F}_3$   $[\text{M}+\text{H}]^+$ : 499.2527, found: 499.2511.

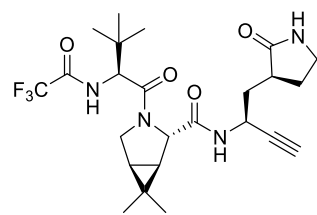

**tert-Butyl (S)-1-(methoxy(methyl)amino)-4-(methylthio)-1-oxobutan-2-yl)carbamate (48).** According to General Procedure B, amide **48** (594 mg, 99%) was obtained from commercially-sourced *N*-(tert-

butoxycarbonyl)-*L*-methionine (**38**) (500 mg, 2.01 mmol), following column chromatography (25 g Sfär cartridge; 80 mL/min; initially, 100%<sub>v/v</sub> cyclohexane (2 CV), followed by a linear gradient (15 CV): 0%<sub>v/v</sub>  $\rightarrow$  40%<sub>v/v</sub> acetone in cyclohexane). Clear colorless oil;  $^1\text{H NMR}$  (400 MHz, 300 K,  $\text{CDCl}_3$ ):  $\delta = 5.24$  (brd,  $J = 8.0$  Hz, 1H), 4.80 (brs, 1H), 3.79 (s, 3H), 3.22 (s, 3H), 2.59–2.53 (m, 2H), 2.11–2.10 (m, 3H), 2.05–1.98 (m, 1H), 1.85–1.78 (m, 1H), 1.44 ppm (s, 9H);  $^{13}\text{C NMR}$  (100 MHz, 300 K,  $\text{CDCl}_3$ ):  $\delta = 172.5, 155.5, 79.6, 61.6, 49.8, 32.4, 32.1, 30.1, 28.3, 15.4$  ppm; IR (film):  $\tilde{\nu} = 3660, 3321, 2980, 1711, 1664, 1512, 1442, 1391, 1367, 1250, 1169, 1047, 1025$   $\text{cm}^{-1}$ ; HRMS (ESI):  $m/z$  calculated for  $\text{C}_{12}\text{H}_{25}\text{O}_4\text{N}_2\text{S}$   $[\text{M}+\text{H}]^+$ : 293.1530, found: 293.1524.

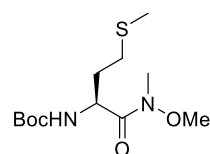

**tert-Butyl (S)-5-(methylthio)pent-1-yn-3-yl)carbamate (49).** To a solution of amide **48** (300 mg, 1.03 mmol, 1.0 equiv.) in anhydrous tetrahydrofuran (0.25 M) was added a  $\text{LiAlH}_4$  solution (4.0 M in diethyl ether; 1.28 mmol,

321  $\mu\text{L}$ , 1.25 equiv.) dropwise at 0  $^\circ\text{C}$  under nitrogen atmosphere. The resultant mixture was stirred for 1 h at 0  $^\circ\text{C}$  under nitrogen atmosphere. Then, the reaction was quenched at 0  $^\circ\text{C}$  by addition of a 5%<sub>m/v</sub> aqueous  $\text{NaHSO}_4$  solution; the mixture was diluted with ethyl acetate, and sequentially washed with 55%<sub>m/v</sub> aqueous  $\text{NaHSO}_4$  solution (twice), 5%<sub>m/v</sub> aqueous  $\text{NaHCO}_3$  solution (twice), and brine. The organic phase was dried over anhydrous  $\text{Na}_2\text{SO}_4$ , filtered, and evaporated to afford

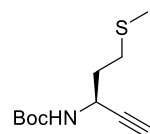

the crude aldehyde **39** (226 mg, 94%), which was used in the next step without further purification. Characteristic analytical data of aldehyde (**39**):  $^1\text{H NMR}$  (600 MHz, 300 K,  $\text{CDCl}_3$ ):  $\delta$  = 9.66 (s, 1H), 5.22 (brs, 1H), 4.35–4.32 (m, 1H), 2.62–2.54 (m, 2H), 2.27–2.24 (m, 1H), 2.10 (s, 3H), 1.98–1.93 (m, 1H), 1.47 ppm (s, 9H);  $^{13}\text{C NMR}$  (150 MHz, 300 K,  $\text{CDCl}_3$ ):  $\delta$  = 199.0, 155.5, 80.3, 59.0, 29.8, 28.7, 28.2, 15.4 ppm; HRMS (ESI):  $m/z$  calculated for  $\text{C}_{10}\text{H}_{20}\text{O}_3\text{NS}$   $[\text{M}+\text{H}]^+$ : 234.1158, found: 234.1154.

According to General Procedure C, alkyne **49** (105 mg, 47%) was obtained from aldehyde **39** (224 mg, 0.96 mmol), following column chromatography (10 g Sfar cartridge; 40 mL/min; initially, 100% $_{\text{v/v}}$  cyclohexane (2 CV), followed by a linear gradient (15 CV): 0% $_{\text{v/v}}$   $\rightarrow$  20% $_{\text{v/v}}$  acetone in cyclohexane). Clear colorless oil;  $^1\text{H NMR}$  (400 MHz, 300 K,  $\text{CDCl}_3$ ):  $\delta$  = 4.82 (brs, 1H), 4.58 (brd,  $J$  = 4.8 Hz, 1H), 2.69–2.58 (m, 2H), 2.32 (d,  $J$  = 2.3 Hz, 1H), 2.13 (s, 3H), 2.03–1.90 (m, 2H), 1.47 ppm (s, 9H);  $^{13}\text{C NMR}$  (100 MHz, 300 K,  $\text{CDCl}_3$ ):  $\delta$  = 154.7, 83.8, 82.7, 71.7, 42.1, 35.3, 30.0, 28.3, 15.5 ppm; IR (film):  $\tilde{\nu}$  = 3659, 3240, 2981, 2890, 1687, 1490, 1460, 1444, 1379, 1308, 1282, 1250, 1166, 1071, 1028  $\text{cm}^{-1}$ ; HRMS (ESI):  $m/z$  calculated for  $\text{C}_{11}\text{H}_{20}\text{O}_2\text{NS}$   $[\text{M}+\text{H}]^+$ : 230.1209, found: 230.1207.

**(S)-5-(Methylthio)pent-1-yn-3-amine hydrochloride (40)**. According to General Procedure D, alkyne **40** (64 mg, app. quant.) was obtained from alkyne **49** (88 mg, 0.38 mmol) as a hydrochloride salt, which was used in the

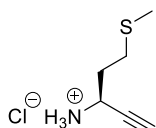

next step without further purification. Brown solid;  $^1\text{H NMR}$  (600 MHz, 300 K,  $\text{DMSO}-d_6$ ):  $\delta$  = 8.56 (brs, 3H), 4.15 (brs, 1H), 3.76 (d,  $J$  = 2.2 Hz, 1H), 2.64 (ddd,  $J$  = 13.5, 8.5, 5.0 Hz, 1H), 2.57–2.52 (m, 1H), 2.07–1.99 (m, 1H), 2.06 (s, 3H), 1.96–1.87 ppm (m, 1H);  $^{13}\text{C NMR}$  (150 MHz, 300 K,  $\text{DMSO}-d_6$ ):  $\delta$  = 79.0, 78.7, 40.9, 32.1, 28.7, 14.4 ppm; IR (film):  $\tilde{\nu}$  = 3659, 3401, 3268, 2981, 2888, 2125, 1515, 1407, 1372, 1159  $\text{cm}^{-1}$ ; HRMS (ESI):  $m/z$  calculated for  $\text{C}_6\text{H}_{12}\text{NS}$   $[\text{M}-\text{Cl}]^+$ : 130.0685, found: 130.0683.

**(1R,2S,5S)-3-((S)-3,3-Dimethyl-2-(2,2,2-trifluoroacetamido)butanoyl)-6,6-dimethyl-N-((S)-5-(methylthio)pent-1-yn-3-yl)-3-azabicyclo[3.1.0]hexane-2-carboxamide (14)**. According to General Procedure

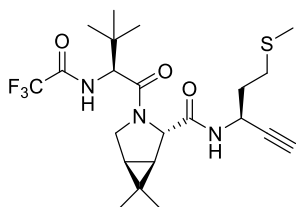

E, nirmatrelvir alkyne derivative **14** (19 mg, 17%) was obtained from alkyne **40** (40 mg, 0.24 mmol) and carboxylic acid **12**<sup>8</sup> (120 mg, 0.29 mmol), following HPLC purification (ACE 10 AQ 250  $\times$  21.2 mm column; 20 mL/min; using a linear gradient of 2% $_{\text{v/v}}$   $\rightarrow$  64% $_{\text{v/v}}$  acetonitrile (+0.1% $_{\text{v/v}}$  formic acid) in water (+0.1% $_{\text{v/v}}$  formic acid) over 55 min;  $t_R$  = 47.7 min).  $^1\text{H}$  and  $^{13}\text{C NMR}$  analysis indicated the presence of two rotamers, their relative ratio depends on the solvent used for NMR analysis; NMR data are given for the major rotamer. The occurrence of rotamers during NMR analysis of nirmatrelvir and derivatives has been reported<sup>8</sup>. White amorphous solid;  $^1\text{H NMR}$  (600 MHz, 300 K,  $\text{DMSO}-d_6$ ):  $\delta$  = 9.32 (d,  $J$  = 9.4 Hz, 1H), 8.52 (d,  $J$  = 8.5 Hz, 1H), 4.68–4.64 (m, 1H), 4.37 (d,  $J$  = 7.9 Hz, 1H), 4.18 (s, 1H), 3.87 (dd,  $J$  = 10.3, 5.5 Hz, 1H), 3.68 (d,  $J$  = 10.4 Hz, 1H), 3.22 (d,  $J$  = 2.3 Hz, 1H), 2.55–2.51 (m, 1H), 2.47–2.43 (m, 1H), 2.01 (s, 3H), 1.86–1.76 (m, 2H), 1.52 (dd,  $J$  = 7.5, 5.6 Hz, 1H), 1.24 (d,  $J$  = 7.6 Hz, 1H), 1.01 (s, 3H), 0.97 (s, 9H), 0.83 ppm (s, 3H);  $^{13}\text{C NMR}$  (150 MHz, 300 K,  $\text{DMSO}-d_6$ ):  $\delta$  = 170.0, 167.2, 156.9 (q,  $J$  = 36.7 Hz), 115.8 (q,  $J$  = 287.6 Hz), 83.5, 73.3, 60.0, 58.3, 47.6, 39.4 (assigned using HSQC), 35.1, 34.6, 30.5, 29.1, 27.2, 26.3, 25.8, 18.7, 14.6, 12.4 ppm;  $^{19}\text{F NMR}$  (565 MHz, 300 K,  $\text{DMSO}-d_6$ ):  $\delta$  = -72.9 ppm (s, 3F); IR (film):  $\tilde{\nu}$  = 3658, 3304, 2980, 2886, 1721, 1679, 1632, 1531, 1441, 1373, 1357, 1301, 1213, 1175, 1086  $\text{cm}^{-1}$ ; HRMS (ESI):  $m/z$  calculated for  $\text{C}_{22}\text{H}_{33}\text{O}_3\text{N}_3\text{F}_3\text{S}$   $[\text{M}+\text{H}]^+$ : 476.2189, found: 476.2177.

**(1R,2S,5S)-N-((S)-1-Amino-4-(methylthio)-1-oxobutan-2-yl)-3-((S)-3,3-dimethyl-2-(2,2,2-trifluoroacetamido)butanoyl)-6,6-dimethyl-3-azabicyclo[3.1.0]hexane-2-carboxamide (50).** According to

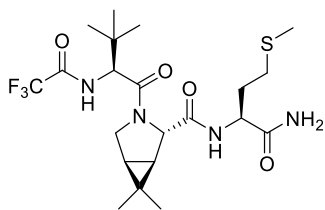

General Procedure E, amide **50** (43 mg, 36%) was obtained from commercially-sourced *L*-methionine amide (**41**; 131 mg, 0.88 mmol) and carboxylic acid **12**<sup>8</sup> (387 mg, 1.06 mmol), following HPLC purification (ACE 10 AQ 250 × 21.2 mm column; 20 mL/min; using a linear gradient of 2%<sub>v/v</sub> → 98%<sub>v/v</sub> acetonitrile (+0.1%<sub>v/v</sub> formic acid) in water (+0.1%<sub>v/v</sub> formic acid) over 32 min; *t*<sub>R</sub> = 19.4 min). <sup>1</sup>H and <sup>13</sup>C NMR analysis indicated the presence of two rotamers, their

relative ratio depends on the solvent used for NMR analysis; NMR data are given for the major rotamer. The occurrence of rotamers during NMR analysis of nirmatrelvir and derivatives has been reported<sup>8</sup>. White amorphous solid; <sup>1</sup>H NMR (600 MHz, 300 K, DMSO-*d*<sub>6</sub>): δ = 9.33 (d, *J* = 8.0 Hz, 1H), 8.18 (d, *J* = 8.2 Hz, 1H), 7.30 (s, 1H), 7.02 (s, 1H), 4.38 (d, *J* = 8.0 Hz, 1H), 4.29–4.25 (m, 1H), 4.28 (s, 1H), 3.85 (dd, *J* = 10.3, 5.4 Hz, 1H), 3.68 (d, *J* = 10.4 Hz, 1H), 2.54–2.50 (m, 1H), 2.41–2.36 (m, 1H), 2.01 (s, 3H), 1.95–1.89 (m, 1H), 1.76–1.70 (m, 1H), 1.47 (dd, *J* = 7.5, 5.5 Hz, 1H), 1.40 (d, *J* = 7.7 Hz, 1H), 1.00 (s, 3H), 0.97 (s, 9H), 0.83 ppm (s, 3H); <sup>13</sup>C NMR (150 MHz, 300 K, DMSO-*d*<sub>6</sub>): δ = 173.1, 170.7, 167.2, 156.8 (q, *J* = 37.0 Hz), 115.8 (q, *J* = 287.7 Hz), 60.1, 58.3, 51.7, 47.7, 34.6, 32.1, 30.5, 29.6, 27.0, 26.3, 25.9, 18.6, 14.7, 12.4 ppm; HRMS (ESI): *m/z* calculated for C<sub>21</sub>H<sub>34</sub>O<sub>4</sub>N<sub>4</sub>F<sub>3</sub>S [M+H]<sup>+</sup>: 495.2245, found: 495.2247.

**(1R,2S,5S)-N-((S)-1-Cyano-3-(methylthio)propyl)-3-((S)-3,3-dimethyl-2-(2,2,2-trifluoroacetamido)butanoyl)-6,6-dimethyl-3-azabicyclo[3.1.0]hexane-2-carboxamide (15).** According to

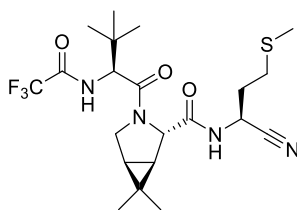

General Procedure F, nitrile **15** (41 mg, 13%) was obtained from amide **50** (336 mg, 0.68 mmol), following HPLC purification (ACE 10 AQ 250 × 21.2 mm column; 20 mL/min; using a linear gradient of 2%<sub>v/v</sub> → 98%<sub>v/v</sub> acetonitrile (+0.1%<sub>v/v</sub> formic acid) in water (+0.1%<sub>v/v</sub> formic acid) over 32 min; *t*<sub>R</sub> = 22.8 min). <sup>1</sup>H and <sup>13</sup>C NMR analysis indicated the presence of two rotamers, their relative ratio depends on the solvent used for NMR analysis; NMR data are given for the

major rotamer. The occurrence of rotamers during NMR analysis of nirmatrelvir and derivatives has been reported<sup>8</sup>. White amorphous solid; <sup>1</sup>H NMR (600 MHz, 300 K, DMSO-*d*<sub>6</sub>): δ = 9.34 (d, *J* = 8.1 Hz, 1H), 8.93 (d, *J* = 8.0 Hz, 1H), 4.91 (td, *J* = 8.4, 5.7 Hz, 1H), 4.39 (d, *J* = 8.1 Hz, 1H), 4.17 (s, 1H), 3.88 (dd, *J* = 10.4, 5.5 Hz, 1H), 3.69 (d, *J* = 10.4 Hz, 1H), 2.58–2.54 (m, 1H), 2.47–2.45 (m, 1H), 2.05–2.02 (m, 1H), 2.03 (s, 3H), 2.00–1.94 (m, 1H), 1.56 (dd, *J* = 7.4, 5.6 Hz, 1H), 1.30 (d, *J* = 7.6 Hz, 1H), 1.02 (s, 3H), 0.97 (s, 9H), 0.84 ppm (s, 3H); <sup>13</sup>C NMR (150 MHz, 300 K, DMSO-*d*<sub>6</sub>): δ = 170.8, 167.4, 156.9 (q, *J* = 36.9 Hz), 119.2, 115.8 (q, *J* = 287.8 Hz), 60.0, 58.3, 47.6, 38.7, 34.6, 31.8, 30.3, 28.5, 27.3, 26.3, 25.8, 18.8, 14.5, 12.3 ppm; <sup>19</sup>F NMR (565 MHz, 300 K, DMSO-*d*<sub>6</sub>): δ = -72.9 ppm (s, 3F); HRMS (ESI): *m/z* calculated for C<sub>21</sub>H<sub>32</sub>O<sub>3</sub>N<sub>4</sub>F<sub>3</sub>S [M+H]<sup>+</sup>: 477.2142, found: 477.2139.

**(1R,2S,5S)-6,6-Dimethyl-N-((S)-1-((S)-2-oxopyrrolidin-3-yl)but-3-yn-2-yl)-3-(2-(4-(trifluoromethoxy)phenoxy)acetyl)-3-azabicyclo[3.1.0]hexane-2-carboxamide (18).** According to General

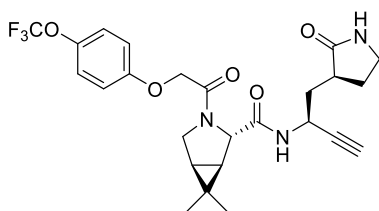

Procedure E, MI-09<sup>13</sup> alkyne derivative **18** (19 mg, 14%) was obtained from alkyne **11** (50 mg, 0.27 mmol) and carboxylic acid **16**<sup>13</sup> (119 mg, 0.32 mmol), following HPLC purification (ACE 10 AQ 250 × 21.2 mm column; 20 mL/min; using a linear gradient of 2%<sub>v/v</sub> → 65%<sub>v/v</sub> acetonitrile (+0.1%<sub>v/v</sub> formic acid) in water (+0.1%<sub>v/v</sub> formic acid) over 33 min; *t*<sub>R</sub> = 28.8 min). <sup>1</sup>H and <sup>13</sup>C NMR analysis indicated the presence of two

rotamers, their relative ratio depends on the solvent used for NMR analysis; NMR data are given for the major rotamer. The occurrence of rotamers during NMR analysis of nirmatrelvir and derivatives has been reported.<sup>8</sup> White amorphous solid; <sup>1</sup>H NMR (600 MHz, 300 K, DMSO-*d*<sub>6</sub>): δ = 8.46 (d, *J* = 8.7 Hz, 1H), 7.50 (s, 1H),

7.23–7.22 (m, 2H), 6.93–6.92 (m, 2H), 4.84 (d,  $J = 15.7$  Hz, 1H), 4.69 (d,  $J = 15.6$  Hz, 1H), 4.67–4.64 (m, 1H), 4.12 (s, 1H), 3.83 (dd,  $J = 10.4, 5.4$  Hz, 1H), 3.51 (d,  $J = 10.3$  Hz, 1H), 3.21 (d,  $J = 2.3$  Hz, 1H), 2.97–2.94 (m, 1H), 2.80–2.76 (m, 1H), 2.30–2.25 (m, 1H), 2.04–1.97 (m, 2H), 1.57–1.51 (m, 2H), 1.47 (ddd,  $J = 13.7, 10.5, 5.4$  Hz, 1H), 1.25 (d,  $J = 7.6$  Hz, 1H), 1.02 (s, 3H), 0.89 ppm (s, 3H);  $^{13}\text{C}$  NMR (150 MHz, 300 K, DMSO- $d_6$ ):  $\delta = 178.1, 169.9, 165.4, 156.9, 141.9, 122.2, 120.2$  (q,  $J = 255.0$  Hz), 115.8, 84.2, 73.0, 66.0, 60.2, 45.5, 39.4 (assigned using HSQC), 38.2, 37.3, 36.9, 30.5, 27.6, 27.1, 25.9, 18.7, 12.7 ppm;  $^{19}\text{F}$  NMR (565 MHz, 300 K, DMSO- $d_6$ ):  $\delta = -57.3$  ppm (s, 3F); IR (film):  $\tilde{\nu} = 3275, 2930, 1663, 1541, 1507, 1458, 1437, 1376, 1351, 1264, 1232, 1196, 1162, 1111, 1083, 1011$   $\text{cm}^{-1}$ ; HRMS (ESI):  $m/z$  calculated for  $\text{C}_{25}\text{H}_{29}\text{O}_5\text{N}_3\text{F}_3$   $[\text{M}+\text{H}]^+$ : 508.2054, found: 508.2040.

**(1R,2S,5S)-6,6-Dimethyl-N-((S)-1-((S)-2-oxopyrrolidin-3-yl)but-3-yn-2-yl)-3-(2-(4-(trifluoromethyl)phenoxy)acetyl)-3-azabicyclo[3.1.0]hexane-2-carboxamide (19).** According to General

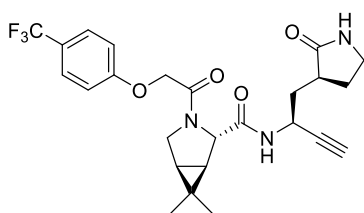

Procedure E, MI-09<sup>13</sup> alkyne derivative **19** (14 mg, 13%) was obtained from alkyne **11** (35 mg, 0.19 mmol) and carboxylic acid **17** (80 mg, 0.22 mmol), following HPLC purification (ACE 10 AQ 250  $\times$  21.2 mm column; 20 mL/min; using a linear gradient of 2%<sub>v/v</sub>  $\rightarrow$  65%<sub>v/v</sub> acetonitrile (+0.1%<sub>v/v</sub> formic acid) in water (+0.1%<sub>v/v</sub> formic acid) over 30 min;  $t_R = 16.3$  min).  $^1\text{H}$  and  $^{13}\text{C}$  NMR analysis indicated the presence of two rotamers, their relative

ratio depends on the solvent used for NMR analysis; NMR data are given for the major rotamer. The occurrence of rotamers during NMR analysis of nirmatrelvir and derivatives has been reported<sup>8</sup>. White amorphous solid;  $^1\text{H}$  NMR (600 MHz, 300 K,  $\text{CD}_3\text{OD}$ ):  $\delta = 7.57\text{--}7.55$  (m, 2H), 7.06–7.04 (m, 2H), 4.82 (d,  $J = 5.1$  Hz, 1H), 4.81–4.78 (m, 1H), 4.60 (s, 2H), 4.29 (s, 1H), 3.97 (d,  $J = 10.4, 5.5$  Hz, 1H), 3.62 (d,  $J = 10.4$  Hz, 1H), 3.51 (d,  $J = 10.3$  Hz, 1H), 3.11–3.06 (m, 1H), 2.92–2.86 (m, 1H), 2.73 (d,  $J = 2.3$  Hz, 1H), 2.58–2.50 (m, 1H), 2.24–2.10 (m, 2H), 1.69–1.62 (m, 3H), 1.42 (d,  $J = 7.6$  Hz, 1H), 1.11 (s, 3H), 1.00 ppm (s, 3H);  $^{13}\text{C}$  NMR (150 MHz, 300 K, DMSO- $d_6$ ):  $\delta = 178.1, 169.9, 165.2, 160.9, 126.6$  (q,  $J = 3.4$  Hz), 124.5 (q,  $J = 271.1$  Hz), 121.3 (q,  $J = 31.9$  Hz), 115.1, 84.2, 72.9, 65.6, 60.2, 45.5, 39.4 (assigned using HSQC), 38.1, 37.2, 36.9, 30.5, 27.5, 27.1, 25.9, 18.8, 12.7 ppm;  $^{19}\text{F}$  NMR (565 MHz, 300 K, DMSO- $d_6$ ):  $\delta = -59.8$  ppm (s, 3F); IR (film):  $\tilde{\nu} = 3275, 3055, 2944, 1663, 1616, 1593, 1541, 1520, 1457, 1435, 1329, 1314, 1258, 1237, 1184, 1162, 1113, 1064, 1042, 1011$   $\text{cm}^{-1}$ ; HRMS (ESI):  $m/z$  calculated for  $\text{C}_{25}\text{H}_{29}\text{O}_4\text{N}_3\text{F}_3$   $[\text{M}+\text{H}]^+$ : 492.2105, found: 492.2091.

**(1R,2S,5S)-N-((S)-1-Amino-1-oxo-3-((S)-2-oxopyrrolidin-3-yl)propan-2-yl)-6,6-dimethyl-3-(2-(4-(trifluoromethoxy)phenoxy)acetyl)-3-azabicyclo[3.1.0]hexane-2-carboxamide (51).** According to General

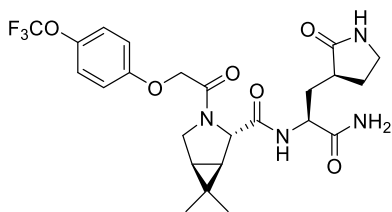

Procedure E, MI-09<sup>13</sup>-derived amide **51** (48 mg, 17%) was obtained from hydrochloride **43**<sup>8</sup> (133 mg, 0.64 mmol) and carboxylic acid **16**<sup>13</sup> (200 mg, 0.54 mmol) (Supporting Figure S4), following HPLC purification (ACE 10 AQ 250  $\times$  21.2 mm column; 20 mL/min; using a linear gradient of 2%<sub>v/v</sub>  $\rightarrow$  98%<sub>v/v</sub> acetonitrile (+0.1%<sub>v/v</sub> formic acid) in water (+0.1%<sub>v/v</sub> formic acid) over 32 min;  $t_R = 18.8$  min).  $^1\text{H}$  and  $^{13}\text{C}$  NMR analysis

indicated the presence of two rotamers, their relative ratio depends on the solvent used for NMR analysis; NMR data are given for the major rotamer. The occurrence of rotamers during NMR analysis of nirmatrelvir and derivatives has been reported<sup>8</sup>. White amorphous solid;  $^1\text{H}$  NMR (600 MHz, 300 K, DMSO- $d_6$ ):  $\delta = 8.27$  (d,  $J = 8.4$  Hz, 1H), 7.55 (s, 1H), 7.24–7.22 (m, 2H), 7.15 (s, 1H), 7.02 (s, 1H), 6.94–6.93 (m, 2H), 4.86 (d,  $J = 15.7$  Hz, 1H), 4.69 (d,  $J = 15.6$  Hz, 1H), 4.24–4.20 (m, 1H), 4.19 (s, 1H), 3.84 (dd,  $J = 10.4, 5.4$  Hz, 1H), 3.52 (d,  $J = 10.4$  Hz, 1H), 3.00–2.97 (m, 1H), 2.85–2.82 (m, 1H), 2.30–2.25 (m, 1H), 2.03–1.99 (m, 1H), 1.93–1.88 (m, 1H), 1.56–1.49 (m, 3H), 1.38 (d,  $J = 7.6$  Hz, 1H), 1.02 (s, 3H), 0.89 ppm (s, 3H);  $^{13}\text{C}$  NMR (150 MHz, 300 K, DMSO- $d_6$ ):  $\delta = 178.7, 173.5, 170.6, 165.7, 156.9, 141.9, 122.2, 120.2$  (q,  $J = 255.2$  Hz), 115.8, 66.1, 60.5, 50.7, 45.6, 39.0 (assigned using HSQC), 37.6, 33.4, 30.4, 27.5, 27.0, 25.9, 18.7, 12.7 ppm;  $^{19}\text{F}$  NMR (565 MHz, 300 K, DMSO-

$d_6$ ):  $\delta = -57.3$  ppm (s, 3F); IR (film):  $\tilde{\nu} = 3276, 3080, 2927, 2856, 1669, 1652, 1559, 1519, 1456, 1436, 1379, 1330, 1314, 1264, 1235, 1197, 1165, 1114, 1085, 1064, 1042, 1011$   $\text{cm}^{-1}$ ; HRMS (ESI):  $m/z$  calculated for  $\text{C}_{24}\text{H}_{30}\text{O}_6\text{N}_4\text{F}_3$   $[\text{M}+\text{H}]^+$ : 527.2112, found: 527.2099.

**(1R,2S,5S)-N-((S)-1-Cyano-2-((S)-2-oxopyrrolidin-3-yl)ethyl)-6,6-dimethyl-3-(2-(4-(trifluoromethoxy)phenoxy)acetyl)-3-azabicyclo[3.1.0]hexane-2-carboxamide (20).** According to General

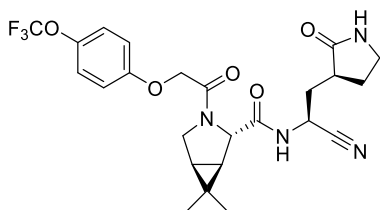

Procedure F, MI-09<sup>13</sup> nitrile **20** (20 mg, 53%) was obtained from amide **51** (38 mg, 0.07 mmol), following HPLC purification (ACE 10 AQ 250  $\times$  21.2 mm column; 20 mL/min; using a linear gradient of 2%<sub>v/v</sub>  $\rightarrow$  65%<sub>v/v</sub> acetonitrile (+0.1%<sub>v/v</sub> formic acid) in water (+0.1%<sub>v/v</sub> formic acid) over 30 min;  $t_R = 26.3$  min). <sup>1</sup>H and <sup>13</sup>C NMR analysis indicated the presence of two rotamers, their relative ratio depends on the solvent used for NMR

analysis; NMR data are given for the major rotamer. The occurrence of rotamers during NMR analysis of nirmatrelvir and derivatives has been reported<sup>8</sup>. White amorphous solid; <sup>1</sup>H NMR (600 MHz, 300 K, DMSO- $d_6$ ):  $\delta = 8.87$  (d,  $J = 8.1$  Hz, 1H), 7.65 (s, 1H), 7.24–7.23 (m, 2H), 6.95–6.92 (m, 2H), 4.94 (ddd,  $J = 9.5, 8.1, 6.6$  Hz, 1H), 4.89 (d,  $J = 15.7$  Hz, 1H), 4.70 (d,  $J = 15.7$  Hz, 1H), 4.11 (s, 1H), 3.85 (dd,  $J = 10.4, 5.5$  Hz, 1H), 3.53 (d,  $J = 10.4$  Hz, 1H), 3.04–3.01 (m, 1H), 2.91–2.87 (m, 1H), 2.34–2.27 (m, 1H), 2.13–2.00 (m, 2H), 1.75 (ddd,  $J = 13.6, 9.5, 6.4$  Hz, 1H), 1.64–1.60 (m, 1H), 1.57 (dd,  $J = 7.4, 5.6$  Hz, 1H), 1.31 (d,  $J = 7.5$  Hz, 1H), 1.03 (s, 3H), 0.89 ppm (s, 3H); <sup>13</sup>C NMR (150 MHz, 300 K, DMSO- $d_6$ ):  $\delta = 177.6, 170.7, 165.7, 156.8, 141.9, 122.2, 119.5, 118.5$  (q,  $J = 254.3$  Hz), 115.8, 65.9, 60.2, 45.5, 39.3 (assigned using HSQC), 38.1, 37.0, 33.6, 30.2, 27.2, 27.0, 25.8, 18.9, 12.6 ppm; <sup>19</sup>F NMR (565 MHz, 300 K, DMSO- $d_6$ ):  $\delta = -57.3$  ppm (s, 3F); IR (film):  $\tilde{\nu} = 3275, 2980, 1671, 1558, 1541, 1507, 1458, 1436, 1376, 1351, 1264, 1232, 1196, 1162, 1110, 1083, 1059, 1012$   $\text{cm}^{-1}$ ; HRMS (ESI):  $m/z$  calculated for  $\text{C}_{24}\text{H}_{28}\text{O}_5\text{N}_4\text{F}_3$   $[\text{M}+\text{H}]^+$ : 509.2006, found: 509.1990.

**(1R,2S,5S)-N-((S)-1-Amino-1-oxo-3-((S)-2-oxopyrrolidin-3-yl)propan-2-yl)-6,6-dimethyl-3-(2-(4-(trifluoromethyl)phenoxy)acetyl)-3-azabicyclo[3.1.0]hexane-2-carboxamide (52).** According to General

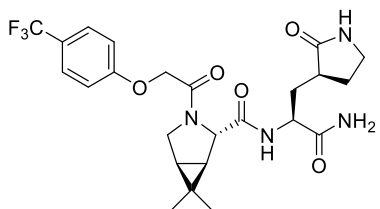

Procedure E, MI-09<sup>13</sup>-derived amide **52** (121 mg, 41%) was obtained from hydrochloride **43**<sup>8</sup> (143 mg, 0.69 mmol) and carboxylic acid **17** (205 mg, 0.57 mmol) (Supporting Figure S4), following HPLC purification (ACE 10 AQ 250  $\times$  21.2 mm column; 20 mL/min; using a linear gradient of 2%<sub>v/v</sub>  $\rightarrow$  98%<sub>v/v</sub> acetonitrile (+0.1%<sub>v/v</sub> formic acid) in water (+0.1%<sub>v/v</sub> formic acid) over 32 min;  $t_R = 18.3$  min). <sup>1</sup>H and <sup>13</sup>C NMR analysis indicated the

presence of two rotamers, their relative ratio depends on the solvent used for NMR analysis; NMR data are given for the major rotamer. The occurrence of rotamers during NMR analysis of nirmatrelvir and derivatives has been reported<sup>8</sup>. White amorphous solid; <sup>1</sup>H NMR (600 MHz, 300 K, DMSO- $d_6$ ):  $\delta = 8.26$  (d,  $J = 8.5$  Hz, 1H), 7.59–7.57 (m, 2H), 7.52 (s, 1H), 7.15 (s, 1H), 7.03–7.02 (m, 3H), 4.94 (d,  $J = 15.8$  Hz, 1H), 4.79 (d,  $J = 15.6$  Hz, 1H), 4.24–4.21 (m, 1H), 4.20 (s, 1H), 3.86 (dd,  $J = 10.3, 5.5$  Hz, 1H), 3.53 (d,  $J = 10.3$  Hz, 1H), 2.95–2.92 (m, 1H), 2.76–2.71 (m, 1H), 2.28–2.22 (m, 1H), 1.99–1.96 (m, 1H), 1.92–1.88 (m, 1H), 1.53–1.51 (m, 3H), 1.39 (d,  $J = 7.5$  Hz, 1H), 1.03 (s, 3H), 0.91 ppm (s, 3H); <sup>13</sup>C NMR (150 MHz, 300 K, DMSO- $d_6$ ):  $\delta = 178.7, 173.5, 170.6, 165.4, 160.9, 126.6$  (q,  $J = 3.6$  Hz), 124.4 (q,  $J = 284.1$  Hz), 121.2 (q,  $J = 32.0$  Hz), 115.1, 65.7, 60.5, 50.6, 45.6, 39.3 (assigned using HSQC), 37.6, 33.4, 30.5, 27.5, 27.0, 25.9, 18.7, 12.8 ppm; <sup>19</sup>F NMR (565 MHz, 300 K, DMSO- $d_6$ ):  $\delta = -59.8$  ppm (s, 3F); IR (film):  $\tilde{\nu} = 3276, 2979, 2883, 1651, 1617, 1594, 1542, 1519, 1456, 1436, 1379, 1329, 1314, 1266, 1235, 1186, 1164, 1114, 1064, 1042, 1011$   $\text{cm}^{-1}$ ; HRMS (ESI):  $m/z$  calculated for  $\text{C}_{24}\text{H}_{30}\text{O}_5\text{N}_4\text{F}_3$   $[\text{M}+\text{H}]^+$ : 511.2163, found: 511.2152.

**(1*R*,2*S*,5*S*)-*N*-((*S*)-1-Cyano-2-((*S*)-2-oxopyrrolidin-3-yl)ethyl)-6,6-dimethyl-3-(2-(4-(trifluoromethyl)phenoxy)acetyl)-3-azabicyclo[3.1.0]hexane-2-carboxamide (21).**

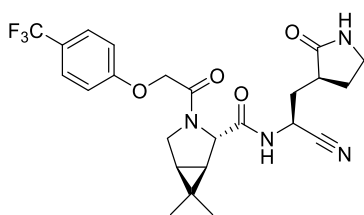

Procedure F, nitrile **21** (61 mg, 58%) was obtained from amide **52** (110 mg, 0.22 mmol), following HPLC purification (ACE 10 AQ 250 × 21.2 mm column; 20 mL/min; using a linear gradient of 2%<sub>v/v</sub> → 98%<sub>v/v</sub> acetonitrile (+0.1%<sub>v/v</sub> formic acid) in water (+0.1%<sub>v/v</sub> formic acid) over 32 min; *t<sub>R</sub>* = 20.3 min). <sup>1</sup>H and <sup>13</sup>C NMR analysis indicated the presence of two rotamers, their relative ratio depends on the solvent used for NMR analysis; NMR data

are given for the major rotamer. The occurrence of rotamers during NMR analysis of nirmatrelvir and derivatives has been reported<sup>8</sup>. White amorphous solid; <sup>1</sup>H NMR (600 MHz, 300 K, DMSO-*d*<sub>6</sub>): δ = 8.87 (d, *J* = 8.2 Hz, 1H), 7.63 (s, 1H), 7.59 (d, *J* = 8.7 Hz, 2H), 7.03 (d, *J* = 8.7 Hz, 2H), 4.97–4.92 (m, 2H), 4.80 (d, *J* = 15.8 Hz, 1H), 4.11 (s, 1H), 3.87 (dd, *J* = 10.4, 5.5 Hz, 1H), 3.54 (d, *J* = 10.2 Hz, 1H), 3.00–2.97 (m, 1H), 2.84–2.80 (m, 1H), 2.32–2.26 (m, 1H), 2.10–2.06 (m, 1H), 2.01–1.97 (m, 1H), 1.74 (ddd, *J* = 13.6, 9.5, 6.3 Hz, 1H), 1.62–1.57 (m, 2H), 1.32 (d, *J* = 7.5 Hz, 1H), 1.03 (s, 3H), 0.90 ppm (s, 3H); <sup>13</sup>C NMR (150 MHz, 300 K, DMSO-*d*<sub>6</sub>): δ = 177.5, 170.7, 165.4, 160.8, 126.6 (q, *J* = 3.3 Hz), 124.5 (q, *J* = 271.0 Hz), 121.3 (q, *J* = 31.9 Hz), 119.5, 115.1, 65.6, 60.2, 45.4, 39.3 (assigned using HSQC), 38.1, 36.9, 33.7, 30.2, 27.2, 27.0, 25.8, 18.9, 12.7 ppm; <sup>19</sup>F NMR (565 MHz, 300 K, DMSO-*d*<sub>6</sub>): δ = –59.8 ppm (s, 3F); IR (film):  $\tilde{\nu}$  = 3276, 2980, 2930, 1674, 1616, 1593, 1520, 1458, 1433, 1379, 1329, 1314, 1237, 1183, 1162, 1113, 1064, 1011 cm<sup>-1</sup>; HRMS (ESI): *m/z* calculated for C<sub>24</sub>H<sub>28</sub>O<sub>4</sub>N<sub>4</sub>F<sub>3</sub> [M+H]<sup>+</sup>: 493.2057, found: 493.2043.

**Benzyl ((*S*)-4-methyl-1-oxo-1-(((*S*)-1-((*S*)-2-oxopyrrolidin-3-yl)but-3-yn-2-yl)amino)pentan-2-yl)carbamate (23).**

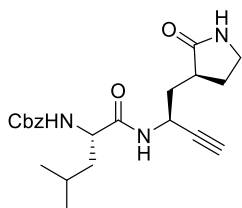

from alkyne **11** (45 mg, 0.24 mmol) and commercially-sourced *N*-(benzyloxycarbonyl)-L-leucine (76 mg, 0.29 mmol) as a 5:1 mixture of diastereomers, following HPLC purification (ACE 10 AQ 250 × 21.2 mm column; 20 mL/min; using a linear gradient of 2%<sub>v/v</sub> → 98%<sub>v/v</sub> acetonitrile (+0.1%<sub>v/v</sub> formic acid) in water (+0.1%<sub>v/v</sub> formic acid) over 32 min; *t<sub>R</sub>* = 19.1 min). White amorphous solid; NMR data are provided for the major diastereomer: <sup>1</sup>H NMR (600 MHz, 300 K, DMSO-*d*<sub>6</sub>): δ = 8.37(d, *J* = 8.6 Hz,

1H), 7.57 (s, 1H), 7.39 (d, *J* = 8.1 Hz, 1H), 7.35–7.29 (m, 5H), 5.03 (d, *J* = 12.8 Hz, 1H), 4.98 (d, *J* = 12.7 Hz, 1H), 4.68–4.64 (m, 1H), 3.97 (ddd, *J* = 9.8, 8.2, 5.1 Hz, 1H), 3.17 (d, *J* = 2.3 Hz, 1H), 3.11–3.08 (m, 1H), 3.03–2.98 (m, 1H), 2.30–2.25 (m, 1H), 2.13–2.09 (m, 1H), 2.05–2.00 (m, 1H), 1.64–1.57 (m, 2H), 1.53–1.49 (m, 1H), 1.46–1.42 (m, 1H), 1.34 (ddd, *J* = 13.6, 8.6, 5.1 Hz, 1H), 0.87 (d, *J* = 6.6 Hz, 3H), 0.84 ppm (d, *J* = 6.4 Hz, 3H); <sup>13</sup>C NMR (150 MHz, 300 K, DMSO-*d*<sub>6</sub>): δ = 178.1, 171.7, 155.9, 137.1, 128.3, 127.6, 127.5, 84.3, 72.8, 65.2, 53.0, 40.5, 39.4 (assigned using HSQC), 38.3, 37.4, 36.7, 27.6, 24.2, 23.0, 21.5 ppm; IR (film):  $\tilde{\nu}$  = 3280, 3056, 2956, 2932, 2871, 1685, 1670, 1540, 1457, 1439, 1387, 1368, 1267, 1242, 1174, 1118, 1047, 1029 cm<sup>-1</sup>; HRMS (ESI): *m/z* calculated for C<sub>22</sub>H<sub>30</sub>O<sub>4</sub>N<sub>4</sub> [M+H]<sup>+</sup>: 400.2231, found: 400.2220.

***tert*-Butyl ((*S*)-1-((*S*)-2-oxopyrrolidin-3-yl)-4-phenylbut-3-yn-2-yl)carbamate (25a).**

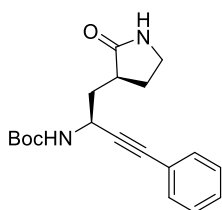

sourced iodobenzene (109 mg, 0.536 mmol), following column chromatography (10 g Sfär cartridge; 40 mL/min; initially, 100%<sub>v/v</sub> cyclohexane (2 CV), followed by a linear gradient (15 CV): 0%<sub>v/v</sub> → 45%<sub>v/v</sub> acetone in cyclohexane). Pale yellow amorphous solid; <sup>1</sup>H NMR (600 MHz, 300 K, DMSO-*d*<sub>6</sub>): δ = 7.61 (s, 1H), 7.43 (brd, *J* = 8.5 Hz, 1H), 7.40–7.38 (m, 2H), 7.37–7.35 (m, 3H), 4.64 (dd, *J* = 15.6, 7.8 Hz, 1H), 3.17–3.11 (m, 2H), 2.30–2.22 (m, 2H), 2.06–2.03 (m, 1H), 1.74–1.68 (m, 1H), 1.61 (ddd, *J* = 13.4, 8.7, 7.1 Hz, 1H), 1.39 ppm (s, 9H); <sup>13</sup>C NMR (150 MHz, 300 K, DMSO-*d*<sub>6</sub>): δ = 178.0, 154.9, 131.3, 128.6, 128.4,



122.4, 90.5, 81.6, 78.2, 41.2, 39.3 (assigned using HSQC), 37.8, 37.1, 28.2, 27.7 ppm; IR (film):  $\tilde{\nu}$  = 3660, 3301, 2981, 2889, 1692, 1514, 1491, 1442, 1391, 1368, 1296, 1251, 1167, 1070, 1026  $\text{cm}^{-1}$ ; HRMS (ESI):  $m/z$  calculated for  $\text{C}_{19}\text{H}_{25}\text{O}_3\text{N}_2$   $[\text{M}+\text{H}]^+$ : 329.1860, found: 329.1852.

**(*S*)-3-((*S*)-2-Amino-4-phenylbut-3-yn-1-yl)pyrrolidin-2-one hydrochloride (26a).** According to General Procedure D, alkyne **26a** (32 mg, app. quant.) was obtained from alkyne **25a** (40 mg, 0.12 mmol) as hydrochloride

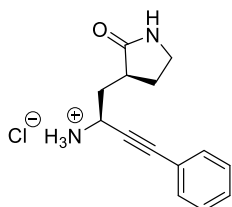

salt, which was used in the next step without further purification. Pale brown solid;  $^1\text{H}$  NMR (600 MHz, 300 K,  $\text{DMSO}-d_6$ ):  $\delta$  = 8.61 (brs, 3H), 7.84 (s, 1H), 7.49–7.46 (m, 2H), 7.45–7.41 (m, 3H), 4.61 (dd,  $J$  = 8.8, 5.9 Hz, 1H), 3.21–3.17 (m, 2H), 2.56–2.51 (m, 1H), 2.36–2.31 (m, 1H), 2.21–2.16 (m, 1H), 1.85–1.80 (m, 1H), 1.79–1.74 ppm (m, 1H);  $^{13}\text{C}$  NMR (150 MHz, 300 K,  $\text{DMSO}-d_6$ ):  $\delta$  = 177.9, 131.5, 129.4, 128.9, 121.0, 86.0, 85.5, 41.7, 39.5 (assigned using HSQC), 38.1, 35.1, 28.0 ppm; IR (film):  $\tilde{\nu}$  = 3659, 3389, 3235, 2981, 2890, 2069, 1679, 1492, 1380, 1252, 1168, 1073, 1049  $\text{cm}^{-1}$ ; HRMS (ESI):  $m/z$  calculated for  $\text{C}_{14}\text{H}_{17}\text{ON}_2$   $[\text{M}-\text{Cl}]^+$ : 229.1335, found: 229.1331.

**(1*R*,2*S*,5*S*)-3-((*S*)-3,3-Dimethyl-2-(2,2,2-trifluoroacetamido)butanoyl)-6,6-dimethyl-*N*-((*S*)-1-((*S*)-2-oxopyrrolidin-3-yl)-4-phenylbut-3-yn-2-yl)-3-azabicyclo[3.1.0]hexane-2-carboxamide (27a).** According to

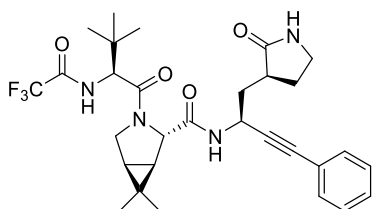

General Procedure E, nirmatrelvir alkyne derivative **27a** (10 mg, 17%) was obtained from alkyne **26a** (25 mg, 0.10 mmol) and carboxylic acid **12<sup>8</sup>** (44 mg, 0.12 mmol), following HPLC purification (ACE 10 AQ 250  $\times$  21.2 mm column; 20 mL/min; using a linear gradient of 2% $_{\text{v/v}}$   $\rightarrow$  75% $_{\text{v/v}}$  acetonitrile (+0.1% $_{\text{v/v}}$  formic acid) in water (+0.1% $_{\text{v/v}}$  formic acid) over 40 min;  $t_{\text{R}}$  = 33.0 min). White amorphous solid;  $^1\text{H}$  NMR (600 MHz, 300 K,  $\text{DMSO}-d_6$ ):  $\delta$  = 9.39 (brs, 1H), 8.65 (d,  $J$  = 9.0 Hz, 1H), 7.55 (s, 1H), 7.42–7.40 (m, 2H), 7.39–7.36 (m, 3H), 4.92 (ddd,  $J$  = 10.8, 9.1, 4.3 Hz, 1H), 4.42 (brs, 1H), 4.19 (s, 1H), 3.91 (dd,  $J$  = 10.2, 5.5 Hz, 1H), 3.68 (d,  $J$  = 10.4 Hz, 1H), 3.14–3.11 (m, 1H), 3.04–3.00 (m, 1H), 2.44–2.41 (m, 1H), 2.20–2.12 (m, 2H), 1.71–1.65 (m, 1H), 1.59 (ddd,  $J$  = 13.5, 11.3, 4.2 Hz, 1H), 1.53 (dd,  $J$  = 7.4, 5.7 Hz, 1H), 1.30 (d,  $J$  = 7.7 Hz, 1H), 1.01 (s, 3H), 0.98 (s, 9H), 0.84 ppm (s, 3H);  $^{13}\text{C}$  NMR (150 MHz, 300 K,  $\text{DMSO}-d_6$ ):  $\delta$  = 178.2, 170.0, 167.3, 156.9 (q,  $J$  = 37.9 Hz), 131.4, 128.7, 128.6, 122.2, 115.8 (q,  $J$  = 287.6 Hz), 90.0, 81.5, 60.2, 58.2, 47.7, 39.4 (assigned using HSQC), 38.5, 37.7, 37.2, 34.6, 30.5, 27.5, 27.2, 26.3, 25.8, 18.7, 12.4 ppm;  $^{19}\text{F}$  NMR (565 MHz, 300 K,  $\text{DMSO}-d_6$ ):  $\delta$  = –72.9 ppm (s, 3F); IR (film):  $\tilde{\nu}$  = 3275, 2980, 2970, 2885, 1685, 1636, 1541, 1508, 1490, 1456, 1441, 1397, 1373, 1298, 1267, 1212, 1178, 1159, 1055, 1028, 1007  $\text{cm}^{-1}$ ; HRMS (ESI):  $m/z$  calculated for  $\text{C}_{30}\text{H}_{38}\text{O}_4\text{N}_4\text{F}_3$   $[\text{M}+\text{H}]^+$ : 575.2840, found: 575.2822.

***tert*-Butyl ((*S*)-4-(4-nitrophenyl)-1-((*S*)-2-oxopyrrolidin-3-yl)but-3-yn-2-yl)carbamate (25b).** According to General Procedure G, alkyne **25b** (100 mg, 44%) was obtained from alkyne **24** (152 mg, 0.60 mmol) and

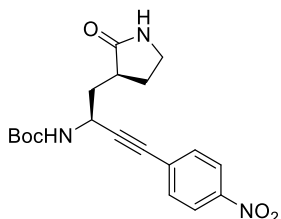

commercially-sourced 1-iodo-4-nitrobenzene (195 mg, 0.78 mmol), following column chromatography (10 g Sfär cartridge; 40 mL/min; initially, 100% $_{\text{v/v}}$  cyclohexane (2 CV), followed by a linear gradient (15 CV): 0% $_{\text{v/v}}$   $\rightarrow$  45% $_{\text{v/v}}$  acetone in cyclohexane). Clear orange oil;  $^1\text{H}$  NMR (600 MHz, 300 K,  $\text{DMSO}-d_6$ ):  $\delta$  = 8.21–8.20 (m, 2H), 7.68–7.65 (m, 2H), 7.62 (brs, 1H), 7.52 (brd,  $J$  = 8.5 Hz, 1H), 4.71 (dd,  $J$  = 15.3, 7.6 Hz, 1H), 3.18–3.11 (m, 2H), 2.34–2.29 (m, 1H), 2.26–2.21 (m, 1H), 2.11–2.04 (m, 1H), 1.75–1.63 (m, 2H), 1.40 ppm (s, 9H);  $^{13}\text{C}$  NMR (150 MHz, 300 K,  $\text{DMSO}-d_6$ ):  $\delta$  = 178.0, 154.9, 146.8, 132.6, 129.2, 123.8, 95.9, 80.3, 78.4, 41.2, 39.3 (assigned using HSQC), 37.7, 36.8, 28.2, 27.6 ppm; IR (film):  $\tilde{\nu}$  = 3659, 3262, 2981, 2918, 2850, 1692, 1594, 1518, 1492, 1473, 1462, 1390, 1367, 1344, 1252, 1165, 1108, 1071, 1013  $\text{cm}^{-1}$ ; HRMS (ESI):  $m/z$  calculated for  $\text{C}_{19}\text{H}_{24}\text{O}_5\text{N}_3$   $[\text{M}+\text{H}]^+$ : 374.1711, found:

**(S)-3-((S)-2-Amino-4-(4-nitrophenyl)but-3-yn-1-yl)pyrrolidin-2-one hydrochloride (26b).** According to General Procedure D, alkyne **26b** (90 mg, app. quant.) was obtained from alkyne **25b** (100 mg, 0.27 mmol) as

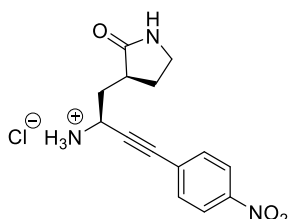

hydrochloride salt, which was used in the next step without further purification. Brown solid;  $^1\text{H NMR}$  (600 MHz, 300 K,  $\text{DMSO-}d_6$ ):  $\delta$  = 8.79 (brs, 3H), 8.27–8.26 (m, 2H), 7.84 (s, 1H), 7.75–7.73 (m, 2H), 4.69 (dd,  $J$  = 8.8, 6.0 Hz, 1H), 3.21–3.15 (m, 2H), 2.59–2.54 (m, 1H), 2.36–2.31 (m, 1H), 2.23–2.18 (m, 1H), 1.87 (ddd,  $J$  = 13.6, 8.8, 6.8 Hz, 1H), 1.80–1.73 ppm (m, 1H);  $^{13}\text{C NMR}$  (150 MHz, 300 K,  $\text{DMSO-}d_6$ ):  $\delta$  = 177.9, 147.4, 132.8, 127.8, 124.0, 90.4, 84.3, 41.5, 39.5 (assigned using HSQC), 38.0, 34.8, 27.9 ppm; IR (film):  $\tilde{\nu}$  = 3395, 2981, 2889, 1706, 1689, 1594, 1519, 1491, 1460, 1381, 1345, 1305, 1282, 1256, 1173, 1119, 1081, 1011  $\text{cm}^{-1}$ ; HRMS (ESI):  $m/z$  calculated for  $\text{C}_{14}\text{H}_{16}\text{O}_3\text{N}_3$   $[\text{M}-\text{Cl}]^+$ : 274.1186, found: 274.1179.

**(1R,2S,5S)-3-((S)-3,3-Dimethyl-2-(2,2,2-trifluoroacetamido)butanoyl)-6,6-dimethyl-*N*-((S)-4-(4-nitrophenyl)-1-((S)-2-oxopyrrolidin-3-yl)but-3-yn-2-yl)-3-azabicyclo[3.1.0]hexane-2-carboxamide (27b).**

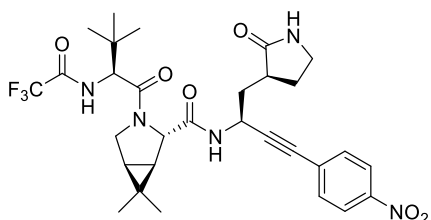

According to General Procedure E, nirmatrelvir alkyne derivative **27b** (20 mg, 11%) was obtained from alkyne **26b** (90 mg, 0.29 mmol) and carboxylic acid **12**<sup>8</sup> (127 mg, 0.35 mmol), following HPLC purification (ACE 10 AQ 250  $\times$  21.2 mm column; 20 mL/min; using a linear gradient of 2%<sub>v/v</sub>  $\rightarrow$  75%<sub>v/v</sub> acetonitrile (+0.1%<sub>v/v</sub> formic acid) in water (+0.1%<sub>v/v</sub> formic acid) over 40 min;  $t_R$  = 31.5 min). Pale brown solid;  $^1\text{H NMR}$  (600 MHz, 300 K,  $\text{DMSO-}d_6$ ):  $\delta$  = 9.40 (d,  $J$  = 8.5 Hz, 1H), 8.73 (d,  $J$  = 8.9 Hz, 1H), 8.23–8.21 (m, 2H), 7.70–7.68 (m, 2H), 7.57 (s, 1H), 4.98 (ddd,  $J$  = 10.8, 9.0, 4.4 Hz, 1H), 4.42 (d,  $J$  = 8.5 Hz, 1H), 4.19 (s, 1H), 3.91 (dd,  $J$  = 10.3, 5.5 Hz, 1H), 3.68 (d,  $J$  = 10.4 Hz, 1H), 3.14–3.11 (m, 1H), 3.05–3.00 (m, 1H), 2.47–2.42 (m, 1H), 2.19–2.15 (m, 2H), 1.72–1.61 (m, 2H), 1.54 (dd,  $J$  = 7.5, 5.6 Hz, 1H), 1.32 (d,  $J$  = 7.7 Hz, 1H), 1.01 (s, 3H), 0.98 (s, 9H), 0.84 ppm (s, 3H);  $^{13}\text{C NMR}$  (150 MHz, 300 K,  $\text{DMSO-}d_6$ ):  $\delta$  = 178.1, 170.1, 167.3, 156.9 (q,  $J$  = 37.1 Hz), 146.8, 132.7, 129.0, 123.8, 115.8 (q,  $J$  = 288.0 Hz), 95.3, 80.1, 60.2, 58.2, 47.7, 39.4 (assigned using HSQC), 38.6, 37.3, 37.1, 34.6, 30.5, 27.4, 27.2, 26.3, 25.8, 18.7, 12.4 ppm;  $^{19}\text{F NMR}$  (565 MHz, 300 K,  $\text{DMSO-}d_6$ ):  $\delta$  = -72.9 ppm (s, 3F); IR (film):  $\tilde{\nu}$  = 3659, 3423, 2981, 2888, 1687, 1642, 1595, 1519, 1440, 1380, 1344, 1212, 1178, 1156, 1051, 1027, 1004  $\text{cm}^{-1}$ ; HRMS (ESI):  $m/z$  calculated for  $\text{C}_{30}\text{H}_{37}\text{O}_6\text{N}_5\text{F}_3$   $[\text{M}+\text{H}]^+$ : 620.2690, found: 620.2672.

**(1R,2S,5S)-3-((S)-3,3-Dimethyl-2-(2,2,2-trifluoroacetamido)butanoyl)-6,6-dimethyl-*N*-((S)-5,5,5-trifluoro-1-((S)-2-oxopyrrolidin-3-yl)pent-3-yn-2-yl)-3-azabicyclo[3.1.0]hexane-2-carboxamide (28).** A mixture of CuI

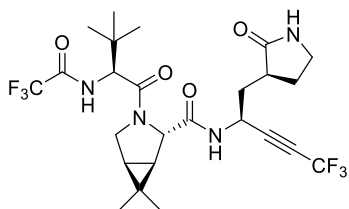

(12 mg, 0.06 mmol, 1.5 equiv.),  $\text{K}_2\text{CO}_3$  (17 mg, 0.12 mmol, 3.0 equiv.), and  $N,N,N',N'$ -tetramethylethylenediamine (TMEDA; 9  $\mu\text{L}$ , 0.06 mmol, 1.5 equiv.) in anhydrous  $N,N$ -dimethylformamide (DMF; 200  $\mu\text{L}$ ) was stirred at room temperature under ambient atmosphere for 15 min during which it turned deep blue. Then,  $\text{TMSCF}_3$  (12  $\mu\text{L}$ , 0.08 mmol, 2.0 equiv.) was added to the mixture and the resulting deep green mixture was stirred for 5 min under air atmosphere, followed by cooling to 0  $^\circ\text{C}$ . An ice-cold solution of nirmatrelvir alkyne derivative **13** (20 mg, 0.04 mmol, 1.0 equiv.) and  $\text{TMSCF}_3$  (12  $\mu\text{L}$ , 0.08 mmol, 2.0 equiv.) in anhydrous DMF (200  $\mu\text{L}$ ) was added to the reaction mixture. The reaction mixture was stirred for 30 min at 0  $^\circ\text{C}$  under ambient atmosphere, and for 24 h at ambient temperature before being diluted with deionized water. The mixture was extracted with diethyl ether (three times); the combined organic layers were sequentially washed with water (three times) and brine, dried over

anhydrous Na<sub>2</sub>SO<sub>4</sub>, filtered, and evaporated. The crude product was purified using HPLC (ACE 10 AQ 250 × 21.2 mm column; 20 mL/min; using a linear gradient of 2%<sub>v/v</sub> → 98%<sub>v/v</sub> acetonitrile (+0.1%<sub>v/v</sub> formic acid) in water (+0.1%<sub>v/v</sub> formic acid) over 32 min; t<sub>R</sub> = 22.5 min). Fractions containing pure **28** were lyophilized to afford the alkyne **28** (6 mg, 26%). <sup>1</sup>H and <sup>13</sup>C NMR analysis indicated the presence of two rotamers, their relative ratio depends on the solvent used for NMR analysis; NMR data are given for the major rotamer. The occurrence of rotamers during NMR analysis of nirmatrelvir and derivatives has been reported<sup>8</sup>. White amorphous solid; <sup>1</sup>H NMR (600 MHz, 300 K, DMSO-*d*<sub>6</sub>): δ = 9.41 (d, *J* = 8.3 Hz, 1H), 7.63 (s, 1H), 4.91 (s, 1H), 4.44 (d, *J* = 8.3 Hz, 1H), 3.90 (dd, *J* = 10.6, 5.2 Hz, 1H), 3.88–3.81 (m, 3H), 3.11–3.08 (m, 2H), 2.78 (dd, *J* = 14.0, 3.5 Hz, 1H), 2.47–2.40 (m, 2H), 2.01–1.96 (m, 1H), 1.72–1.65 (m, 1H), 1.54 (dd, *J* = 7.4, 5.3 Hz, 1H), 1.44 (d, *J* = 7.6 Hz, 1H), 1.01 (s, 3H), 0.94 (s, 9H), 0.87 ppm (s, 3H); <sup>13</sup>C NMR (150 MHz, 300 K, DMSO-*d*<sub>6</sub>): δ = 177.7, 167.8, 162.4, 157.0 (q, *J* = 37.1 Hz), 137.6, 137.3 (q, *J* = 3.3 Hz), 125.0 (q, *J* = 277.7 Hz), 115.9 (q, *J* = 287.7 Hz), 64.9, 58.7, 54.2, 47.4, 40.3, 34.5, 30.8, 29.0 (q, *J* = 31.4 Hz), 27.2, 26.8, 26.1, 25.8, 25.7(7), 19.0, 12.0 ppm; <sup>19</sup>F NMR (565 MHz, 300 K, DMSO-*d*<sub>6</sub>): δ = –63.9 (m, 3F), –72.9 ppm (s, 3F); IR (film): ν̄ = 3652, 3433, 2981, 2888, 1692, 1639, 1551, 1437, 1376, 1357, 1308, 1260, 1213, 1148, 1071 cm<sup>-1</sup>; HRMS (ESI): *m/z* calculated for C<sub>25</sub>H<sub>33</sub>O<sub>4</sub>N<sub>4</sub>F<sub>6</sub> [M+H]<sup>+</sup>: 567.2401, found: 567.2386.

## 6. References

1. Malla, T. R.; Tumber, A.; John, T.; Brewitz, L.; Strain-Damerell, C.; Owen, C. D.; Lukacik, P.; Chan, H. T. H.; Maheswaran, P.; Salah, E.; Duarte, F.; Yang, H.; Rao, Z.; Walsh, M. A.; Schofield, C. J., Mass spectrometry reveals potential of  $\beta$ -lactams as SARS-CoV-2 Mpro inhibitors. *Chem. Commun.* **2021**, 57 (12), 1430-1433.
2. Malla, T. R.; Brewitz, L.; Muntean, D.-G.; Aslam, H.; Owen, C. D.; Salah, E.; Tumber, A.; Lukacik, P.; Strain-Damerell, C.; Mikolajek, H.; Walsh, M. A.; Schofield, C. J., Penicillin derivatives inhibit the SARS-CoV-2 main protease by reaction with its nucleophilic cysteine. *J. Med. Chem.* **2022**, 65 (11), 7682-7696.
3. Brewitz, L.; Kamps, J. J. A. G.; Lukacik, P.; Strain-Damerell, C.; Zhao, Y.; Tumber, A.; Malla, T. R.; Orville, A. M.; Walsh, M. A.; Schofield, C. J., Mass spectrometric assays reveal discrepancies in inhibition profiles for the SARS-CoV-2 papain-like protease. *ChemMedChem* **2022**, 17, e202200016.
4. Engel-Andreasen, J.; Wellhöfer, I.; Wich, K.; Olsen, C. A., Backbone-fluorinated 1,2,3-triazole-containing dipeptide surrogates. *J. Org. Chem.* **2017**, 82 (21), 11613-11619.
5. Nahm, S.; Weinreb, S. M., N-Methoxy-N-methylamides as effective acylating agents. *Tetrahedron Lett.* **1981**, 22 (39), 3815-3818.
6. Ohira, S., Methanolysis of dimethyl (1-diazo-2-oxopropyl) phosphonate: generation of dimethyl (diazomethyl) phosphonate and reaction with carbonyl compounds. *Synth. Commun.* **1989**, 19 (3-4), 561-564.
7. Müller, S.; Liepold, B.; Roth, G. J.; Bestmann, H. J., An improved one-pot procedure for the synthesis of alkynes from aldehydes. *Synlett* **1996**, 1996 (06), 521-522.
8. Owen, D. R.; Allerton, C. M. N.; Anderson, A. S.; Aschenbrenner, L.; Avery, M.; Berritt, S.; Boras, B.; Cardin, R. D.; Carlo, A.; Coffman, K. J.; Dantonio, A.; Di, L.; Eng, H.; Ferre, R.; Gajiwala, K. S.; Gibson, S. A.; Greasley, S. E.; Hurst, B. L.; Kadar, E. P.; Kalgutkar, A. S.; Lee, J. C.; Lee, J.; Liu, W.; Mason, S. W.; Noell, S.; Novak, J. J.; Obach, R. S.; Ogilvie, K.; Patel, N. C.; Pettersson, M.; Rai, D. K.; Reese, M. R.; Sammons, M. F.; Sathish, J. G.; Singh, R. S. P.; Stepan, C. M.; Stewart, A. E.; Tuttle, J. B.; Updyke, L.; Verhoest, P. R.; Wei, L.; Yang, Q.; Zhu, Y., An oral SARS-CoV-2 Mpro inhibitor clinical candidate for the treatment of COVID-19. *Science* **2021**, 374 (6575), 1586-1593.
9. El-Faham, A.; Albericio, F., COMU: a third generation of uronium-type coupling reagents. *J. Pept. Sci.* **2010**, 16 (1), 6-9.
10. Atkins Jr., G. M.; Burgess, E. M., The reactions of an N-sulfonylamine inner salt. *J. Am. Chem. Soc.* **1968**, 90 (17), 4744-4745.
11. Burgess, E. M.; Penton Jr., H. R.; Taylor, E. A., Thermal reactions of alkyl N-carbomethoxysulfamate esters. *J. Org. Chem.* **1973**, 38 (1), 26-31.
12. Zhang, J.-H.; Chung, T. D. Y.; Oldenburg, K. R., A simple statistical parameter for use in evaluation and validation of high throughput screening assays. *J. Biomol. Screen.* **1999**, 4 (2), 67-73.
13. Qiao, J.; Li, Y.-S.; Zeng, R.; Liu, F.-L.; Luo, R.-H.; Huang, C.; Wang, Y.-F.; Zhang, J.; Quan, B.; Shen, C.; Mao, X.; Liu, X.; Sun, W.; Yang, W.; Ni, X.; Wang, K.; Xu, L.; Duan, Z.-L.; Zou, Q.-C.; Zhang, H.-L.; Qu, W.; Long, Y.-H.-P.; Li, M.-H.; Yang, R.-C.; Liu, X.; You, J.; Zhou, Y.; Yao, R.; Li, W.-P.; Liu, J.-M.; Chen, P.; Liu, Y.; Lin, G.-F.; Yang, X.; Zou, J.; Li, L.; Hu, Y.; Lu, G.-W.; Li, W.-M.; Wei, Y.-Q.; Zheng, Y.-T.; Lei, J.; Yang, S., SARS-CoV-2 Mpro inhibitors with antiviral activity in a transgenic mouse model. *Science* **2021**, 371 (6536), 1374-1378.
14. Yang, K. S.; Leeuwon, S. Z.; Xu, S.; Liu, W. R., Evolutionary and structural insights about potential SARS-CoV-2 evasion of nirmatrelvir. *J. Med. Chem.* **2022**, 65 (13), 8686-8698.
15. Douangamath, A.; Fearon, D.; Gehrtz, P.; Krojer, T.; Lukacik, P.; Owen, C. D.; Resnick, E.; Strain-

- Damerell, C.; Aimon, A.; Ábrányi-Balogh, P.; Brandão-Neto, J.; Carbery, A.; Davison, G.; Dias, A.; Downes, T. D.; Dunnett, L.; Fairhead, M.; Firth, J. D.; Jones, S. P.; Keeley, A.; Keserü, G. M.; Klein, H. F.; Martin, M. P.; Noble, M. E. M.; O'Brien, P.; Powell, A.; Reddi, R. N.; Skyner, R.; Snee, M.; Waring, M. J.; Wild, C.; London, N.; von Delft, F.; Walsh, M. A., Crystallographic and electrophilic fragment screening of the SARS-CoV-2 main protease. *Nat. Commun.* **2020**, *11* (1), 5047.
16. Kim, Y.; Lovell, S.; Tiew, K.-C.; Mandadapu, S. R.; Alliston, K. R.; Battaile, K. P.; Groutas, W. C.; Chang, K.-O., Broad-spectrum antivirals against 3C or 3C-like proteases of picornaviruses, noroviruses, and coronaviruses. *J. Virol.* **2012**, *86* (21), 11754-11762.
17. Hu, Y.; Lewandowski, E. M.; Tan, H.; Zhang, X.; Morgan, R. T.; Zhang, X.; Jacobs, L. M. C.; Butler, S. G.; Gongora, M. V.; Choy, J.; Deng, X.; Chen, Y.; Wang, J., Naturally occurring mutations of SARS-CoV-2 main protease confer drug resistance to nirmatrelvir. *bioRxiv* **2022**, 2022.06.28.497978; doi: <https://doi.org/10.1101/2022.06.28.497978>.
18. Moghadasi, S. A.; Heilmann, E.; Khalil, A. M.; Nnabuife, C.; Kearns, F. L.; Ye, C.; Moraes, S. N.; Costacurta, F.; Esler, M. A.; Aihara, H.; von Laer, D.; Martinez-Sobrido, L.; Palzkill, T.; Amaro, R. E.; Harris, R. S., Transmissible SARS-CoV-2 variants with resistance to clinical protease inhibitors. *bioRxiv* **2022**, 2022.08.07.503099; doi: <https://doi.org/10.1101/2022.08.07.503099>.
19. Shin, D.; Mukherjee, R.; Grewe, D.; Bojkova, D.; Baek, K.; Bhattacharya, A.; Schulz, L.; Widera, M.; Mehdipour, A. R.; Tascher, G.; Geurink, P. P.; Wilhelm, A.; van der Heden van Noort, G. J.; Ovaa, H.; Müller, S.; Knobloch, K.-P.; Rajalingam, K.; Schulman, B. A.; Cinatl, J.; Hummer, G.; Ciesek, S.; Dikic, I., Papain-like protease regulates SARS-CoV-2 viral spread and innate immunity. *Nature* **2020**, *587* (7835), 657-662.
20. Klemm, T.; Ebert, G.; Calleja, D. J.; Allison, C. C.; Richardson, L. W.; Bernardini, J. P.; Lu, B. G. C.; Kuchel, N. W.; Grohmann, C.; Shibata, Y.; Gan, Z. Y.; Cooney, J. P.; Doerflinger, M.; Au, A. E.; Blackmore, T. R.; van der Heden van Noort, G. J.; Geurink, P. P.; Ovaa, H.; Newman, J.; Riboldi-Tunncliffe, A.; Czabotar, P. E.; Mitchell, J. P.; Feltham, R.; Lechtenberg, B. C.; Lowes, K. N.; Dewson, G.; Pellegrini, M.; Lessene, G.; Komander, D., Mechanism and inhibition of the papain-like protease, PLpro, of SARS-CoV-2. *EMBO J.* **2020**, *39* (18), e106275.

7. <sup>1</sup>H and <sup>13</sup>C NMR spectra of novel alkyne-containing SARS-CoV-2 M<sup>pro</sup> inhibitors prepared for this study

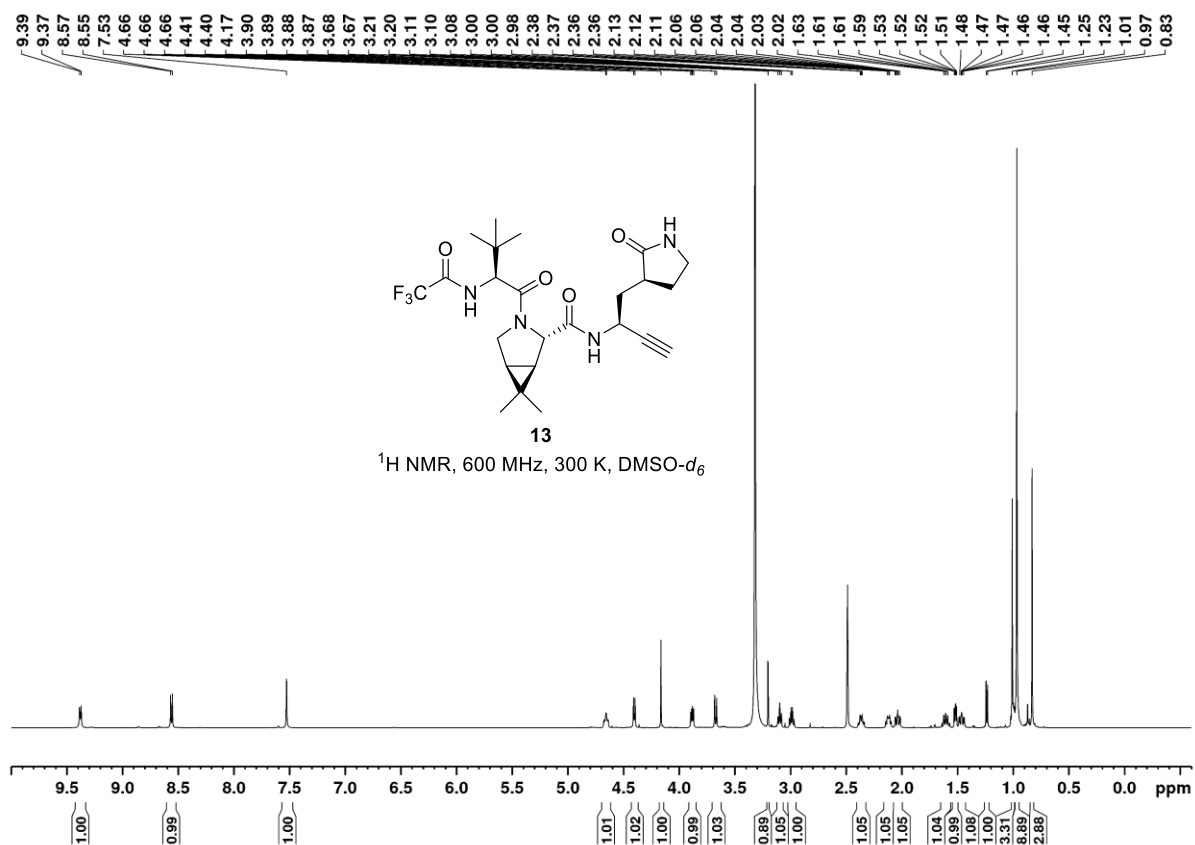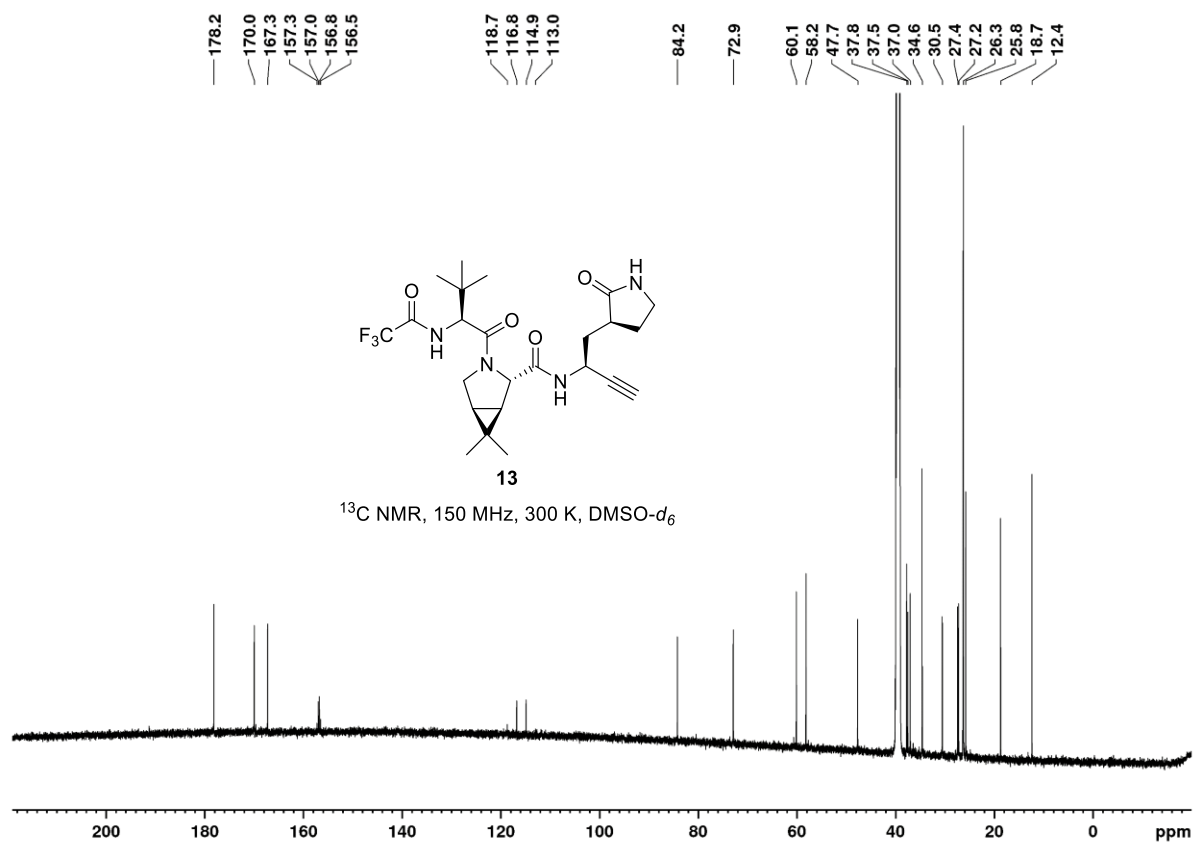

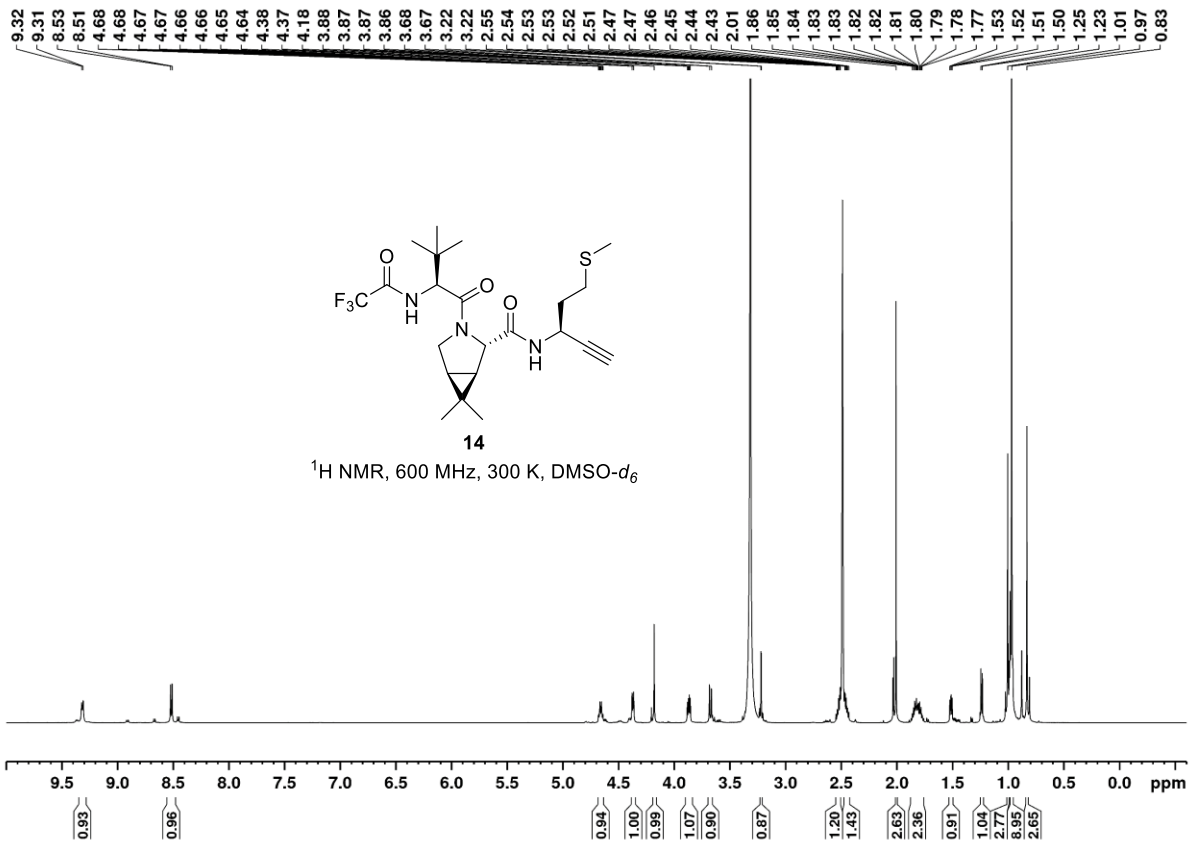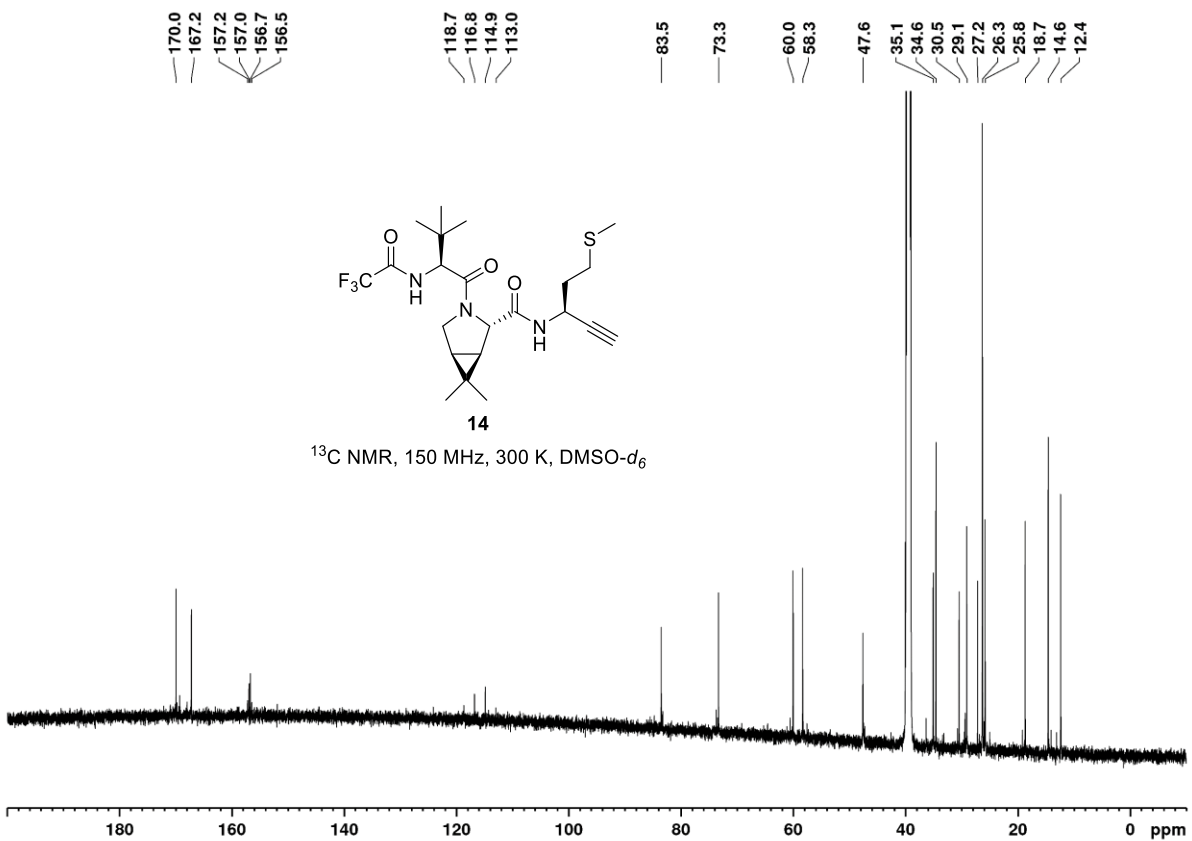

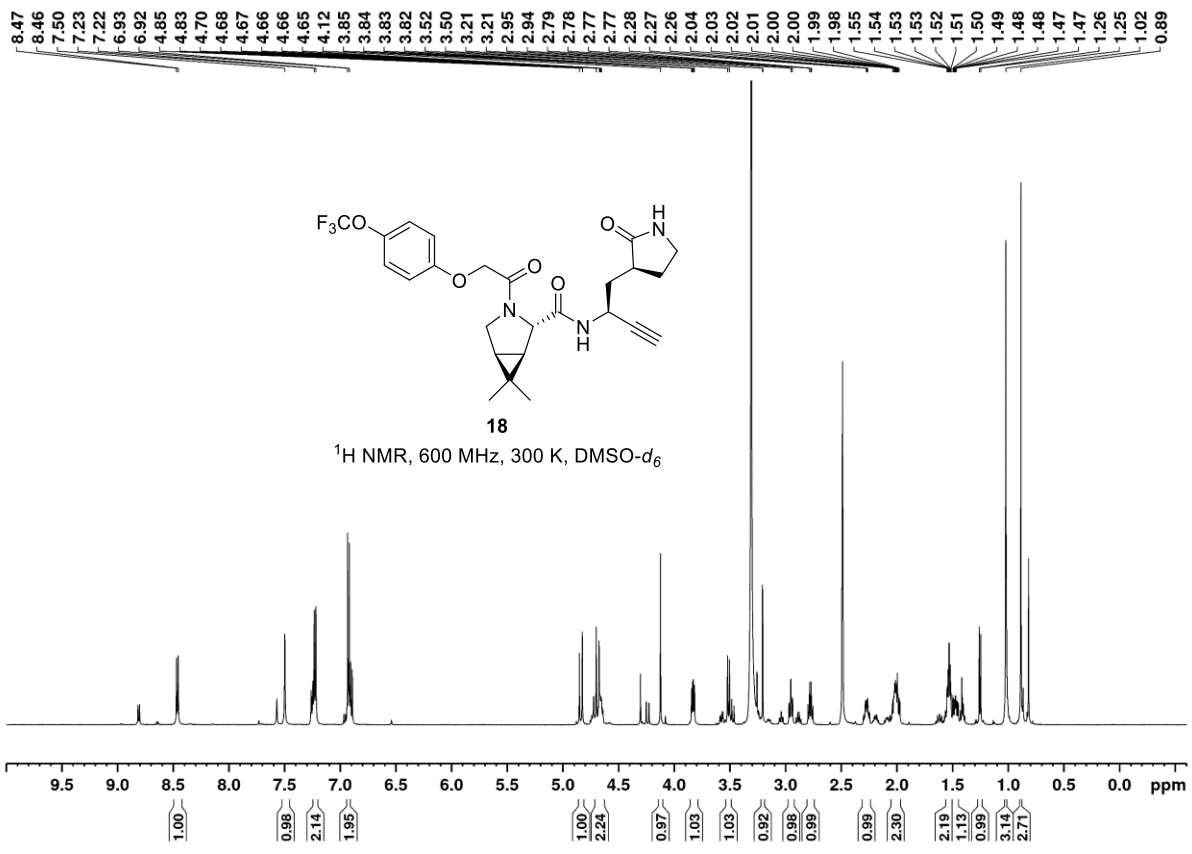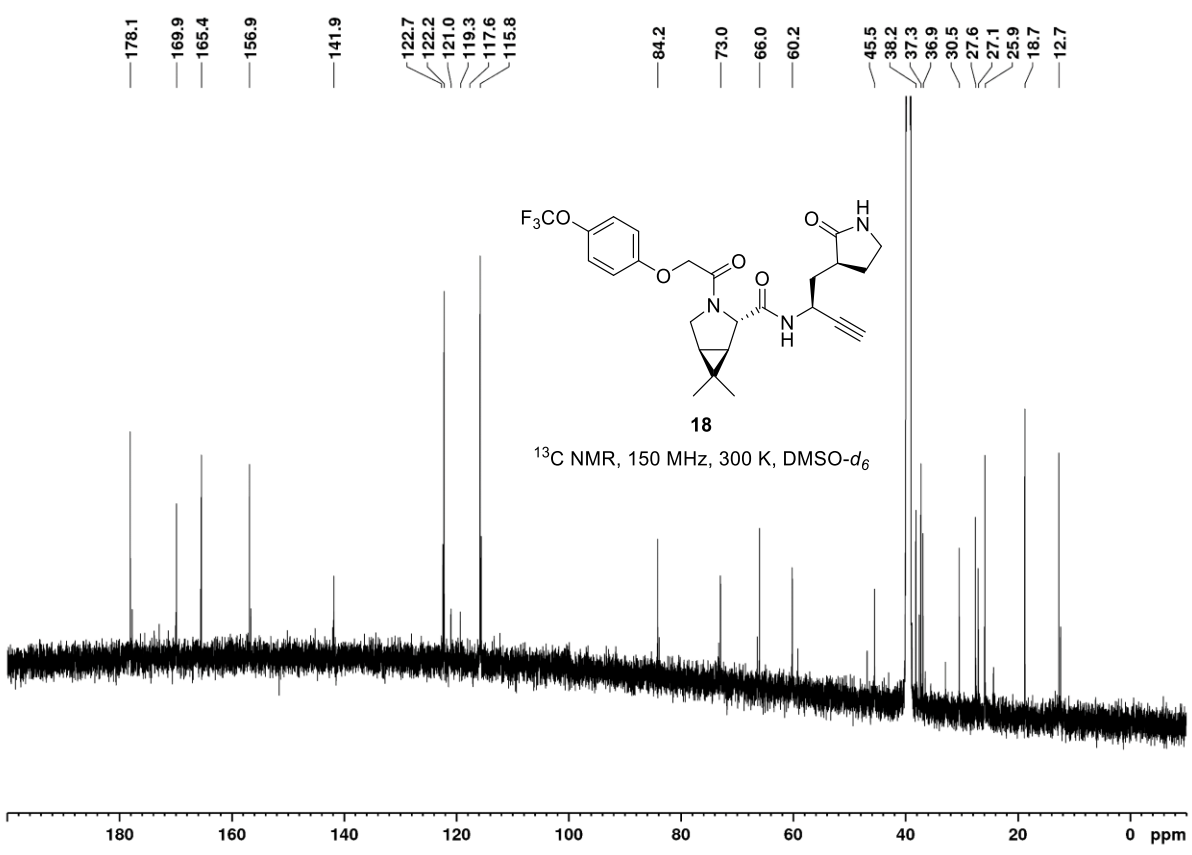



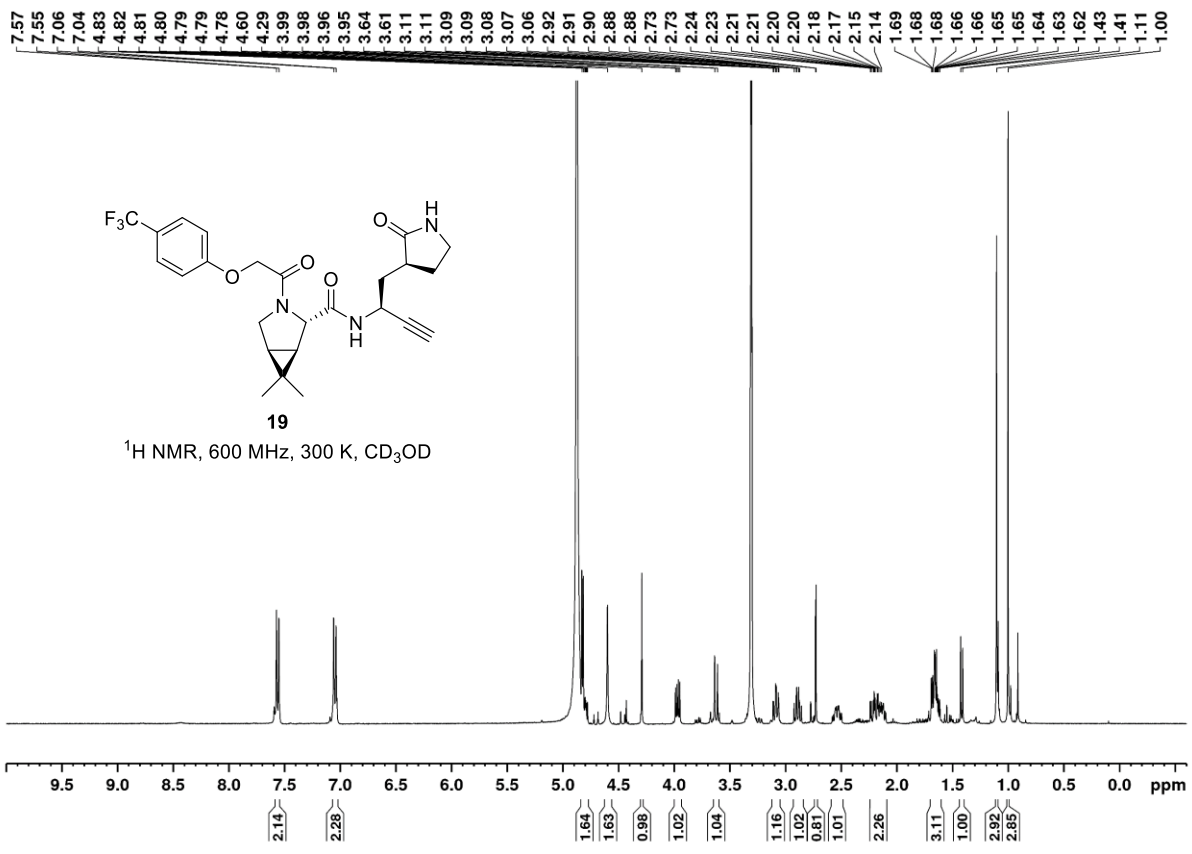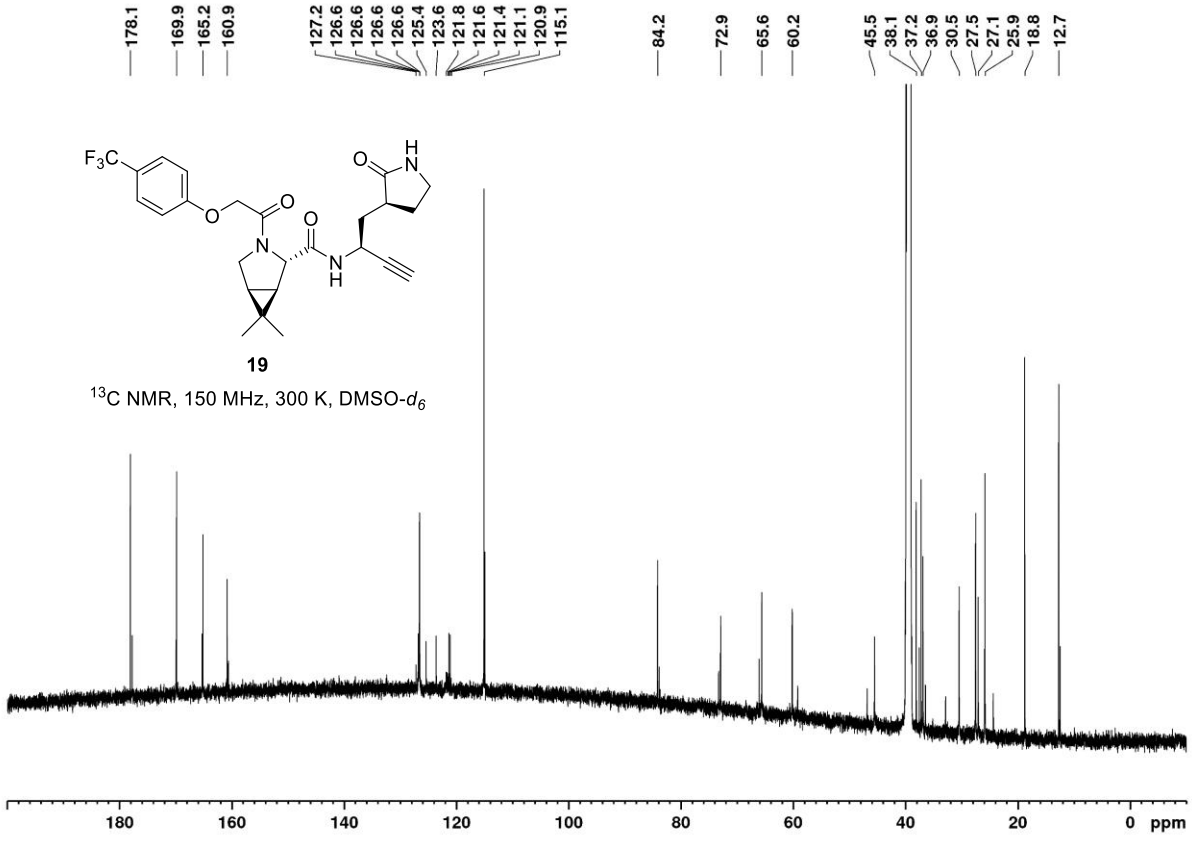

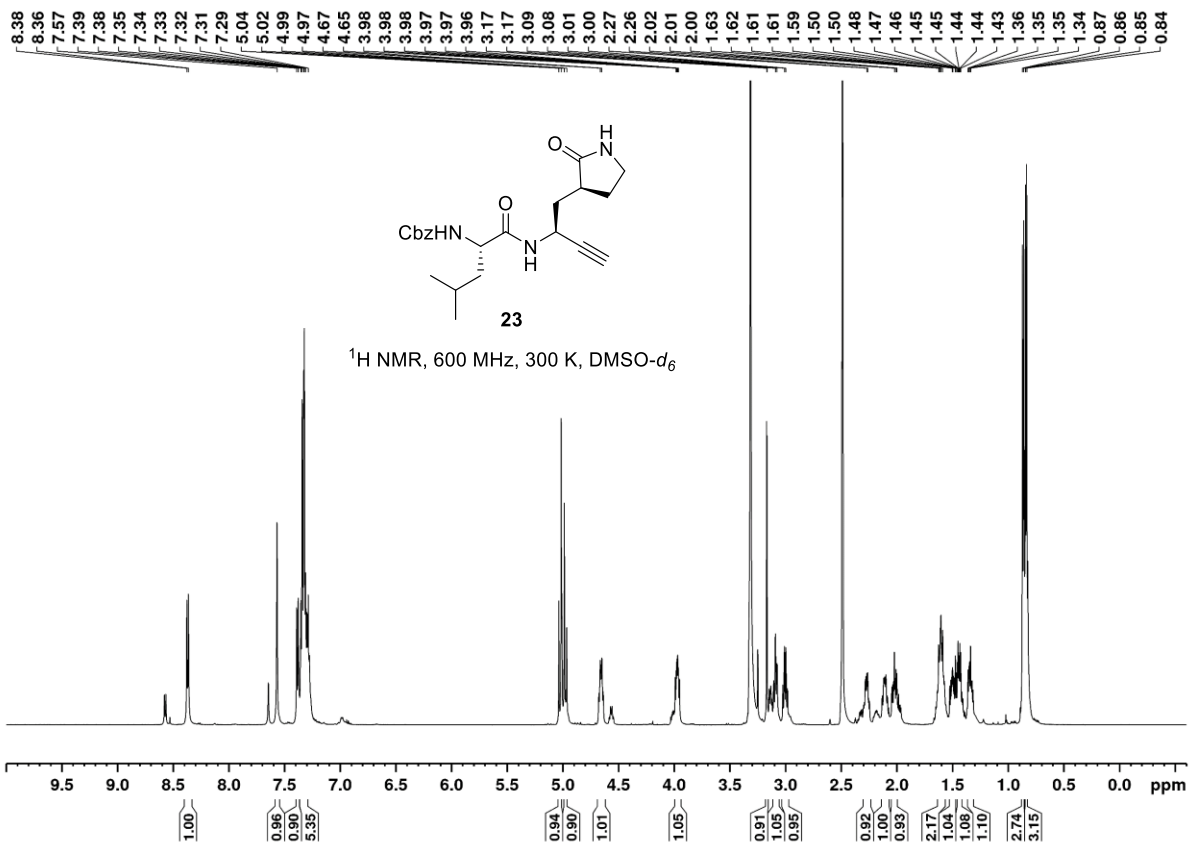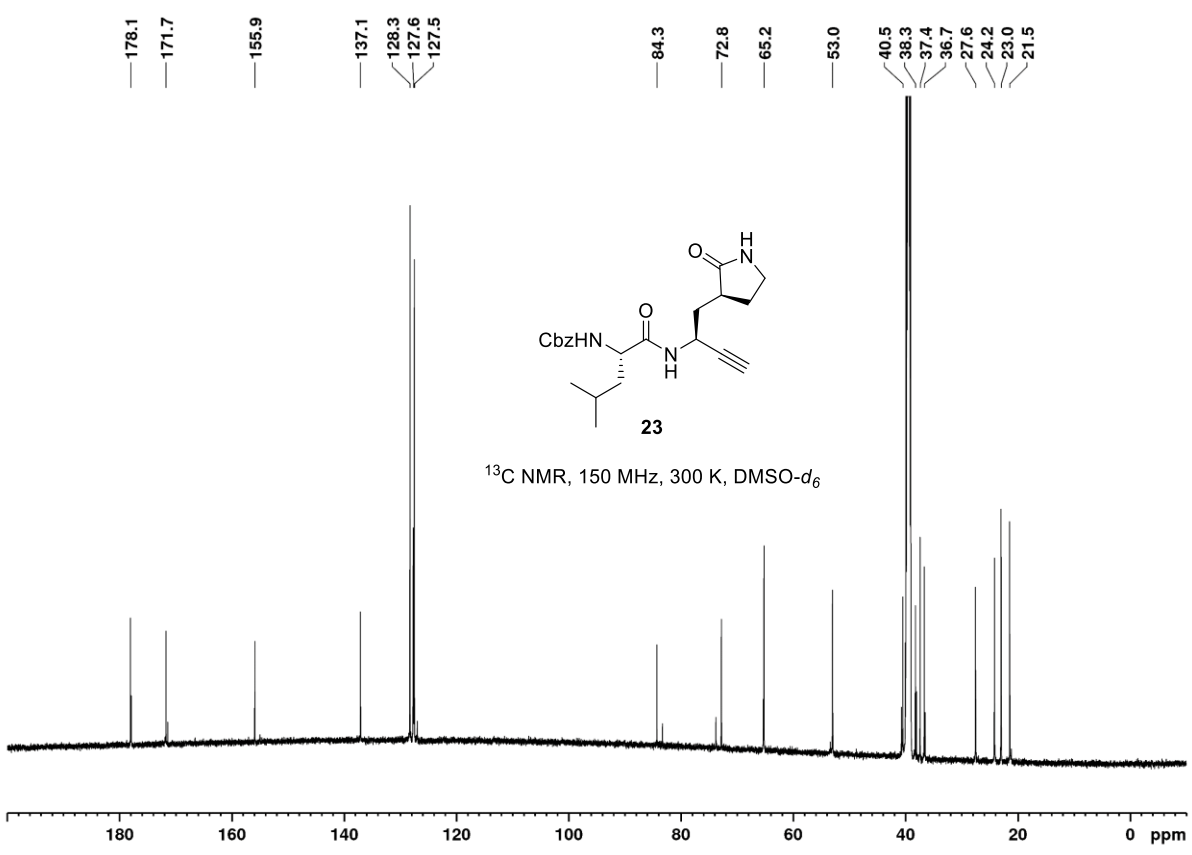

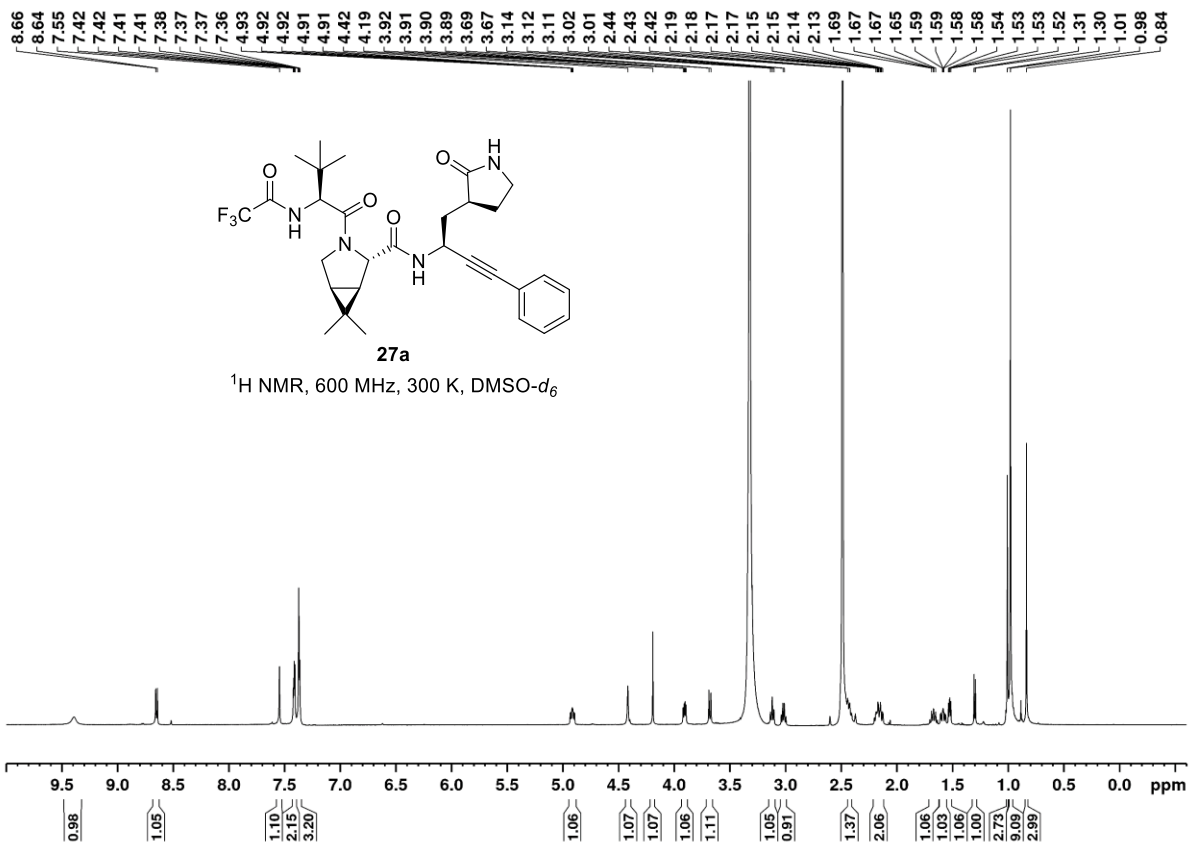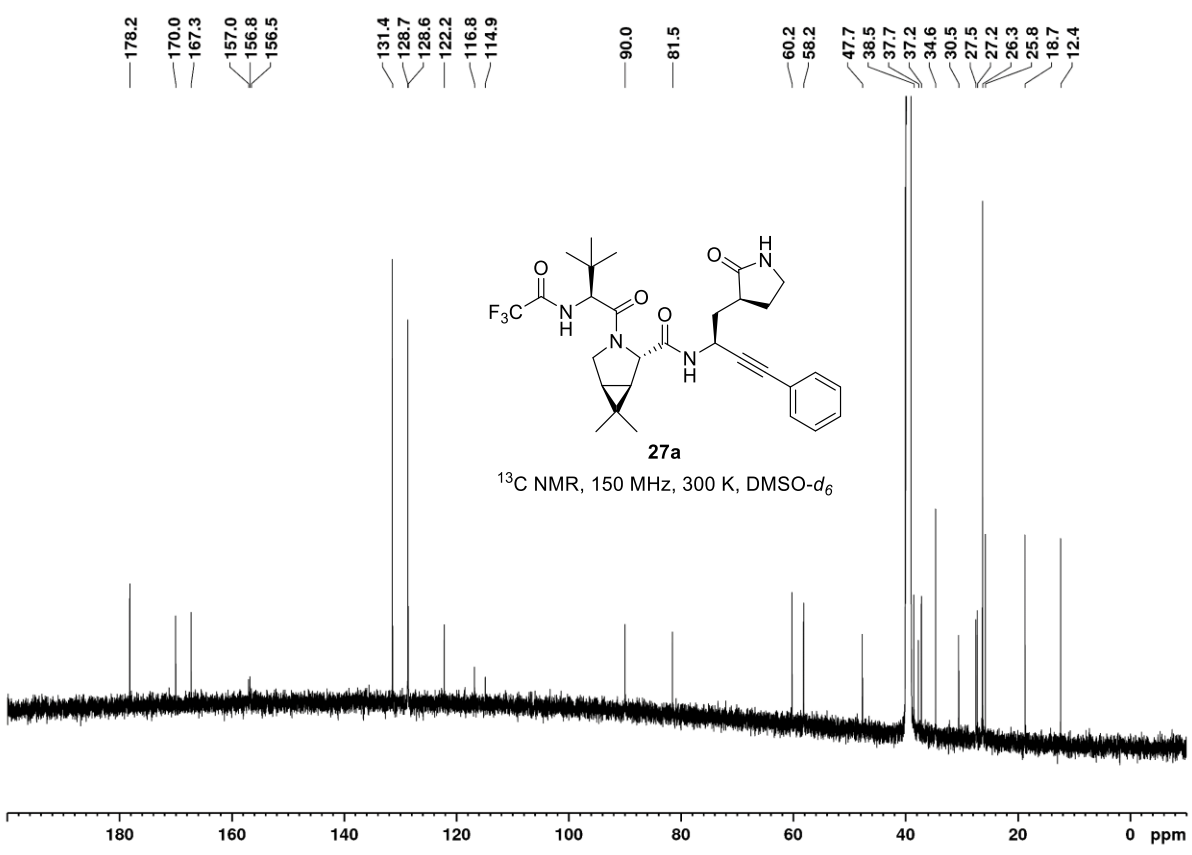

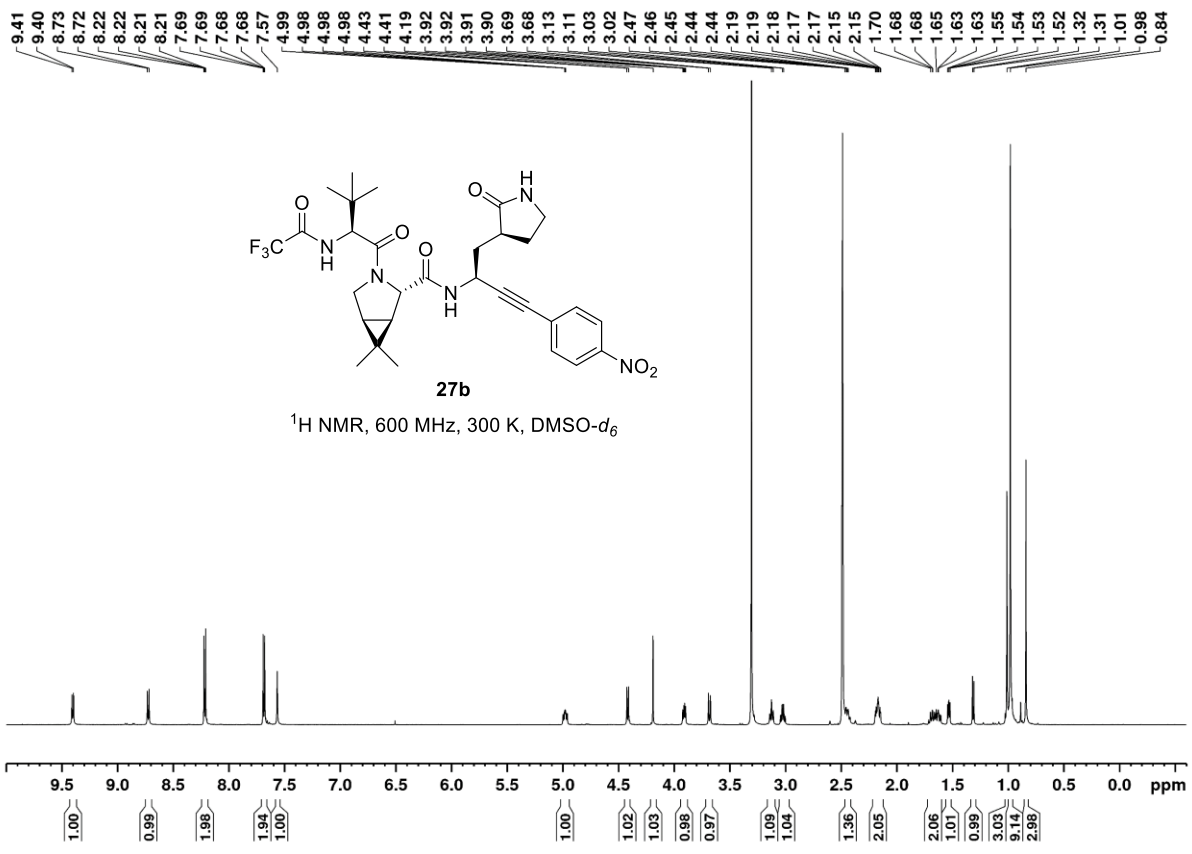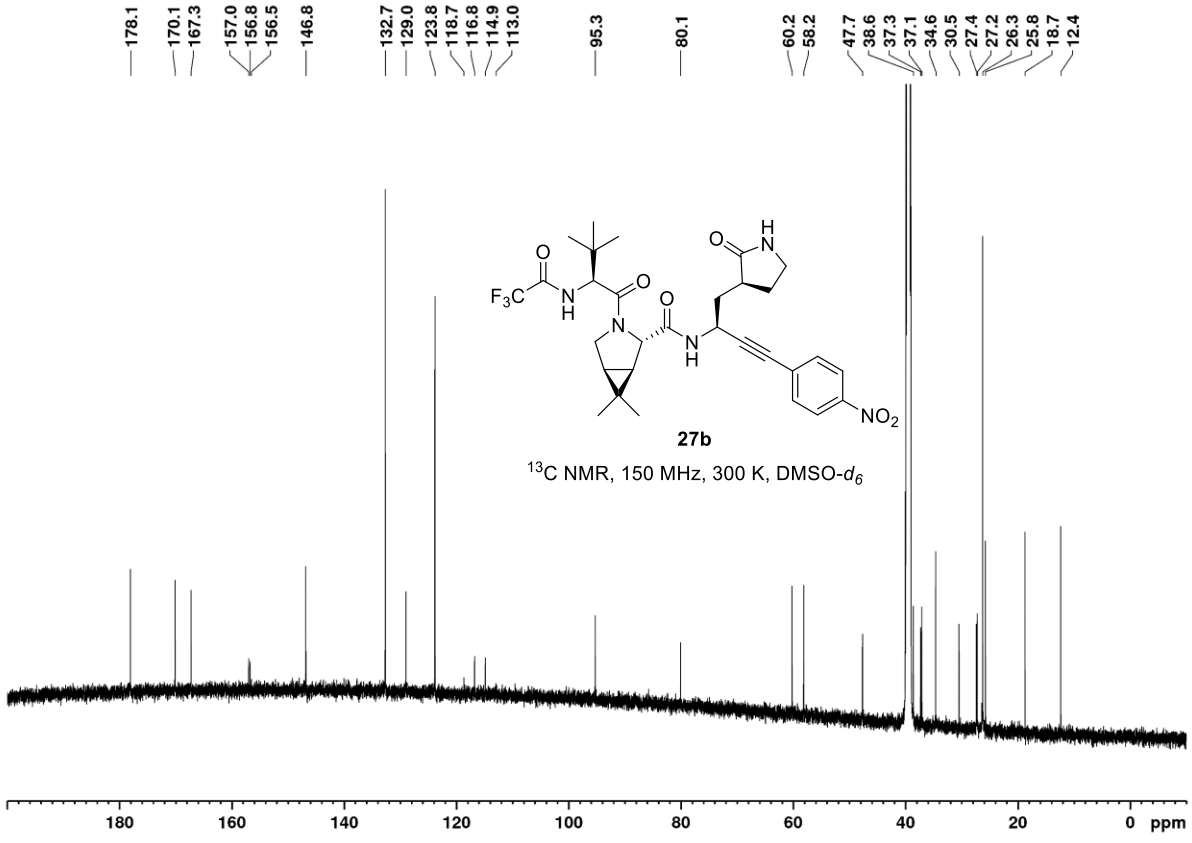

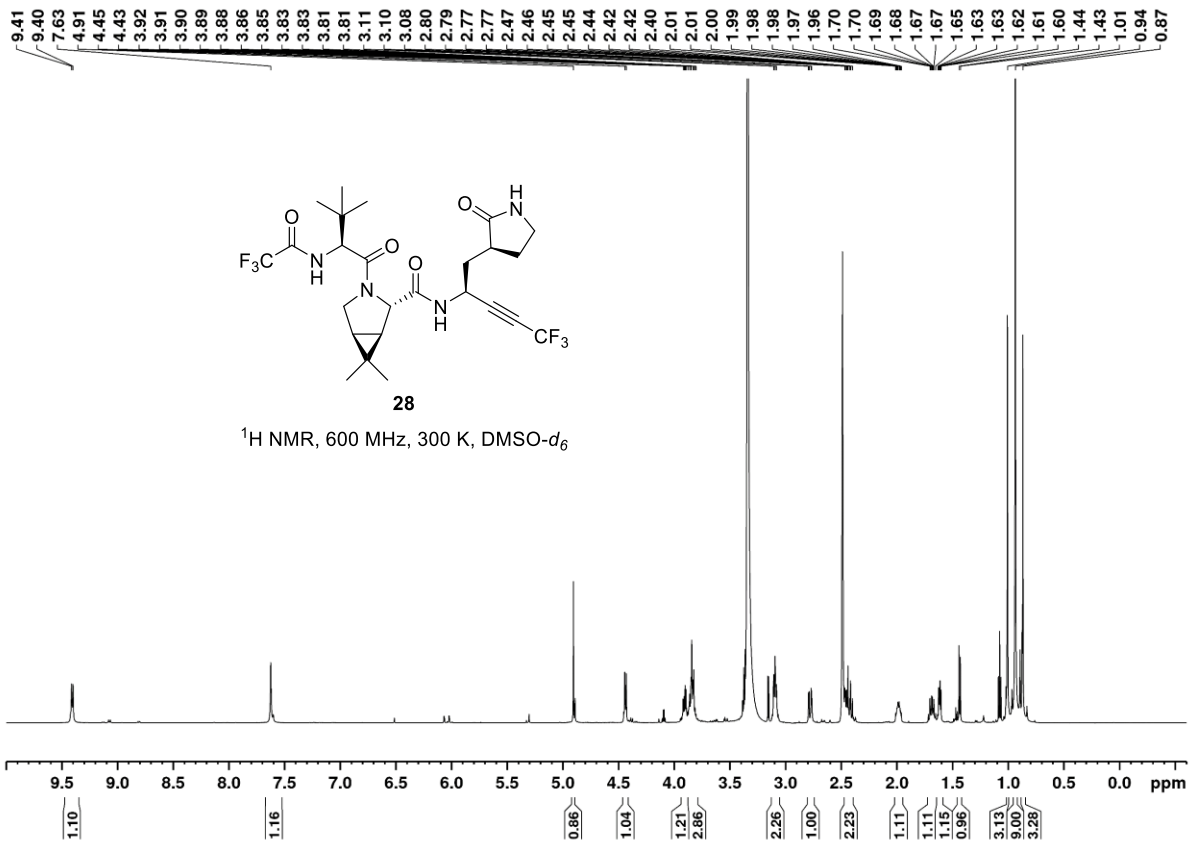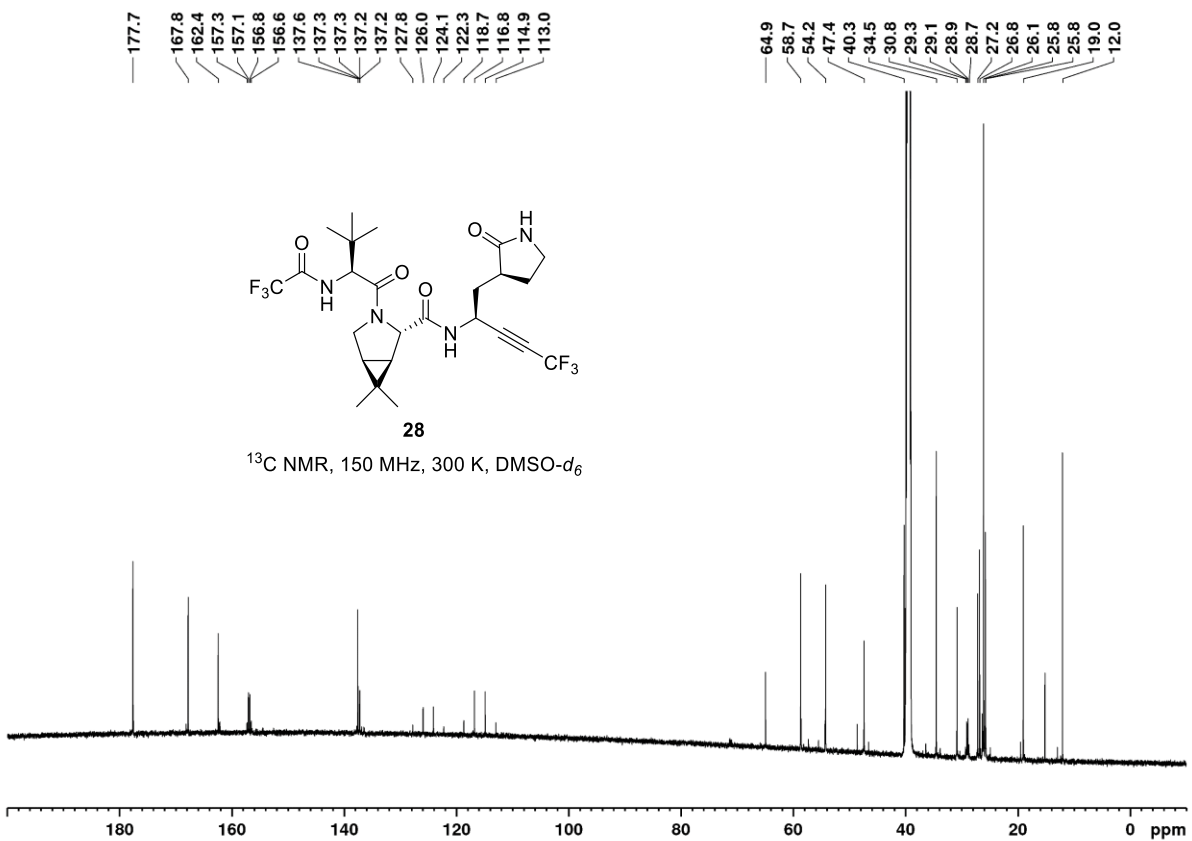

**8. HPLC traces of selected SARS-CoV-2 M<sup>pro</sup> inhibitors prepared for this study.** HPLC traces were recorded using a semi-preparative HPLC machine (Shimadzu UK Ltd.) equipped with a reverse phase column (ACE 5 C18, dimensions: 100 mm length, 21.2 mm inner diameter, 5.0  $\mu$ m particle size). A linear gradient (2–98%<sub>v/v</sub> over 15 min) of acetonitrile in water (each containing 0.1%<sub>v/v</sub> trifluoroacetic acid) was used as eluent (flow rate: 12 mL/min; wavelength monitored: 220 nm). The area% of the major peak (labelled with the retention time,  $t_R$ ) is  $\geq 95\%$  with respect to the sum of the area% of all peaks detected (excluding the injection peaks at ~1 to ~4 min; note that alkynes **13** and **28** were injected as DMSO solutions).

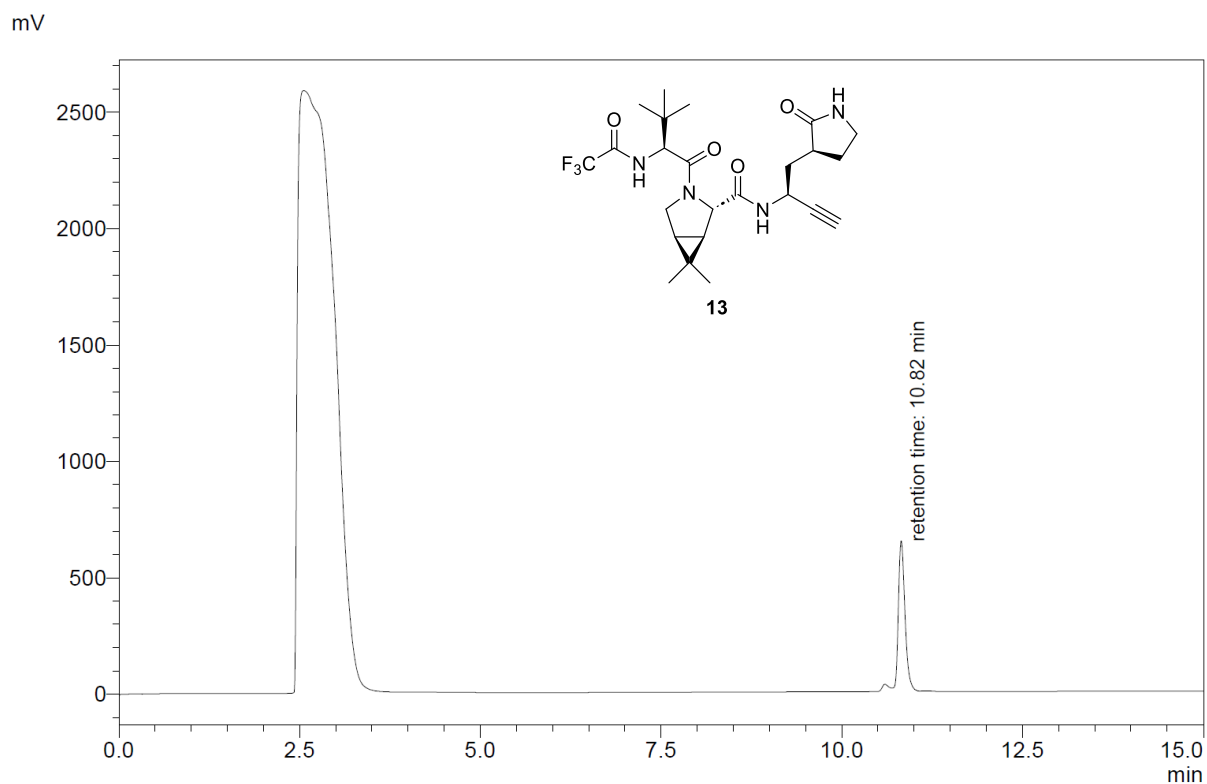

mV

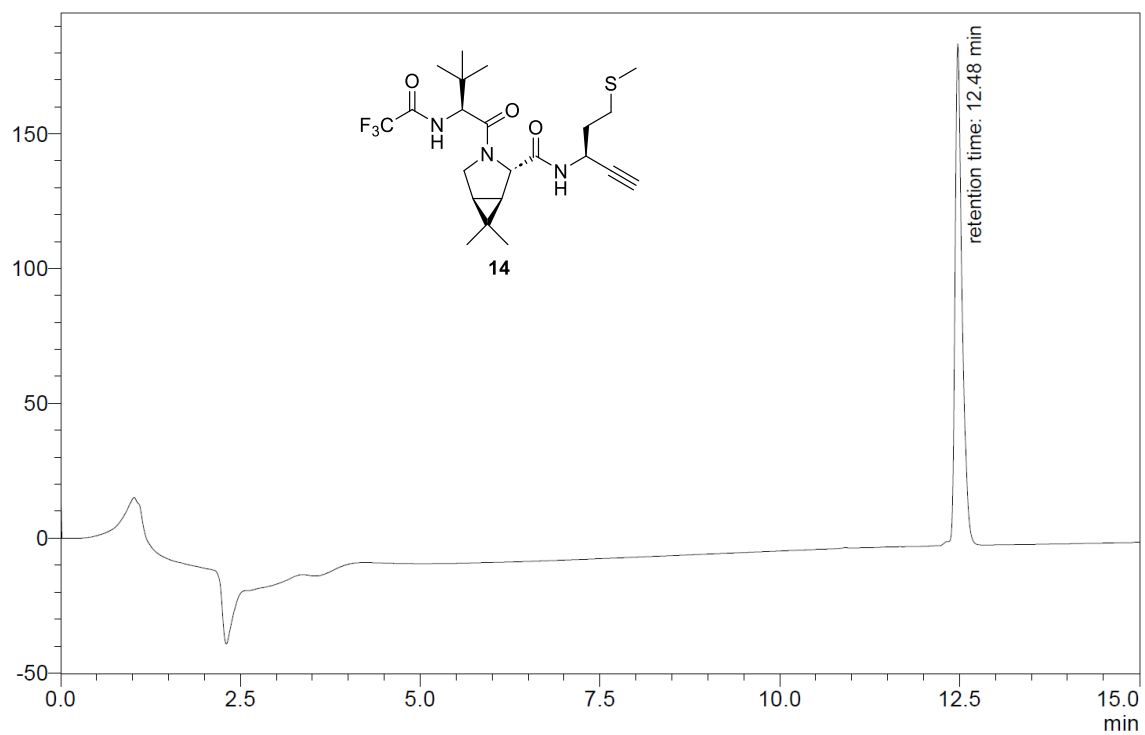

mV

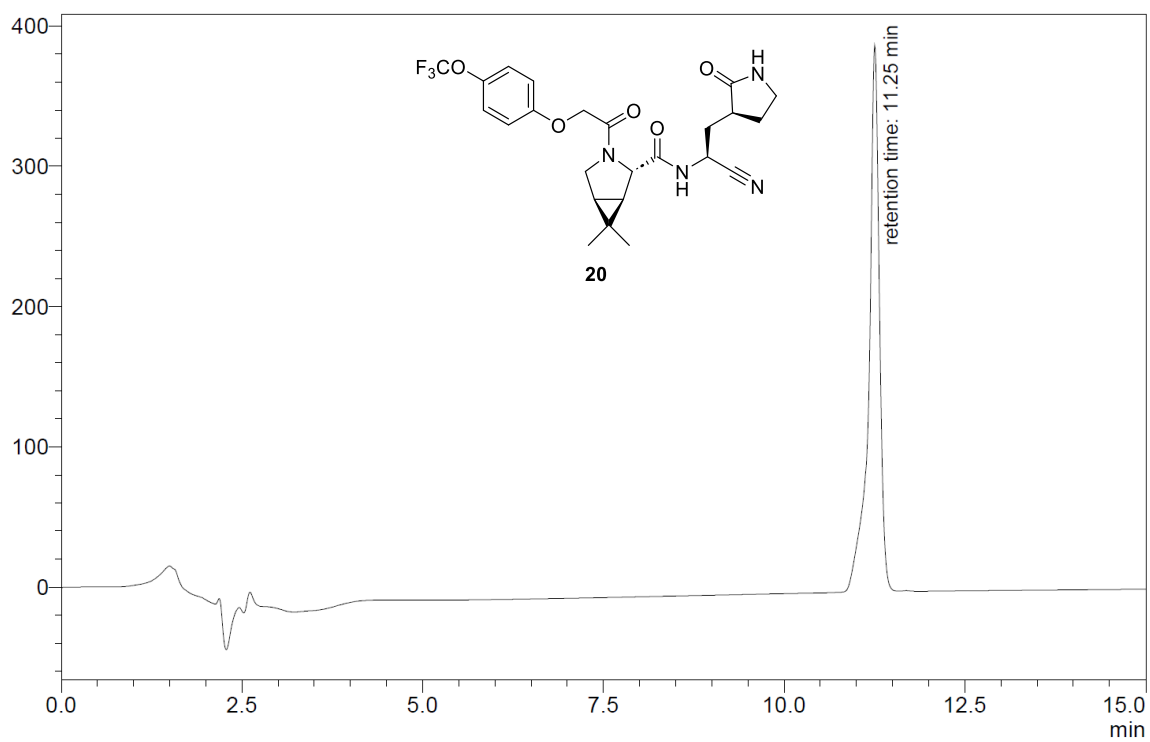

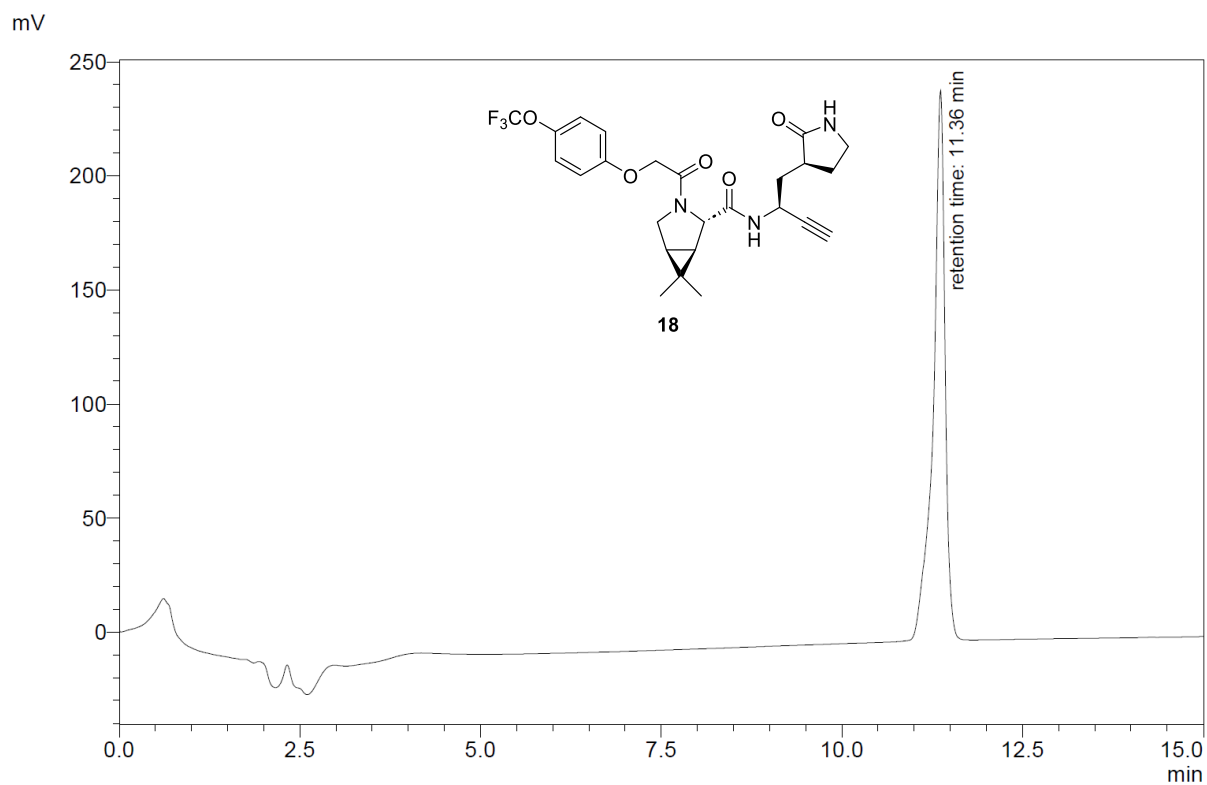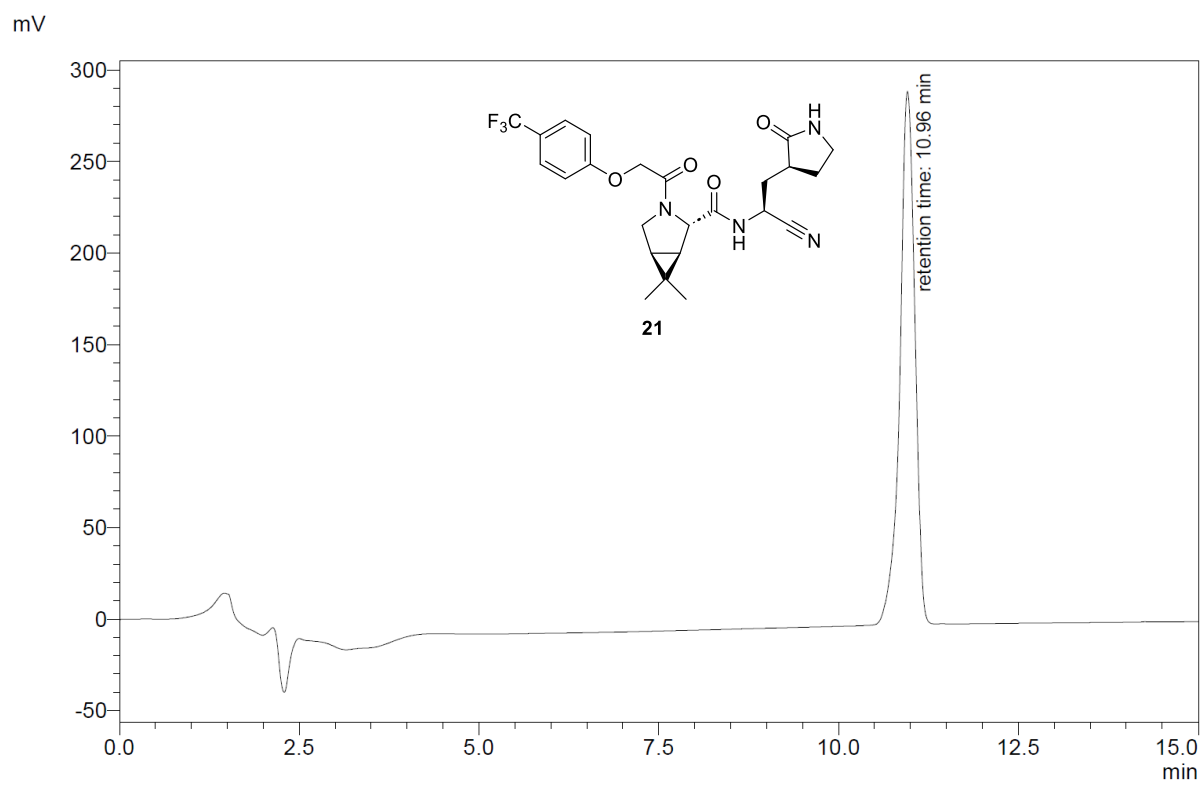



mV

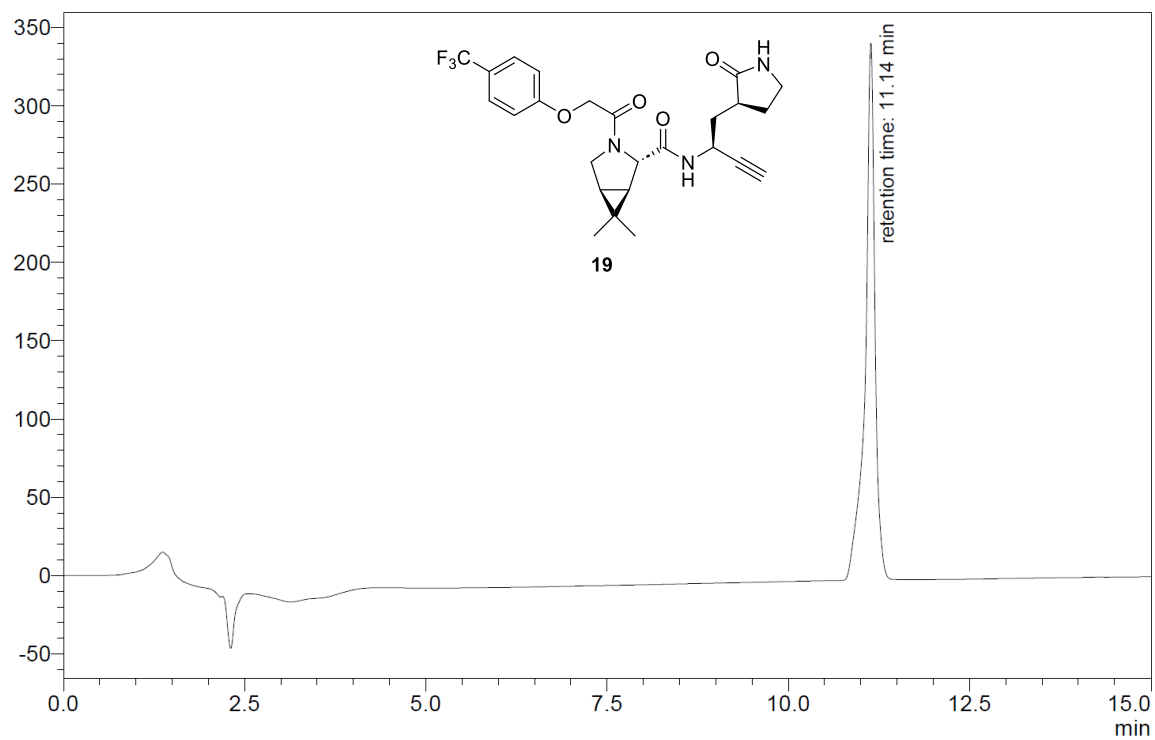

mV

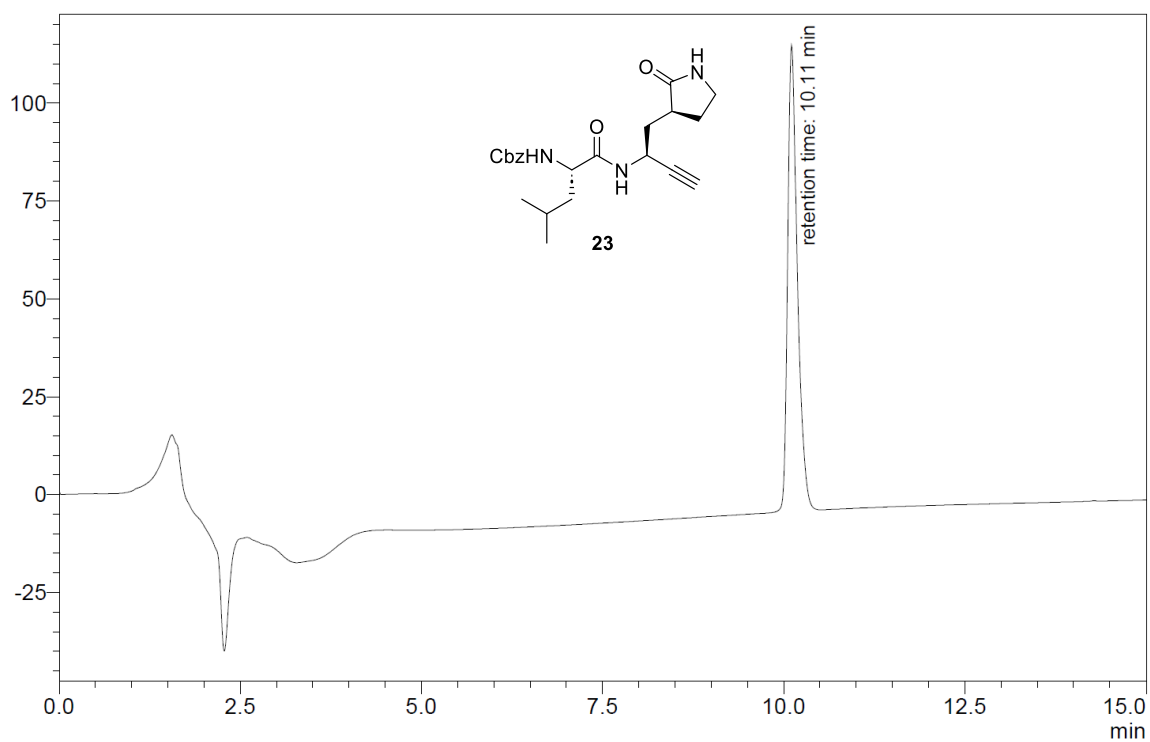

mV

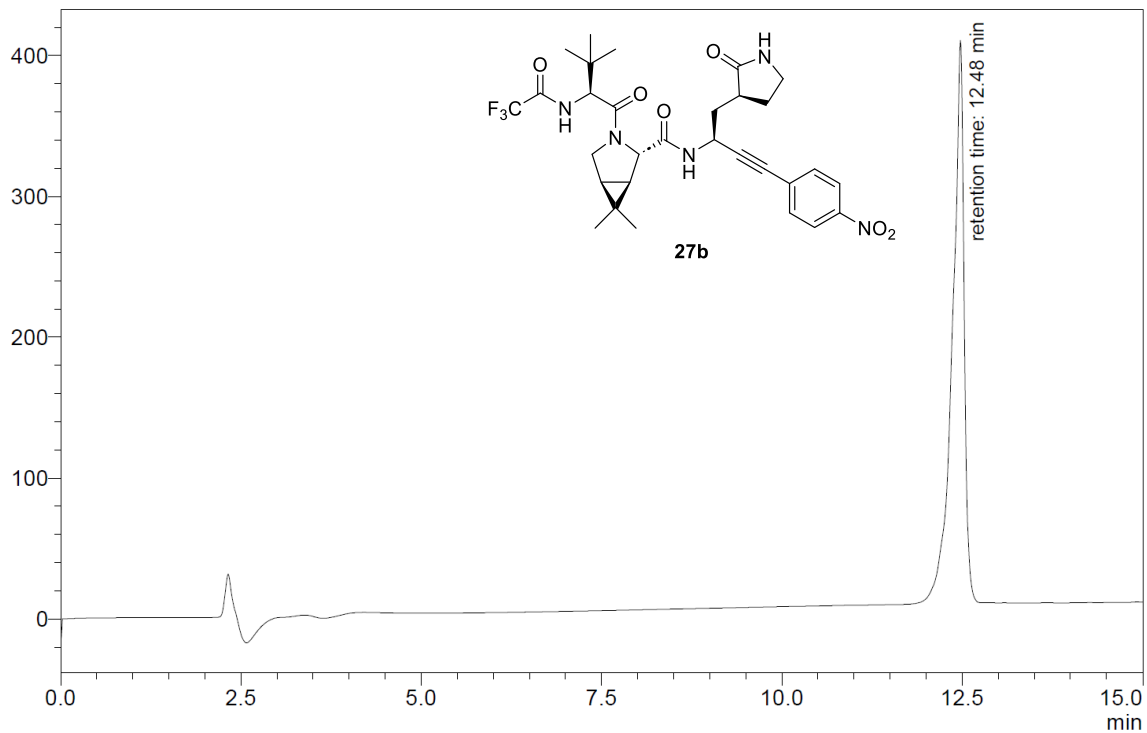

mV

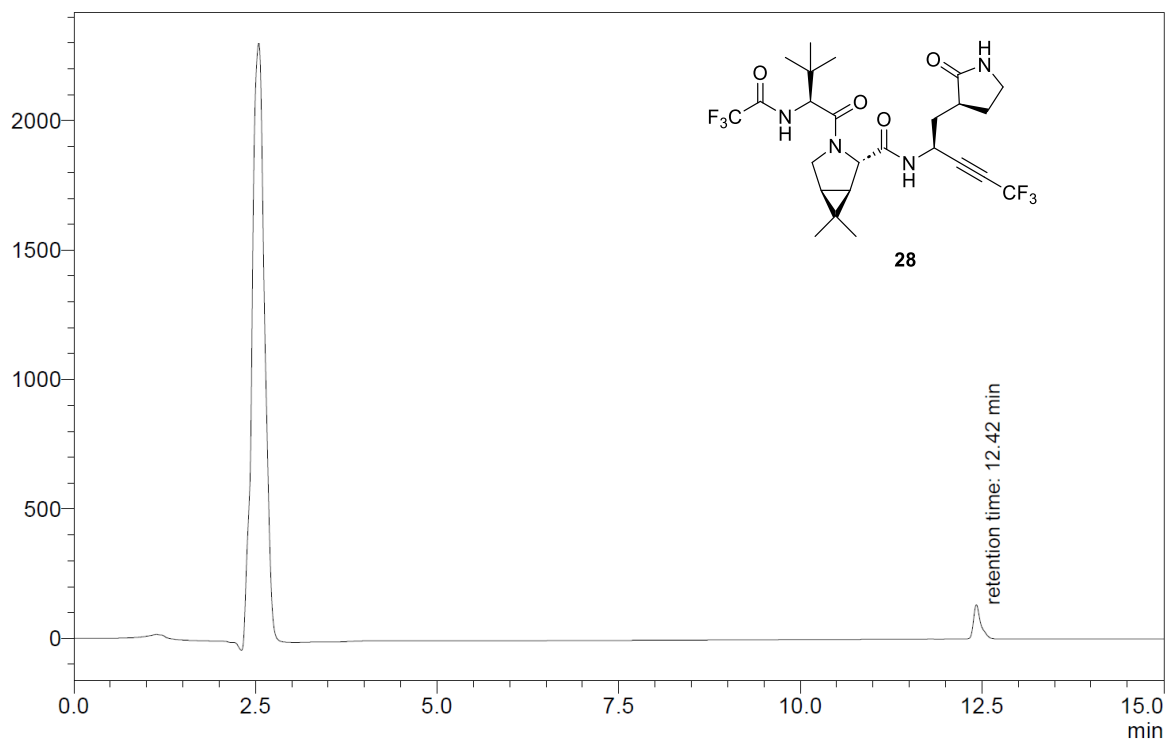

Supplement: jm2c01627_si_001.pdf [file jm2c01627_si_001.pdf]
